# Supplementary material for: A removable directing group-assisted Rh(iii)-catalyzed direct C–H bond activation/annulation cascade to synthesize highly fused isoquinolines
Source: Royal Society of Chemistry journal article supplement (doi:10.1039/d0qo00786b), 2020-01-01
Supplement: d0qo00786b1.pdf [file d0qo00786b1.pdf]

*Electronic supplementary information*

**Removable Directing Group Assisted Rh(III)-catalyzed Direct C-H  
Bond Activation/Annulation Cascade to Highly Fused Isoquinolines**

Yilang Cheng,<sup>a,b,c</sup> Xu Han,<sup>a,b</sup> Junyou Li,<sup>a,b</sup> Yu Zhou<sup>\*a,b</sup> and Hong Liu<sup>\*a,b,c</sup>

<sup>a</sup>State Key Laboratory of Drug Research and CAS Key Laboratory of Receptor Research, Shanghai Institute of Materia Medica, Chinese Academy of Sciences, 555 Zu Chong Zhi Road, Shanghai, 201203, China;

<sup>b</sup>University of Chinese Academy of Sciences, No. 19A Yuquan Road, Beijing 100049, China

<sup>c</sup>School of Life Science and Technology, ShanghaiTech University, 100 Haike Road, Shanghai 201210, China.

\*E-mail: [zhouyu@sim.ac.cn](mailto:zhouyu@sim.ac.cn) (Yu Zhou); E-mail: [hliu@sim.ac.cn](mailto:hliu@sim.ac.cn) (Hong Liu)

## Table of Contents

|                                                                        |           |
|------------------------------------------------------------------------|-----------|
| <b>I. General Information.....</b>                                     | <b>1</b>  |
| <b>II. Optimization of the reaction conditions.....</b>                | <b>2</b>  |
| <b>III. Mechanistic investigations.....</b>                            | <b>3</b>  |
| <b>IV. General Synthetic Procedures and Characterization Data.....</b> | <b>5</b>  |
| <b>V. Charts of compounds.....</b>                                     | <b>23</b> |
| <b>VI. Reference.....</b>                                              | <b>59</b> |

## I. General Information

Commercially available reagents were purchased from commercial sources (J&K, Sigma-Aldrich, Adamas-beta, Energy, Bidepharm, Accela, etc.), and used without further purification. Analytical thin layer chromatography (TLC) was HSGF 254 (0.15–0.2 mm thickness), visualized by irradiation with UV light (254 nm). Column chromatography was performed using silica gel FCP 300-400. Nuclear magnetic resonance spectra were recorded on a Bruker AMX-500MHz instrument (TMS as IS). Chemical shifts were reported in parts per million (ppm,  $\delta$ ) downfield from tetramethylsilane. Proton coupling patterns were described as singlet (s), doublet (d), triplet (t), quartet (q), multiplet (m), and broad (br). Low and high resolution mass were measured by the ESI method with a Tsou-ESI mass spectrometer. All the starting arylacrylamides are known compounds, and were synthesized according to known procedures<sup>1</sup>.

## II. Optimization of the reaction conditions

**Table S1. The additional optimization of the reaction conditions<sup>a</sup>**

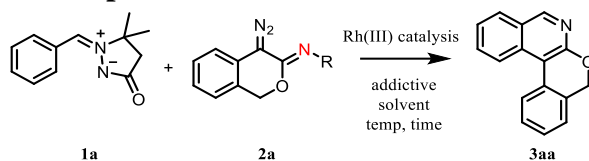

| Entry           | Catalyst (mol %)                                  | Additive (mol %)               | Solvent (mL) | Temp (°C) | Yield of <b>3aa</b> (%) <sup>b</sup> | Time(h) |
|-----------------|---------------------------------------------------|--------------------------------|--------------|-----------|--------------------------------------|---------|
| 1               | [Cp* <i>RhCl</i> <sub>2</sub> ] <sub>2</sub> (10) | NaOAc                          | DCE          | 100       | 36                                   | 12      |
| 2               | [Cp* <i>RhCl</i> <sub>2</sub> ] <sub>2</sub> (10) | AgOAc                          | DCE          | 100       | 28                                   | 12      |
| 3               | [Cp* <i>RhCl</i> <sub>2</sub> ] <sub>2</sub> (10) | CsOAc                          | DCE          | 100       | 29                                   | 12      |
| 4               | [Cp* <i>RhCl</i> <sub>2</sub> ] <sub>2</sub> (10) | Cu(OAc) <sub>2</sub>           | DCE          | 100       | Trace                                | 12      |
| 5               | [Cp* <i>RhCl</i> <sub>2</sub> ] <sub>2</sub> (10) | KOAc                           | DCE          | 100       | 30                                   | 12      |
| 6               | [Cp* <i>RhCl</i> <sub>2</sub> ] <sub>2</sub> (10) | K <sub>2</sub> CO <sub>3</sub> | DCE          | 100       | 33                                   | 12      |
| 7               | [Cp* <i>RhCl</i> <sub>2</sub> ] <sub>2</sub> (10) | AgOTf                          | DCE          | 100       | Trace                                | 12      |
| 8               | [Cp* <i>RhCl</i> <sub>2</sub> ] <sub>2</sub> (10) | AgNO <sub>3</sub>              | DCE          | 100       | Trace                                | 12      |
| 9               | [Cp* <i>RhCl</i> <sub>2</sub> ] <sub>2</sub> (10) | Zn(OAc) <sub>2</sub>           | DCE          | 100       | Nd                                   | 12      |
| 10              | [Cp* <i>RhCl</i> <sub>2</sub> ] <sub>2</sub> (10) | Cu(OTf) <sub>2</sub>           | DCE          | 100       | 28                                   | 12      |
| 11              | [Cp* <i>RhCl</i> <sub>2</sub> ] <sub>2</sub> (10) | PivOH                          | DCE          | 100       | Trace                                | 12      |
| 12              | [Cp* <i>RhCl</i> <sub>2</sub> ] <sub>2</sub> (10) | -                              | DCE          | 100       | Trace                                | 12      |
| 13 <sup>c</sup> | [Cp* <i>RhCl</i> <sub>2</sub> ] <sub>2</sub> (10) | Cu(OAc) <sub>2</sub>           | HFIP         | 40        | 59                                   | 4       |
| 14 <sup>c</sup> | [Cp* <i>RhCl</i> <sub>2</sub> ] <sub>2</sub> (10) | HOAc                           | HFIP         | 40        | 45                                   | 4       |
| 15              | [Cp* <i>RhCl</i> <sub>2</sub> ] <sub>2</sub> (10) | NaOAc                          | MeOH         | 40        | trace                                | 12      |
| 16              | [Cp* <i>RhCl</i> <sub>2</sub> ] <sub>2</sub> (10) | NaOAc                          | EtOH         | 40        | trace                                | 12      |

<sup>a</sup>Reaction conditions: **1a** (0.2 mmol), **2a** (0.24 mmol), [Cp\**RhCl*<sub>2</sub>]<sub>2</sub> (10 mol %), AgSbF<sub>6</sub> (20 mol %), additive (2.0 equiv) in solvent (2.0 mL) under air for 12 h. <sup>b</sup>Determined by <sup>1</sup>H-NMR spectroscopy using dibromomethane as an internal standard. <sup>c</sup>no AgSbF<sub>6</sub>.

### III. Mechanistic investigations

#### 1) H/D Exchange Experiment.

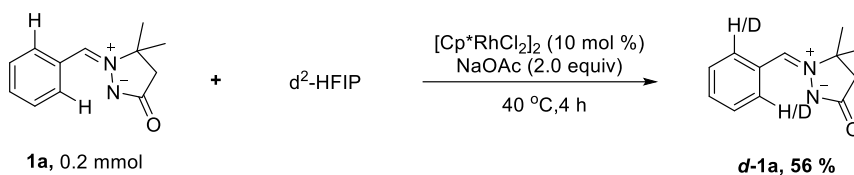

A mixture of **1a** (40.5 mg, 0.2 mmol, 1.0 equiv),  $[Cp^*RhCl_2]_2$  (12.4 mg, 0.02 mmol, 10 mol %), NaOAc (32.5 mg, 0.4 mmol, 2 equiv), and  $d^2$ -HFIP was added into a pressure tube. The resulting mixture was stirred at 40 °C for 4 h. Afterward, the mixture was diluted with  $CH_2Cl_2$  and filtered through a pad of Celite, which was washed with  $CH_2Cl_2$  for three times. The combined organic layer was collected and concentrated in vacuo to yield the crude product which was further purified by flash chromatography eluting with DCM/MeOH = 50:1 to afford the deuterium product as a colorless oil. H/D exchange occurred at the C2-position of azomethine imine (56% D).

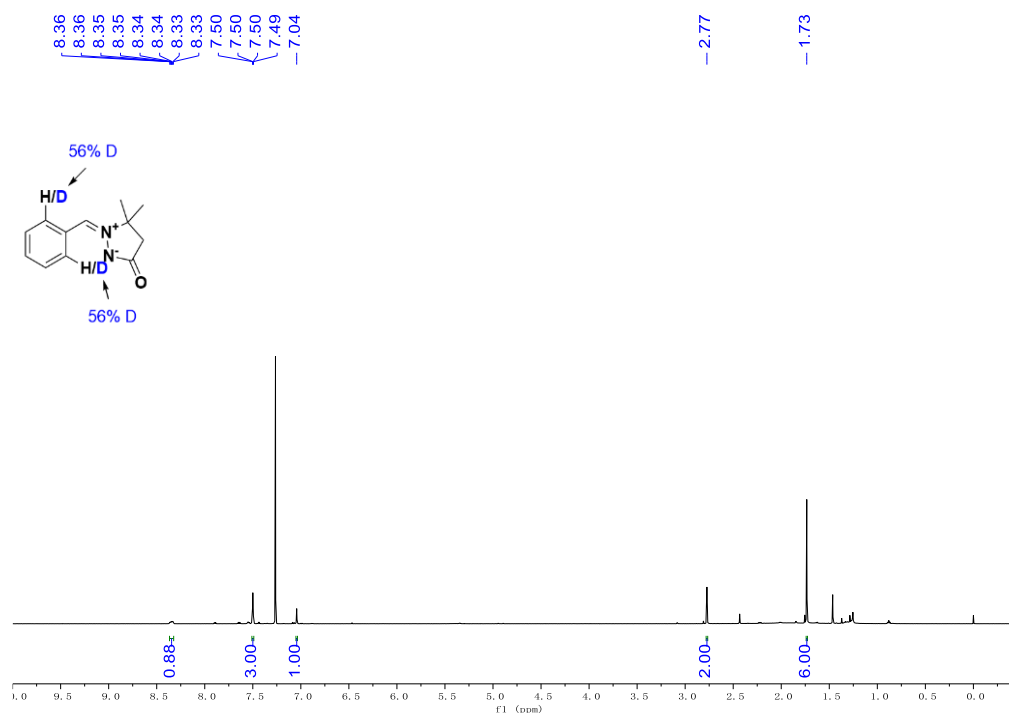

## 2) Competition Experiment.

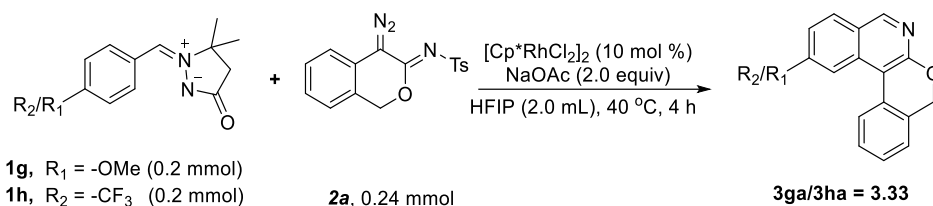

To a mixture of **1g** (46.5 mg, 0.2 mmol, 1.0 equiv), **1h** (54.1 mg, 0.2 mmol, 1.0 equiv),  $[\text{Cp}^*\text{RhCl}_2]_2$  (12.4 mg, 0.02 mmol, 10 mol %), and NaOAc (32.8 mg, 0.4 mmol, 2 equiv) was added **2a** (78.6 mg, 0.24 mmol, 1.2 equiv) and HFIP (2.0 mL, 0.1 M). The resulting mixture was stirred at 40 °C for 4 h. After the reaction was completed, EA was added and the mixture was filtered through a pad of Celite which was subsequently washed with EA. The combined organic layer was concentrated under vacuum and purified by flash chromatography to yield the mixture of **3ga** and **3ha**. The ratio of products was calculated according to  $^1\text{H}$  NMR spectra.

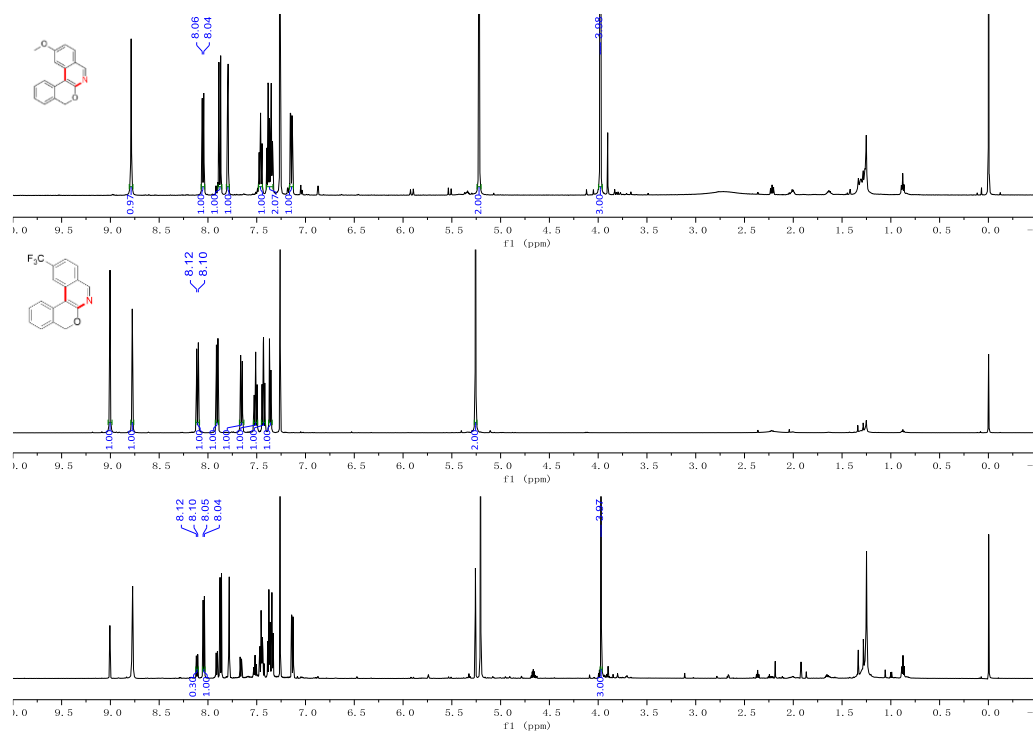

## 3) KIE Experiment.

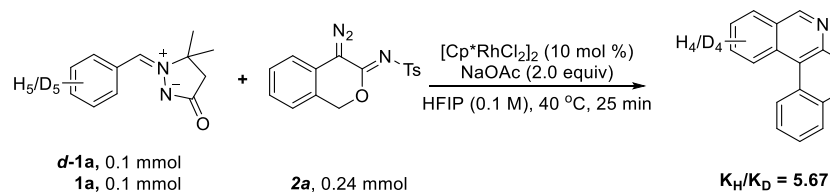

Compounds **1a** (20.3 mg, 0.1 mmol, 1.0 equiv) and **d<sup>5</sup>-1a** (20.8 mg, 0.1 mmol, 1.0 equiv) were successively added to a mixture of  $[\text{Cp}^*\text{RhCl}_2]_2$  (12.4 mg, 0.02 mmol, 10 mol%), NaOAc

(32.9 mg, 0.4 mmol, 2 equiv), and **2a** (78.9 mg, 0.24 mmol, 1.2 equiv) in HFIP (2.0 mL, 0.1M). The resulting mixture was stirred at 40 °C for 25 min. Then the reaction was stopped and filtered through a pad of Celite which was subsequently washed with EA (10 mL × 3) and the combined organic layer was concentrated under reduced pressure. The mixture of **3aa** and *d*<sup>4</sup>-**3aa** was isolated by flash chromatography eluting with Hexane/EA from 20:1 to 10:1. The KIE value was determined using <sup>1</sup>H NMR.

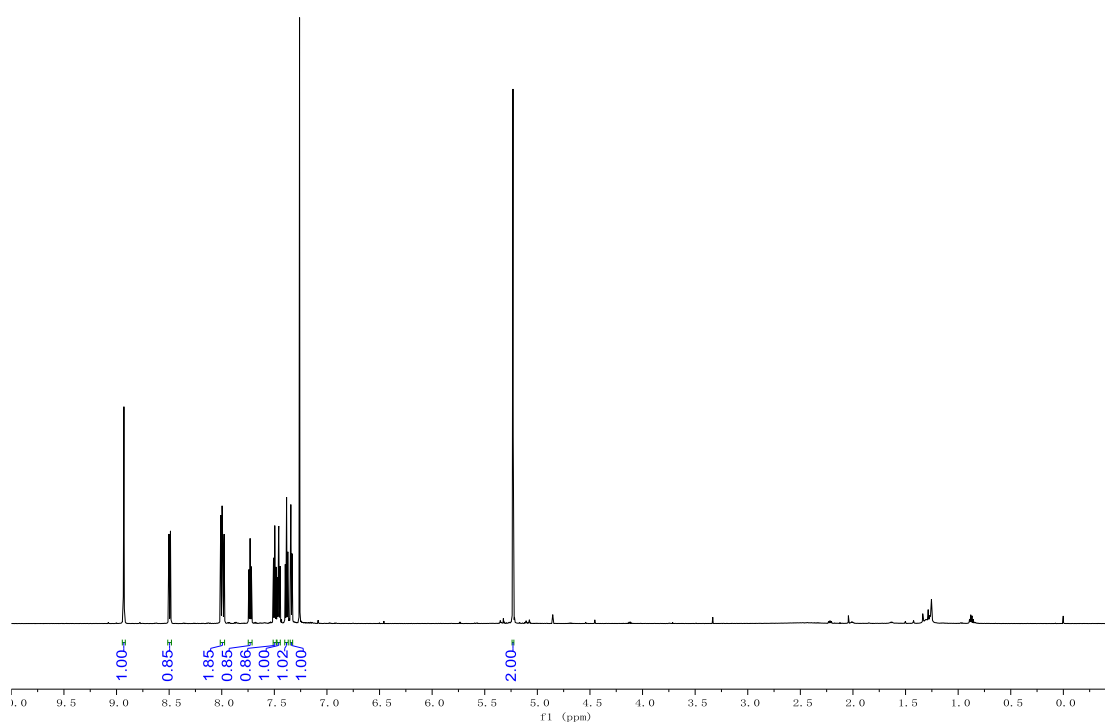

$$k_H/k_D = 0.85/(1-0.85) = 5.67$$

#### IV. General Synthetic Procedures and Characterization Data

##### (a) General procedure for the synthesis of products **3aa**

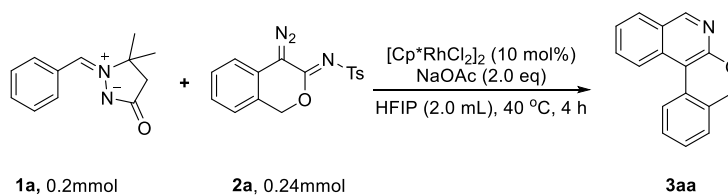

A pressure tube was charged with azomethine imine **1a** (0.2 mmol), **2a** (0.24 mmol), [Cp\**RhCl*<sub>2</sub>]<sub>2</sub> (12.3 mg, 0.02 mmol), NaOAc (32.8 mg, 0.4 mmol) and HFIP (2

mL). The reaction mixture was stirred at 40 °C for 4 h. After the reaction was completed, EA was added and the mixture was filtered through a pad of Celite which was subsequently washed with EA. The combined organic layer was concentrated under reduced pressure and the residue was purified by silica gel chromatography using PE/EA (10:1) to afford the desired product **3aa**.

### (b) Characterization of compounds

#### **5H-isochromeno[3,4-c]isoquinoline(3aa).**

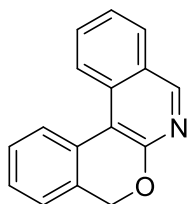

It was obtained as a white solid (75% yield); mp 110.1-111.7 °C; <sup>1</sup>H NMR (500 MHz, Chloroform-*d*) δ 8.92 (s, 1H), 8.48 (d, *J* = 8.6 Hz, 1H), 7.98 (t, *J* = 8.7 Hz, 2H), 7.72 (ddd, *J* = 8.5, 6.8, 1.3 Hz, 1H), 7.49 (ddd, *J* = 8.0, 6.9, 0.9 Hz, 1H), 7.45 (td, *J* = 7.7, 1.4 Hz, 1H), 7.37 (td, *J* = 7.4, 1.1 Hz, 1H), 7.34 – 7.31 (m, 1H), 5.22 (s, 2H); <sup>13</sup>C NMR (126 MHz, Chloroform-*d*) δ 159.1, 151.6, 134.3, 133.0, 131.3, 129.8, 128.8, 128.3, 127.8, 126.9, 126.4, 125.4, 124.8, 123.7, 109.5, 69.5; LRMS (ESI): *m/z* 252.1 [*M* + *H*]<sup>+</sup>; HRMS (ESI): calcd for C<sub>16</sub>H<sub>12</sub>NO<sup>+</sup> [*M* + *H*]<sup>+</sup>, 234.0913; found, 234.0910.

#### **11-fluoro-5H-isochromeno[3,4-c]isoquinoline(3ba).**

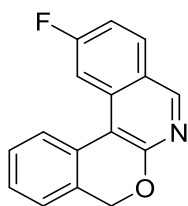

It was obtained as a yellow solid (75% yield); mp 131.4-133.9 °C; <sup>1</sup>H NMR (500 MHz, Chloroform-*d*) δ 8.88 (s, 1H), 8.08 (dd, *J* = 11.3, 2.4 Hz, 1H), 7.98 (dd, *J* = 9.0, 5.9 Hz, 1H), 7.94 (d, *J* = 7.7 Hz, 1H), 7.47 (td, *J* = 7.6, 1.4 Hz, 1H), 7.39 (td, *J* = 7.4, 1.1 Hz, 1H), 7.33 (dd, *J* = 7.6, 1.3 Hz, 1H), 7.28 – 7.23 (m, 2H), 5.22 (s, 2H); <sup>13</sup>C NMR (126 MHz, Chloroform-*d*) δ 164.6 (d, *J* = 252.2 Hz), 159.8, 151.4, 135.8 (d, *J* = 10.9 Hz), 132.8, 131.8 (d, *J* = 10.4 Hz), 129.5, 128.5, 128.0, 125.7, 125.5, 124.1, 115.4 (d, *J* =



25.7 Hz), 109.2 (d,  $J = 5.6$  Hz), 107.8 (d,  $J = 23.3$  Hz), 69.5.  $^{19}\text{F}$  NMR (471 MHz, Chloroform-*d*)  $\delta$  -105.5; LRMS (ESI):  $m/z$  252.1  $[\text{M} + \text{H}]^+$ ; HRMS (ESI): calcd for  $\text{C}_{16}\text{H}_{10}\text{FNO}^+$   $[\text{M} + \text{H}]^+$ , 252.0819; found, 252.0821.

**11-bromo-5H-isochromeno[3,4-c]isoquinoline(3ca).**

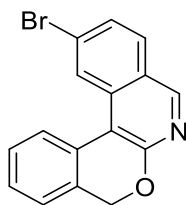

It was obtained as a white solid (82% yield); mp 157.6-158.7 °C;  $^1\text{H}$  NMR (500 MHz, Chloroform-*d*)  $\delta$  8.88 (d,  $J = 0.8$  Hz, 1H), 8.66 – 8.62 (m, 1H), 7.93 (dd,  $J = 7.9, 1.1$  Hz, 1H), 7.83 (d,  $J = 8.7$  Hz, 1H), 7.56 (dd,  $J = 8.7, 1.8$  Hz, 1H), 7.49 (td,  $J = 7.6, 1.4$  Hz, 1H), 7.40 (td,  $J = 7.4, 1.1$  Hz, 1H), 7.36 – 7.30 (m, 1H), 5.22 (s, 2H);  $^{13}\text{C}$  NMR (126 MHz, Chloroform-*d*)  $\delta$  159.9, 151.7, 135.3, 133.0, 130.3, 129.4, 128.8, 128.5, 128.3, 126.9, 126.2, 126.2, 125.6, 125.3, 108.8, 69.7; LRMS (ESI):  $m/z$  312.1  $[\text{M} + \text{H}]^+$ ; HRMS (ESI): calcd for  $\text{C}_{16}\text{H}_{10}\text{BrNO}^+$   $[\text{M} + \text{H}]^+$ , 312.0019; found, 312.0010.

**11-chloro-5H-isochromeno[3,4-c]isoquinoline(3da).**

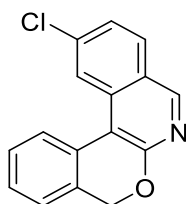

It was obtained as a white solid (78% yield); mp 157.7-159.0 °C;  $^1\text{H}$  NMR (500 MHz, Chloroform-*d*)  $\delta$  8.88 (d,  $J = 0.8$  Hz, 1H), 8.44 (d,  $J = 1.9$  Hz, 1H), 7.91 (t,  $J = 8.3$  Hz, 2H), 7.48 (td,  $J = 7.6, 1.4$  Hz, 1H), 7.44 – 7.37 (m, 2H), 7.35 – 7.30 (m, 1H), 5.22 (s, 2H).  $^{13}\text{C}$  NMR (126 MHz, Chloroform-*d*)  $\delta$  159.2, 150.8, 137.7, 134.5, 132.4, 129.9, 128.8, 128.2, 127.7, 125.6, 125.5, 125.0, 124.5, 122.4, 69.1; LRMS (ESI):  $m/z$  268.1  $[\text{M} + \text{H}]^+$ ; HRMS (ESI): calcd for  $\text{C}_{16}\text{H}_{10}\text{ClNO}^+$   $[\text{M} + \text{H}]^+$ , 268.0518; found, 268.0524.

**5H-isochromeno[3,4-c]isoquinoline-11-carbonitrile(3ea).**

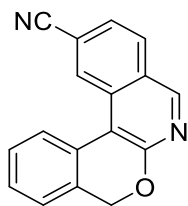

It was obtained as a yellow solid (56% yield); mp 223.7-225.6 °C;  $^1\text{H}$  NMR (500 MHz, Chloroform-*d*)  $\delta$  9.00 (s, 1H), 8.84 (d,  $J = 1.3$  Hz, 1H), 8.08 (d,  $J = 8.4$  Hz, 1H), 7.87 (dd,  $J = 7.8, 1.1$  Hz, 1H), 7.63 (dd,  $J = 8.3, 1.4$  Hz, 1H), 7.53 (td,  $J = 7.6, 1.3$  Hz, 1H), 7.45 (td,  $J = 7.5, 1.1$  Hz, 1H), 7.37 (dd,  $J = 7.5, 1.3$  Hz, 1H), 5.27 (s, 2H);  $^{13}\text{C}$  NMR (126 MHz, Chloroform-*d*)  $\delta$  160.2, 151.8, 133.2, 133.1, 130.2, 130.1, 129.0, 128.9, 128.7, 127.27, 126.5, 125.9, 125.4, 118.8, 114.9, 109.9, 69.8; LRMS (ESI):  $m/z$  259.1  $[\text{M} + \text{H}]^+$ ; HRMS (ESI): calcd for  $\text{C}_{17}\text{H}_{10}\text{N}_2\text{O}^+$   $[\text{M} + \text{H}]^+$ , 259.0866; found, 259.0867.

**11-methyl-5H-isochromeno[3,4-c]isoquinoline(3fa).**

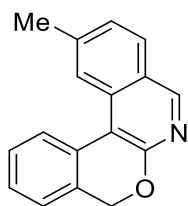

It was obtained as a white solid (81% yield); mp 110.1-112.3 °C;  $^1\text{H}$  NMR (500 MHz, Chloroform-*d*)  $\delta$  8.84 (d,  $J = 0.8$  Hz, 1H), 8.25 (s, 1H), 8.00 (dd,  $J = 7.9, 1.0$  Hz, 1H), 7.86 (d,  $J = 8.3$  Hz, 1H), 7.46 (td,  $J = 7.6, 1.5$  Hz, 1H), 7.37 (td,  $J = 7.4, 1.1$  Hz, 1H), 7.32 (ddd,  $J = 8.2, 3.8, 1.4$  Hz, 2H), 5.20 (s, 2H), 2.57 (s, 3H);  $^{13}\text{C}$  NMR (126 MHz,  $\text{CDCl}_3$ )  $\delta$  159.4, 151.3, 141.9, 134.7, 133.1, 130.1, 128.7, 128.4, 127.7, 127.2, 126.4, 125.4, 125.4, 122.8, 109.0, 77.4, 77.2, 76.9, 69.6, 22.7; LRMS (ESI):  $m/z$  248.1  $[\text{M} + \text{H}]^+$ ; HRMS (ESI): calcd for  $\text{C}_{17}\text{H}_{13}\text{NO}^+$   $[\text{M} + \text{H}]^+$ , 248.1070; found, 248.1067.

**11-methoxy-5H-isochromeno[3,4-c]isoquinoline(3ga).**

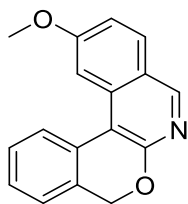

It was obtained as a white solid (69% yield); mp 150.0-151.9 °C; <sup>1</sup>H NMR (500 MHz, Chloroform-*d*) δ 8.79 (s, 1H), 8.05 (dd, *J* = 7.8, 1.1 Hz, 1H), 7.88 (d, *J* = 9.0 Hz, 1H), 7.80 (d, *J* = 2.3 Hz, 1H), 7.46 (td, *J* = 7.5, 1.5 Hz, 1H), 7.40 – 7.33 (m, 2H), 7.14 (dd, *J* = 9.0, 2.3 Hz, 1H), 5.22 (s, 2H), 3.98 (s, 3H); <sup>13</sup>C NMR (126 MHz, Chloroform-*d*) δ 162.0, 158.7, 149.7, 136.0, 132.4, 130.2, 129.5, 127.9, 127.2, 125.1, 124.8, 122.0, 117.3, 108.5, 101.9, 69.1, 55.1; LRMS (ESI): *m/z* 264.2 [M + H]<sup>+</sup>; HRMS (ESI): calcd for C<sub>17</sub>H<sub>13</sub>NO<sub>2</sub><sup>+</sup> [M + H]<sup>+</sup>, 264.1019; found, 264.1015.

**11-(trifluoromethyl)-5H-isochromeno[3,4-*c*]isoquinoline(3ha).**

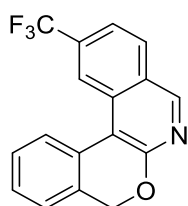

It was obtained as a white solid (80% yield); mp 142.2-144.6 °C; <sup>1</sup>H NMR (500 MHz, Chloroform-*d*) δ 9.00 (s, 1H), 8.78 (s, 1H), 8.11 (d, *J* = 8.5 Hz, 1H), 7.91 (d, *J* = 7.8 Hz, 1H), 7.66 (dd, *J* = 8.5, 1.6 Hz, 1H), 7.51 (td, *J* = 7.6, 1.4 Hz, 1H), 7.43 (td, *J* = 7.5, 1.1 Hz, 1H), 7.36 (dd, *J* = 7.5, 1.3 Hz, 1H), 5.26 (s, 2H); <sup>13</sup>C NMR (126 MHz, Chloroform-*d*) δ 159.4, 151.1, 132.8, 132.6, 132.6– 131.8 (q, *J* = 32.2 Hz), 129.5, 128.6, 128.4, 128.0, 127.0, 126.7– 120.2 (q, *J* = 273.4 Hz), 125.8, 125.2, 121.1 (q, *J* = 4.6 Hz), 120.2 – 119.9 (q, *J* = 2.9 Hz), 109.9, 69.2; <sup>19</sup>F NMR (471 MHz, Chloroform-*d*) δ -62.9; LRMS (ESI): *m/z* 302.1 [M + H]<sup>+</sup>; HRMS (ESI): calcd for C<sub>17</sub>H<sub>10</sub>F<sub>3</sub>NO<sup>+</sup> [M + H]<sup>+</sup>, 302.0787; found, 302.0782.

**Methyl-5H-isochromeno[3,4-*c*]isoquinoline-11-carboxylate(3ia).**

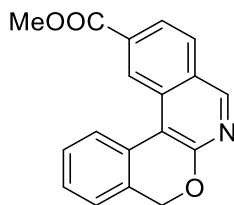

It was obtained as a yellow solid (74% yield); mp 165.5-167.2 °C; <sup>1</sup>H NMR (500 MHz, Chloroform-*d*) δ 9.20 (d, *J* = 1.2 Hz, 1H), 8.97 (d, *J* = 0.9 Hz, 1H), 8.04 (dd, *J* = 8.6, 1.4 Hz, 1H), 8.01 (dd, *J* = 8.6, 0.8 Hz, 1H), 7.96 (dd, *J* = 7.8, 1.1 Hz, 1H), 7.50 (td, *J* =

7.6, 1.4 Hz, 1H), 7.41 (td,  $J = 7.5, 1.1$  Hz, 1H), 7.34 (ddd,  $J = 7.5, 1.5, 0.7$  Hz, 1H), 5.24 (s, 2H), 4.00 (s, 3H).  $^{13}\text{C}$  NMR (126 MHz, Chloroform-*d*)  $\delta$  166.7, 159.6, 151.5, 133.5, 133.0, 132.2, 129.3, 129.0, 128.8, 128.3, 128.1, 126.7, 126.6, 125.5, 124.2, 110.5, 69.6, 52.7; LRMS (ESI):  $m/z$  292.2  $[\text{M} + \text{H}]^+$ ; HRMS (ESI): calcd for  $\text{C}_{18}\text{H}_{13}\text{NO}_3^+$   $[\text{M} + \text{H}]^+$ , 292.0968; found, 292.0962.

**11-phenyl-5H-isochromeno[3,4-c]isoquinoline(3ja).**

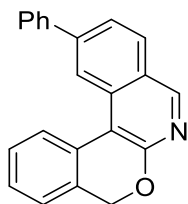

It was obtained as a yellow oil (85% yield);  $^1\text{H}$  NMR (500 MHz, Chloroform-*d*)  $\delta$  8.96 (s, 1H), 8.68 (d,  $J = 1.5$  Hz, 1H), 8.08 – 8.03 (m, 2H), 7.78 – 7.71 (m, 3H), 7.56 – 7.52 (m, 2H), 7.51 – 7.44 (m, 2H), 7.41 (td,  $J = 7.4, 1.2$  Hz, 1H), 7.36 (dd,  $J = 7.4, 1.4$  Hz, 1H), 5.26 (s, 2H);  $^{13}\text{C}$  NMR (126 MHz, Chloroform-*d*)  $\delta$  159.6, 151.4, 144.0, 140.6, 134.6, 133.0, 129.9, 129.3, 129.1, 128.5, 128.2, 127.81, 127.7, 126.3, 125.9, 125.5, 124.7, 121.6, 109.6, 69.5; LRMS (ESI):  $m/z$  310.2  $[\text{M} + \text{H}]^+$ ; HRMS (ESI): calcd for  $\text{C}_{22}\text{H}_{15}\text{NO}^+$   $[\text{M} + \text{H}]^+$ , 310.1233; found, 310.1226.

**11-(tert-butyl)-5H-isochromeno[3,4-c]isoquinoline(3ka).**

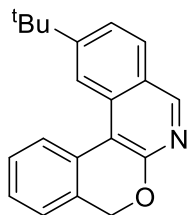

It was obtained as a colorless oil (88% yield);  $^1\text{H}$  NMR (500 MHz, Chloroform-*d*)  $\delta$  8.89 (s, 1H), 8.48 (d,  $J = 1.7$  Hz, 1H), 8.03 (dd,  $J = 7.8, 1.0$  Hz, 1H), 7.94 (d,  $J = 8.7$  Hz, 1H), 7.60 (dd,  $J = 8.7, 1.7$  Hz, 1H), 7.50 (td,  $J = 7.5, 1.6$  Hz, 1H), 7.42 – 7.35 (m, 2H), 5.24 (s, 2H), 1.47 (s, 9H);  $^{13}\text{C}$  NMR (126 MHz, Chloroform-*d*)  $\delta$  159.4, 154.5, 151.1, 134.5, 133.2, 130.3, 128.4, 127.7, 126.2, 125.5, 125.4, 123.9, 118.9, 109.6, 69.6, 35.7, 31.2; LRMS (ESI):  $m/z$  277.2  $[\text{M} + \text{H}]^+$ ; HRMS (ESI): calcd for  $\text{C}_{20}\text{H}_{19}\text{NO}^+$   $[\text{M} + \text{H}]^+$ , 277.1335; found, 277.1331.

**N,N-dimethyl-5H-isochromeno[3,4-c]isoquinolin-11-amine(3la).**

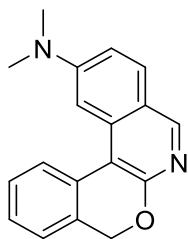

It was obtained as a yellow solid (67% yield); mp 141.2-143.1 °C; <sup>1</sup>H NMR (500 MHz, Chloroform-*d*) δ 8.67 (s, 1H), 8.18 (d, *J* = 7.8 Hz, 1H), 7.82 (d, *J* = 9.2 Hz, 1H), 7.50 (d, *J* = 2.4 Hz, 1H), 7.45 (td, *J* = 7.5, 1.9 Hz, 1H), 7.39 – 7.33 (m, 2H), 7.12 (dd, *J* = 9.2, 2.4 Hz, 1H), 5.22 (s, 2H), 3.20 (s, 6H); <sup>13</sup>C NMR (126 MHz, Chloroform-*d*) δ 152.6, 148.8, 132.5, 130.5, 130.4, 128.2, 127.3, 125.4, 124.7, 119.9, 114.5, 100.8, 69.6, 40.4; LRMS (ESI): *m/z* 290.2 [M + H]<sup>+</sup>; HRMS (ESI): calcd for C<sub>20</sub>H<sub>19</sub>NO<sup>+</sup> [M + H]<sup>+</sup>, 209.1539; found, 290.1534.

**9-bromo-5H-isochromeno[3,4-c]isoquinoline(3ma).**

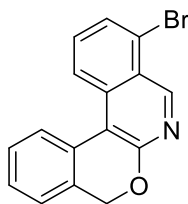

It was obtained as a white solid (83% yield); mp 157.6-158.7 °C; <sup>1</sup>H NMR (500 MHz, Chloroform-*d*) δ 9.29 (d, *J* = 0.9 Hz, 1H), 8.41 (dd, *J* = 8.7, 1.0 Hz, 1H), 7.88 (dd, *J* = 7.7, 1.2 Hz, 1H), 7.69 (dd, *J* = 7.4, 0.9 Hz, 1H), 7.49 (dd, *J* = 8.6, 7.4 Hz, 1H), 7.43 (td, *J* = 7.6, 1.5 Hz, 1H), 7.38 (td, *J* = 7.4, 1.2 Hz, 1H), 7.32 (ddd, *J* = 7.4, 1.6, 0.8 Hz, 1H), 5.21 (s, 2H).

; <sup>13</sup>C NMR (126 MHz, Chloroform-*d*) δ 159.6, 151.3, 135.8, 133.1, 131.3, 129.3, 129.0, 128.4, 128.1, 126.7, 125.5, 124.9, 123.6, 123.6, 109.2, 69.6; LRMS (ESI): *m/z* 312.1 [M + H]<sup>+</sup>; HRMS (ESI): calcd for C<sub>16</sub>H<sub>10</sub>BrNO<sup>+</sup> [M + H]<sup>+</sup>, 312.0019; found, 312.0014.

**9-methyl-5H-isochromeno[3,4-c]isoquinoline(3na).**

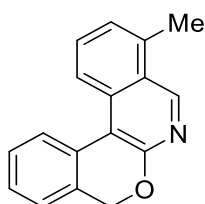

It was obtained as a white solid (72% yield); mp 167.2-168.8 °C; <sup>1</sup>H NMR (500 MHz, Chloroform-*d*) δ 9.15 (s, 1H), 8.36 (d, *J* = 8.7 Hz, 1H), 7.99 (d, *J* = 7.7 Hz, 1H), 7.61 (dd, *J* = 8.7, 7.0 Hz, 1H), 7.47 (td, *J* = 7.5, 1.5 Hz, 1H), 7.39 (td, *J* = 7.4, 1.1 Hz, 1H), 7.35 (dd, *J* = 7.6, 1.4 Hz, 1H), 7.29 (d, *J* = 6.3 Hz, 1H), 5.24 (s, 2H), 2.82 (s, 3H); <sup>13</sup>C NMR (126 MHz, Chloroform-*d*) δ 158.9, 148.4, 136.5, 134.7, 133.1, 131.1, 123.0, 128.3, 127.7, 126.77, 125.9, 125.8, 125.4, 122.1, 109.7, 69.5, 19.0; LRMS (ESI): *m/z* 248.2 [M + H]<sup>+</sup>; HRMS (ESI): calcd for C<sub>17</sub>H<sub>13</sub>NO<sup>+</sup> [M + H]<sup>+</sup>, 248.1070; found, 248.1063.

**10-bromo-5H-isochromeno[3,4-c]isoquinoline(3oa).**

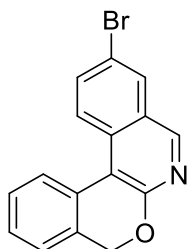

It was obtained as a white solid (85% yield); mp 123.8-124.8 °C; <sup>1</sup>H NMR (500 MHz, Chloroform-*d*) δ 8.83 (d, *J* = 0.8 Hz, 1H), 8.34 (d, *J* = 9.1 Hz, 1H), 8.10 (d, *J* = 2.1 Hz, 1H), 7.89 (dd, *J* = 7.8, 1.1 Hz, 1H), 7.75 (dd, *J* = 9.1, 2.1 Hz, 1H), 7.45 (td, *J* = 7.6, 1.5 Hz, 1H), 7.39 (td, *J* = 7.5, 1.2 Hz, 1H), 7.33 (dd, *J* = 7.5, 1.4 Hz, 1H), 5.22 (s, 2H); <sup>13</sup>C NMR (126 MHz, Chloroform-*d*) δ 159.4, 150.6, 134.6, 133.1, 132.8, 130.7, 129.4, 128.6, 128.3, 128.0, 126.4, 125.7, 125.6, 118.3, 109.8, 69.6; LRMS (ESI): *m/z* 312.1 [M + H]<sup>+</sup>; HRMS (ESI): calcd for C<sub>16</sub>H<sub>10</sub>BrNO<sup>+</sup> [M + H]<sup>+</sup>, 312.0019; found, 312.0020.

**10-methyl-5H-isochromeno[3,4-c]isoquinoline(3pa).**

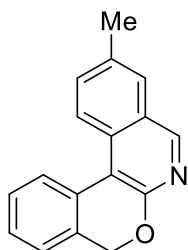

It was obtained as a white solid (88% yield); mp 169.8-171.1 °C; <sup>1</sup>H NMR (500 MHz, Chloroform-*d*) δ 8.83 (s, 1H), 8.37 (d, *J* = 8.7 Hz, 1H), 7.97 (dd, *J* = 7.8, 1.0 Hz, 1H), 7.74 – 7.69 (m, 1H), 7.54 (dd, *J* = 8.8, 1.9 Hz, 1H), 7.43 (td, *J* = 7.6, 1.5 Hz, 1H), 7.36

(td,  $J = 7.4, 1.2$  Hz, 1H), 7.31 (dd,  $J = 7.5, 1.4$  Hz, 1H), 5.20 (s, 2H), 2.52 (d,  $J = 1.0$  Hz, 3H);  $^{13}\text{C}$  NMR (126 MHz, Chloroform- $d$ )  $\delta$  158.6, 150.9, 134.5, 133.6, 133.0, 132.5, 129.9, 128.3, 127.7, 127.5, 127.2, 126.3, 125.3, 123.5, 109.4, 69.5, 21.3; LRMS (ESI):  $m/z$  248.2  $[\text{M} + \text{H}]^+$ ; HRMS (ESI): calcd for  $\text{C}_{17}\text{H}_{13}\text{NO}^+$   $[\text{M} + \text{H}]^+$ , 248.1070; found, 248.1064.

**N-(5H-isochromeno[3,4-c]isoquinolin-11-yl)acetamide(3qa).**

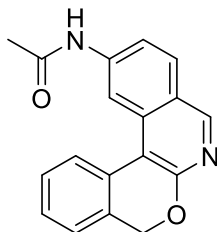

It was obtained as a yellow solid (70% yield); mp 116.7-118.1 °C;  $^1\text{H}$  NMR (500 MHz, Methanol- $d_4$ )  $\delta$  8.97 (d,  $J = 2.1$  Hz, 1H), 8.72 (s, 1H), 8.06 (d,  $J = 7.8$  Hz, 1H), 7.96 (d,  $J = 8.8$  Hz, 1H), 7.53 (dd,  $J = 8.8, 1.9$  Hz, 1H), 7.49 – 7.44 (m, 1H), 7.41 – 7.38 (m, 2H), 5.17 (s, 2H), 2.23 (s, 3H);  $^{13}\text{C}$  NMR (126 MHz, Methanol- $d_4$ )  $\delta$  172.2, 160.4, 151.4, 143.1, 136.4, 134.1, 130.9, 130.6, 129.5, 129.0, 127.0, 126.3, 125.1, 112.0, 112.7, 110.6, 70.4, 24.2; LRMS (ESI):  $m/z$  291.2  $[\text{M} + \text{H}]^+$ ; HRMS (ESI): calcd for  $\text{C}_{18}\text{H}_{14}\text{N}_2\text{O}_2^+$   $[\text{M} + \text{H}]^+$ , 291.1128; found, 291.1131.

**9H-[1,3]dioxolo[4,5-f]isochromeno[3,4-c]isoquinoline(3ra).**

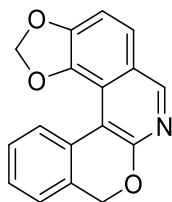

It was obtained as a yellow solid (74% yield); mp 64.3-65.0 °C;  $^1\text{H}$  NMR (500 MHz, Chloroform- $d$ )  $\delta$  8.87 (s, 1H), 7.65 (d,  $J = 8.6$  Hz, 1H), 7.64 – 7.60 (m, 1H), 7.42 (td,  $J = 7.6, 1.5$  Hz, 1H), 7.35 (td,  $J = 7.4, 1.2$  Hz, 1H), 7.29 – 7.27 (m, 1H), 7.23 (d,  $J = 8.6$  Hz, 1H), 6.19 (s, 2H), 5.24 (s, 2H);  $^{13}\text{C}$  NMR (126 MHz, Chloroform- $d$ )  $\delta$  159.9, 152.6, 148.8, 139.4, 131.1, 129.4, 128.4, 127.7, 127.4, 125.2, 124.4, 124.3, 120.3, 110.0, 105.2, 101.5, 69.8; LRMS (ESI):  $m/z$  278.2  $[\text{M} + \text{H}]^+$ ; HRMS (ESI): calcd for  $\text{C}_{17}\text{H}_{11}\text{NO}_3^+$   $[\text{M} + \text{H}]^+$ , 278.0812; found, 278.0809.

**8H-isochromeno[3,4-c][2,6]naphthyridine(3sa).**

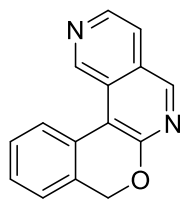

It was obtained as a yellow solid (56% yield); mp 145.7-147.6 °C;  $^1\text{H}$  NMR (500 MHz, Chloroform-*d*)  $\delta$  9.96 (s, 1H), 9.01 (s, 1H), 8.62 (d,  $J = 5.7$  Hz, 1H), 7.99 (d,  $J = 7.7$  Hz, 1H), 7.82 (d,  $J = 5.6$  Hz, 1H), 7.52 (td,  $J = 7.6, 1.3$  Hz, 1H), 7.49 – 7.43 (m, 1H), 7.37 (d,  $J = 7.5$  Hz, 1H), 5.30 (s, 2H);  $^{13}\text{C}$  NMR (126 MHz, Chloroform-*d*)  $\delta$  159.8, 150.8, 148.8, 141.6, 133.0, 128.9, 128.9, 128.6, 128.3, 128.3, 127.2, 125.7, 120.1, 109.5, 69.7; LRMS (ESI):  $m/z$  235.1  $[\text{M} + \text{H}]^+$ ; HRMS (ESI): calcd for  $\text{C}_{15}\text{H}_{10}\text{N}_2\text{O}^+$   $[\text{M} + \text{H}]^+$ , 235.0866; found, 235.0869.

**5H,9H-chromeno[2,3-d]isochromeno[3,4-b]pyridin-9-one(3ta)**

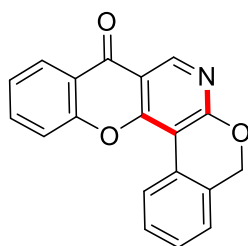

**3ta**

It was obtained as a white solid (85% yield); mp 172.2-175.4 °C;  $^1\text{H}$  NMR (500 MHz, Chloroform-*d*)  $\delta$  9.16 (s, 1H), 8.48 (dd,  $J = 8.0, 1.3$  Hz, 1H), 8.35 (dd,  $J = 7.9, 1.7$  Hz, 1H), 7.83 – 7.76 (m, 1H), 7.62 (dd,  $J = 8.5, 1.1$  Hz, 1H), 7.51 (td,  $J = 7.7, 1.4$  Hz, 1H), 7.47 (ddd,  $J = 8.2, 7.2, 1.0$  Hz, 1H), 7.44 (td,  $J = 7.5, 1.2$  Hz, 1H), 7.29 – 7.27 (m, 1H), 5.40 (s, 2H);  $^{13}\text{C}$  NMR (126 MHz, Chloroform-*d*)  $\delta$  175.64, 165.77, 159.43, 155.77, 149.15, 135.45, 130.69, 129.10, 128.88, 126.83, 126.80, 126.33, 125.30, 124.96, 122.30, 117.96, 114.83, 104.64, 69.71. LRMS (ESI):  $m/z$  302.0  $[\text{M} + \text{H}]^+$ ; HRMS (ESI): calcd for  $\text{C}_{19}\text{H}_{11}\text{NO}_3^+$   $[\text{M} + \text{H}]^+$ , 302.0812; found, 302.0817.

**7H-isochromeno[3,4-b]thieno[2,3-d]pyridine(3ua)**

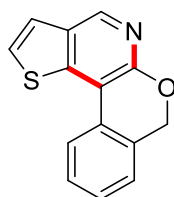



It was obtained as a yellow solid (65% yield); mp 107.4-109.2 °C; <sup>1</sup>H NMR (500 MHz, Chloroform-*d*) δ 8.71 (s, 1H), 8.12 (dd, *J* = 7.9, 1.0 Hz, 1H), 7.49 (td, *J* = 7.7, 1.3 Hz, 1H), 7.42 (d, *J* = 0.9 Hz, 2H), 7.38 (td, *J* = 7.5, 1.1 Hz, 1H), 7.27 – 7.24 (m, 1H), 5.32 (s, 2H); <sup>13</sup>C NMR (126 MHz, Chloroform-*d*) δ 159.56, 146.08, 144.47, 135.59, 133.42, 130.37, 129.97, 129.96, 127.24, 126.30, 125.60, 123.96, 112.75, 70.43. LRMS (ESI): *m/z* 240.0 [M + H]<sup>+</sup>; HRMS (ESI): calcd for C<sub>14</sub>H<sub>9</sub>NOS<sup>+</sup> [M + H]<sup>+</sup>, 230.0478; found, 230.0477.

**3-methoxy-5H-isochromeno[3,4-c]isoquinoline(3ab).**

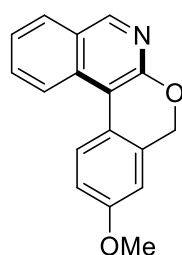

It was obtained as a yellow oil (84% yield); <sup>1</sup>H NMR (500 MHz, Chloroform-*d*) δ 8.86 (d, *J* = 0.8 Hz, 1H), 8.43 (dd, *J* = 8.7, 1.0 Hz, 1H), 7.95 (dt, *J* = 8.3, 0.9 Hz, 1H), 7.91 (d, *J* = 8.6 Hz, 1H), 7.69 (ddd, *J* = 8.5, 6.8, 1.4 Hz, 1H), 7.46 (ddd, *J* = 8.0, 6.8, 1.0 Hz, 1H), 6.98 (dd, *J* = 8.6, 2.7 Hz, 1H), 6.86 (d, *J* = 2.7 Hz, 1H), 5.18 (s, 2H), 3.87 (s, 3H); <sup>13</sup>C NMR (126 MHz, Chloroform-*d*) δ 159.4, 158.4, 150.5, 134.8, 134.0, 130.9, 128.7, 127.7, 126.9, 124.7, 123.7, 122.5, 113.7, 111.0, 109.5, 69.5, 55.5; LRMS (ESI): *m/z* 264.1 [M + H]<sup>+</sup>; HRMS (ESI): calcd for C<sub>17</sub>H<sub>13</sub>NO<sub>2</sub><sup>+</sup> [M + H]<sup>+</sup>, 264.1019; found, 264.1016.

**3-methyl-5H-isochromeno[3,4-c]isoquinoline(3ac).**

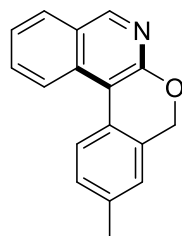

It was obtained as a white solid (81% yield); mp 88.3-90.1 °C; <sup>1</sup>H NMR (500 MHz, Chloroform-*d*) δ 8.90 (s, 1H), 8.47 (d, *J* = 8.6 Hz, 1H), 7.97 (dt, *J* = 8.3, 0.9 Hz, 1H), 7.89 (d, *J* = 7.9 Hz, 1H), 7.71 (ddd, *J* = 8.4, 6.8, 1.3 Hz, 1H), 7.48 (ddd, *J* = 8.0, 6.8, 1.1 Hz, 1H), 7.28 – 7.24 (d, 1H), 7.16 – 7.13 (m, 1H), 5.19 (s, 2H), 2.43 (s, 3H); <sup>13</sup>C

NMR (126 MHz, Chloroform-*d*)  $\delta$  151.0, 138.0, 134.2, 133.1, 131.1, 129.0, 128.8, 127.0, 126.8, 126.3, 126.1, 124.7, 123.8, 109.6, 69.5, 21.2; LRMS (ESI):  $m/z$  248.2 [M + H]<sup>+</sup>; HRMS (ESI): calcd for C<sub>17</sub>H<sub>13</sub>NO<sup>+</sup> [M + H]<sup>+</sup>, 248.1070; found, 248.1074.

**3-fluoro-5H-isochromeno[3,4-c]isoquinoline(3ad).**

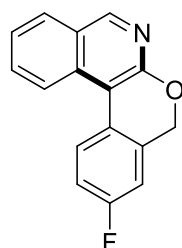

It was obtained as a white solid (72% yield); mp 105.4-107.2 °C; <sup>1</sup>H NMR (500 MHz, Methanol-*d*<sub>4</sub>)  $\delta$  8.81 (s, 1H), 8.37 – 8.30 (m, 1H), 8.00 (dt,  $J$  = 8.3, 0.9 Hz, 1H), 7.93 – 7.85 (m, 1H), 7.73 (ddd,  $J$  = 8.5, 6.8, 1.4 Hz, 1H), 7.49 (ddd,  $J$  = 7.9, 6.7, 0.9 Hz, 1H), 7.14 (t,  $J$  = 8.3 Hz, 2H), 5.12 (s, 2H); <sup>13</sup>C NMR (126 MHz, Methanol-*d*<sub>4</sub>)  $\delta$  162.34 (d,  $J$  = 247.9 Hz), 158.14, 150.80, 135.53 (d,  $J$  = 7.6 Hz), 133.9, 131.7, 128.7, 127.9 (d,  $J$  = 8.2 Hz), 126.8, 125.4 (d,  $J$  = 3.3 Hz), 125.0, 123.1, 114.8 (d,  $J$  = 22.0 Hz), 112.3 (d,  $J$  = 22.9 Hz), 108.9, 68.4 (d,  $J$  = 2.1 Hz); <sup>19</sup>F NMR (471 MHz, Methanol-*d*<sub>4</sub>)  $\delta$  -115.1 (q,  $J$  = 8.1 Hz); LRMS (ESI):  $m/z$  252.1 [M + H]<sup>+</sup>; HRMS (ESI): calcd for C<sub>16</sub>H<sub>10</sub>FNO<sup>+</sup> [M + H]<sup>+</sup>, 252.0819; found, 252.0814.

**3-chloro-5H-isochromeno[3,4-c]isoquinoline(3ae).**

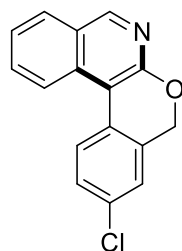

It was obtained as a white solid (72% yield); mp 170.2-171.6 °C; <sup>1</sup>H NMR (500 MHz, Chloroform-*d*)  $\delta$  8.95 (s, 1H), 8.43 (d,  $J$  = 8.6 Hz, 1H), 8.00 (d,  $J$  = 8.2 Hz, 1H), 7.97 (d,  $J$  = 2.0 Hz, 1H), 7.78 (ddd,  $J$  = 8.4, 6.8, 1.3 Hz, 1H), 7.52 (ddd,  $J$  = 8.0, 6.9, 1.0 Hz, 1H), 7.35 (dd,  $J$  = 8.0, 2.0 Hz, 1H), 7.27 (d,  $J$  = 8.4 Hz, 1H), 5.19 (s, 2H); <sup>13</sup>C NMR (126 MHz, Chloroform-*d*)  $\delta$  152.6, 134.4, 134.2, 132.0, 131.7, 131.2, 129.1, 127.8,

126.9, 126.7, 126.3, 125.2, 123.4, 69.1; LRMS (ESI):  $m/z$  264.1  $[M + H]^+$ ; HRMS (ESI): calcd for  $C_{17}H_{11}NO_3^+$   $[M + H]^+$ , 252.0819; found, 252.0817. LRMS (ESI):  $m/z$  268.1  $[M + H]^+$ ; HRMS (ESI): calcd for  $C_{16}H_{10}ClNO_3^+$   $[M + H]^+$ , 268.0524; found, 268.0531.

**3-(trifluoromethyl)-5H-isochromeno[3,4-c]isoquinoline(3af).**

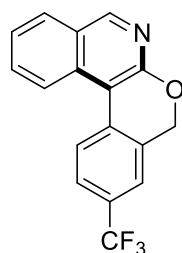

It was obtained as a yellow solid (78% yield); mp 142.2-144.6 °C;  $^1H$  NMR (500 MHz, Chloroform-*d*)  $\delta$  8.97 (s, 1H), 8.41 (d,  $J = 8.6$  Hz, 1H), 8.08 (d,  $J = 8.2$  Hz, 1H), 8.03 – 7.98 (m, 1H), 7.76 (ddd,  $J = 8.4, 6.9, 1.3$  Hz, 1H), 7.69 (dd,  $J = 8.3, 1.8$  Hz, 1H), 7.59 – 7.57 (m, 1H), 7.52 (ddd,  $J = 8.1, 6.9, 1.0$  Hz, 1H), 5.25 (s, 2H);  $^{13}C$  NMR (126 MHz, Chloroform-*d*)  $\delta$  159.6, 153.1, 134.2, 133.41 133.3, 131.9, 129.6 (q,  $J = 32.9$  Hz), 129.0, 127.2 – 120.7 (q,  $J = 272.8$  Hz), 126.9, 126.4, 125.4 – 125.2 (m), 125.2, 123.2, 122.3 (q,  $J = 3.8$  Hz), 108.3, 69.0;  $^{19}F$  NMR (471 MHz, Chloroform-*d*)  $\delta$  -62.5; LRMS (ESI):  $m/z$  282.8  $[M + H]^+$ ; HRMS (ESI): calcd for  $C_{17}H_{10}F_3NO^+$   $[M + H]^+$ , 302.0787; found, 302.0791.

**2-methoxy-5H-isochromeno[3,4-c]isoquinoline(3ag).**

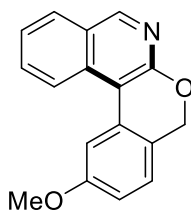

It was obtained as a yellow oil (79% yield);  $^1H$  NMR (500 MHz, Chloroform-*d*)  $\delta$  8.92 (s, 1H), 8.49 (d,  $J = 8.6$  Hz, 1H), 7.98 – 7.95 (d, 1H), 7.71 (ddd,  $J = 8.5, 6.8, 1.3$  Hz, 1H), 7.53 (d,  $J = 2.5$  Hz, 1H), 7.48 (ddd,  $J = 7.9, 6.8, 1.0$  Hz, 1H), 7.24 (d,  $J = 8.2$  Hz, 1H), 6.90 (dd,  $J = 8.3, 2.5$  Hz, 1H), 5.16 (s, 2H), 3.87 (s, 3H);  $^{13}C$  NMR (126 MHz, Chloroform-*d*)  $\delta$  159.8, 159.4, 151.9, 134.4, 131.4, 131.1, 128.9, 126.9, 126.4, 125.5,

124.9, 123.7, 113.0, 112.5, 109.4, 69.3, 55.7; LRMS (ESI):  $m/z$  264.1  $[M + H]^+$ ; HRMS (ESI): calcd for  $C_{17}H_{13}NO_2^+$   $[M + H]^+$ , 264.1019; found, 264.1018.

**2-fluoro-5H-isochromeno[3,4-c]isoquinoline(3ah).**

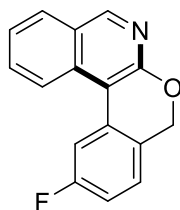

It was obtained as a yellow solid (88% yield); mp 167.2-168.8 °C;  $^1H$  NMR (500 MHz, Chloroform-*d*)  $\delta$  8.98 (d,  $J = 2.1$  Hz, 1H), 7.80 (dd,  $J = 7.8, 1.5$  Hz, 1H), 7.52 (ddd,  $J = 11.3, 7.8, 1.2$  Hz, 1H), 7.48 – 7.39 (m, 3H), 7.36 (td,  $J = 7.4, 1.2$  Hz, 1H), 7.29 (dd,  $J = 7.5, 1.5$  Hz, 1H), 5.25 (s, 2H);  $^{13}C$  NMR (126 MHz, Chloroform-*d*)  $\delta$  158.8 (d,  $J = 234.6$  Hz), 155.9, 151.6, 130.8, 129.5, 128.3 (d,  $J = 4.8$  Hz), 127.9 (d,  $J = 14.5$  Hz), 127.5 (d,  $J = 2.2$  Hz), 127.3, 124.6 (d,  $J = 7.9$  Hz), 124.3 (d,  $J = 3.9$  Hz), 124.0, 123.4 (d,  $J = 14.6$  Hz), 115.9 (d,  $J = 22.0$  Hz), 106.3, 69.4;  $^{19}F$  NMR (471 MHz, Chloroform-*d*)  $\delta$  -62.5; LRMS (ESI):  $m/z$  264.1  $[M + H]^+$ ; HRMS (ESI): calcd for  $C_{13}H_{10}FNO^+$   $[M + H]^+$ , 252.0819; found, 252.0817.

**8H-[1,3]dioxolo[4',5':6,7]isochromeno[3,4-c]isoquinoline(3ai).**

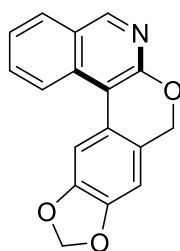

It was obtained as a yellow solid (78% yield); mp 166.6-168.5 °C;  $^1H$  NMR (600 MHz, Chloroform-*d*)  $\delta$  8.88 (s, 1H), 8.39 (d,  $J = 8.6$  Hz, 1H), 7.96 (d,  $J = 8.1$  Hz, 1H), 7.71 (ddd,  $J = 8.4, 6.8, 1.3$  Hz, 1H), 7.50 – 7.44 (m, 2H), 6.81 (s, 1H), 6.04 (s, 2H), 5.11 (s, 2H);  $^{13}C$  NMR (151 MHz, Chloroform-*d*)  $\delta$  158.6, 150.9, 148.0, 147.4, 134.0, 131.2, 128.9, 127.2, 127.0, 124.9, 123.9, 123.6, 109.8, 107.1, 106.4, 101.6, 69.5; LRMS (ESI):

m/z 264.1 [M + H]<sup>+</sup>; HRMS (ESI): calcd for C<sub>17</sub>H<sub>11</sub>NO<sub>3</sub><sup>+</sup> [M + H]<sup>+</sup>, 252.0819; found, 252.0817. LRMS (ESI): m/z 278.2 [M + H]<sup>+</sup>; HRMS (ESI): calcd for C<sub>17</sub>H<sub>11</sub>NO<sub>3</sub><sup>+</sup> [M + H]<sup>+</sup>, 278.0810; found, 278.0812.

**11-bromo-3-methoxy-5H-isochromeno[3,4-c]isoquinoline(3aj).**

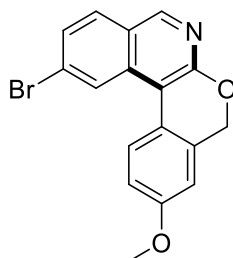

It was obtained as a white solid (93% yield); mp 166.8-168.2 °C; <sup>1</sup>H NMR (500 MHz, Chloroform-*d*) δ 8.83 (s, 1H), 8.59 (d, *J* = 1.7 Hz, 1H), 7.86 (d, *J* = 8.6 Hz, 1H), 7.82 (d, *J* = 8.7 Hz, 1H), 7.55 (dd, *J* = 8.7, 1.8 Hz, 1H), 7.03 (dd, *J* = 8.6, 2.7 Hz, 1H), 6.87 (d, *J* = 2.6 Hz, 1H), 5.19 (s, 2H), 3.89 (s, 3H); <sup>13</sup>C NMR (126 MHz, Chloroform-*d*) δ 159.7, 150.1, 134.9, 134.7, 130.2, 128.3, 127.5, 126.5, 126.2, 125.2, 121.8, 113.9, 111.3, 108.9, 69.6, 55.5; LRMS (ESI): m/z 342.1 [M + H]<sup>+</sup>; HRMS (ESI): calcd for C<sub>17</sub>H<sub>12</sub>BrNO<sub>2</sub><sup>+</sup> [M + H]<sup>+</sup>, 342.0124; found, 342.0127.

**11-bromo-3-fluoro-5H-isochromeno[3,4-c]isoquinoline(3ak).**

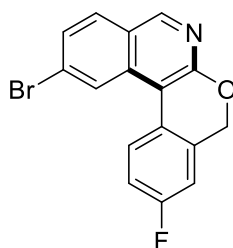

It was obtained as a white solid (77% yield); mp 197.5-200.5 °C; <sup>1</sup>H NMR (500 MHz, Chloroform-*d*) δ 8.88 (s, 1H), 8.55 (d, *J* = 1.7 Hz, 1H), 7.90 (dd, *J* = 8.6, 5.1 Hz, 1H), 7.84 (d, *J* = 8.7 Hz, 1H), 7.58 (dd, *J* = 8.7, 1.8 Hz, 1H), 7.20 (td, *J* = 8.5, 2.7 Hz, 1H), 7.06 (dd, *J* = 8.2, 2.7 Hz, 1H), 5.19 (s, 2H). <sup>13</sup>C NMR (126 MHz, Chloroform-*d*) δ 162.4 (d, *J* = 249.9 Hz), 159.3, 151.4, 135.2 (d, *J* = 7.3 Hz), 135.0, 130.3, 128.6, 127.8 (d, *J* = 8.1 Hz), 126.9, 125.9, 125.4 (d, *J* = 3.4 Hz), 125.2, 115.6 (d, *J* = 21.7 Hz), 112.9 (d, *J* = 22.6 Hz), 108.0, 69.0 (d, *J* = 2.1 Hz); <sup>19</sup>F NMR (471 MHz, Chloroform-*d*) δ -

112.5 (t,  $J = 7.0$  Hz); LRMS (ESI):  $m/z$  330.1  $[M + H]^+$ ; HRMS (ESI): calcd for  $C_{16}H_9BrFNO_2^+$   $[M + H]^+$ , 329.9924; found, 329.9931.

**3,11-dimethyl-5H-isochromeno[3,4-c]isoquinoline(3al).**

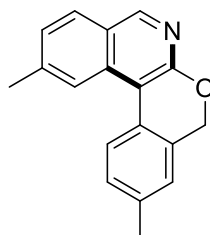

It was obtained as a white solid (81% yield); mp 107.5-108.8 °C;  $^1H$  NMR (600 MHz, Chloroform-*d*)  $\delta$  8.82 (s, 1H), 8.24 (s, 1H), 7.89 (d,  $J = 7.9$  Hz, 1H), 7.85 (d,  $J = 8.3$  Hz, 1H), 7.31 (dd,  $J = 8.3, 1.5$  Hz, 1H), 7.29 – 7.26 (m, 1H), 7.15 – 7.13 (m, 1H), 5.17 (s, 2H), 2.57 (d,  $J = 1.0$  Hz, 3H), 2.43 (s, 3H);  $^{13}C$  NMR (151 MHz, Chloroform-*d*)  $\delta$  159.0, 150.7, 141.6, 137.7, 134.5, 133.1, 129.0, 128.5, 127.2, 127.0, 126.2, 126.0, 125.3, 122.7, 109.0, 69.5, 22.6, 21.2; LRMS (ESI):  $m/z$  262.2  $[M + H]^+$ ; HRMS (ESI): calcd for  $C_{18}H_{15}NO^+$   $[M + H]^+$ , 262.1226; found, 262.1225.

**3,11-dimethoxy-5H-isochromeno[3,4-c]isoquinoline(3am).**

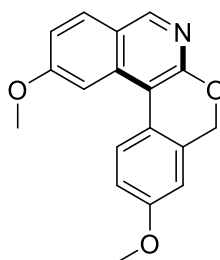

It was obtained as a yellow oil (85% yield);  $^1H$  NMR (500 MHz, Chloroform-*d*)  $\delta$  8.73 (s, 1H), 7.97 (d,  $J = 8.6$  Hz, 1H), 7.85 (d,  $J = 9.0$  Hz, 1H), 7.74 (d,  $J = 2.3$  Hz, 1H), 7.12 (dd,  $J = 9.0, 2.3$  Hz, 1H), 7.00 (dd,  $J = 8.6, 2.7$  Hz, 1H), 6.88 (d,  $J = 2.7$  Hz, 1H), 5.18 (s, 2H), 3.97 (s, 3H), 3.89 (s, 3H);  $^{13}C$  NMR (126 MHz, Chloroform-*d*)  $\delta$  162.0, 159.2, 158.7, 149.4, 136.0, 134.7, 130.5, 126.6, 122.7, 117., 113.7, 111.2, 108.8, 102.3, 69.5, 55.5; LRMS (ESI):  $m/z$  294.2  $[M + H]^+$ ; HRMS (ESI): calcd for  $C_{18}H_{15}NO_3^+$   $[M + H]^+$ , 294.1125; found, 294.1125.

**3-fluoro-11-phenyl-5H-isochromeno[3,4-c]isoquinoline(3an).**

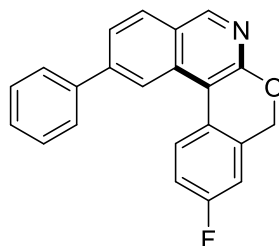

It was obtained as a white solid (63% yield); mp 182.9- 184.0 °C;  $^1\text{H}$  NMR (500 MHz, Chloroform-*d*)  $\delta$  8.93 (s, 1H), 8.56 (d,  $J = 1.5$  Hz, 1H), 8.04 (d,  $J = 8.5$  Hz, 1H), 8.00 (dd,  $J = 8.6, 5.2$  Hz, 1H), 7.74 (dd,  $J = 8.5, 1.6$  Hz, 1H), 7.72 – 7.69 (m, 2H), 7.55 – 7.50 (m, 2H), 7.47 – 7.43 (m, 1H), 7.17 (td,  $J = 8.6, 2.7$  Hz, 1H), 7.07 (dd,  $J = 8.2, 2.6$  Hz, 1H), 5.20 (s, 2H);  $^{13}\text{C}$  NMR (126 MHz, Chloroform-*d*)  $\delta$  162.2 (d,  $J = 249.5$  Hz), 159.0, 151.18, 144.2, 140.5, 135.3 (d,  $J = 7.3$  Hz), 134.4, 129.3, 129.1, 128.3, 127.9 (d,  $J = 8.2$  Hz), 127.6, 126.0 (d,  $J = 3.3$  Hz), 125.9, 124.9, 121.4, 115.4 (d,  $J = 21.5$  Hz), 112.8 (d,  $J = 22.5$  Hz), 109.0, 69.0;  $^{19}\text{F}$  NMR (471 MHz, Chloroform-*d*)  $\delta$  -113.1 (q,  $J = 8.0$  Hz); LRMS (ESI):  $m/z$  328.2  $[\text{M} + \text{H}]^+$ ; HRMS (ESI): calcd for  $\text{C}_{22}\text{H}_{14}\text{FNO}^+$   $[\text{M} + \text{H}]^+$ , 328.1132; found, 328.1134.

**Procedure for the Diversification of Clinical Drugs:** Product **4b** was prepared starting from substrate **4a**. Substrate **4a** (0.2 mmol, 1 equiv), 5,5-dimethylpyrazolidin-3-one (0.24mmol, 1.2 equiv), **2a** (0.24mmol, 1.2equiv),  $[\text{Cp}^*\text{RhCl}_2]_2$  (0.02 mmol, 0.1 equiv), and NaOAc (0.4 mmol, 2 equiv) were mixed in a Schlenk tube and to this mixture was added HFIP (2.0 mL). The resulting mixture was stirred at 40°C for 12 h. Upon completion of the reaction, the mixture was filtered through a pad of Celite and washed with EA (10 mL  $\times$  3). The combined organic layer was concentrated under reduced pressure and the crude residue was purified by silica gel chromatography (PE:EA=1:1) to give the desired product **4b**.

**1-(5H-isochromeno[3,4-c]isoquinolin-11-yl)-5-methylpyridin-2(1H)-one(4b).**

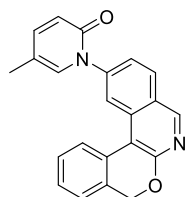

It was obtained as a white solid (33% yield); mp 111.2-113.2 °C; <sup>1</sup>H NMR (600 MHz, Chloroform-*d*) δ 8.97 (s, 1H), 8.46 (s, 1H), 8.08 (d, *J* = 8.7 Hz, 1H), 7.96 (d, *J* = 7.8 Hz, 1H), 7.51 (dd, *J* = 8.6, 1.8 Hz, 1H), 7.47 (t, *J* = 7.1 Hz, 1H), 7.38 (t, *J* = 7.7 Hz, 1H), 7.35 – 7.30 (m, 3H), 7.18 (s, 1H), 6.68 (d, *J* = 9.4 Hz, 1H), 5.24 (s, 2H), 2.13 (s, 3H); <sup>13</sup>C NMR (151 MHz, Chloroform-*d*) δ 161.8, 159.8, 151.5, 143.6, 143.2, 134.7, 134.7, 133.0, 130.2, 129.4, 128.9, 128.3, 126.5, 126.0, 125.6, 123.9, 121.8, 121.5, 115.8, 69.7, 17.3; LRMS (ESI): *m/z* 341.2 [M + H]<sup>+</sup>; HRMS (ESI): calcd for C<sub>22</sub>H<sub>17</sub>N<sub>2</sub>O<sub>2</sub><sup>+</sup> [M + H]<sup>+</sup>, 341.1285; found, 341.1280.

**4-(5-(5H-isochromeno[3,4-c]isoquinolin-10-yl)-3-(trifluoromethyl)-1H-pyrazol-1-yl)benzenesulfonamide(5b)**

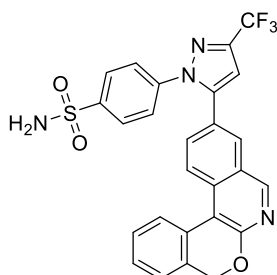

It was obtained as a yellow solid (46% yield); mp 263.0-265.8 °C; <sup>1</sup>H NMR (500 MHz, DMSO-*d*<sub>6</sub>) δ 9.05 (d, *J* = 0.7 Hz, 1H), 8.26 (d, *J* = 1.4 Hz, 1H), 8.20 (d, *J* = 8.5 Hz, 1H), 7.97 – 7.93 (m, 2H), 7.73 – 7.67 (m, 2H), 7.55 – 7.48 (m, 4H), 7.43 (dd, *J* = 7.5, 1.4 Hz, 1H), 7.39 (td, *J* = 7.4, 1.1 Hz, 1H), 7.32 (td, *J* = 7.6, 1.5 Hz, 1H), 7.17 (d, *J* = 7.7 Hz, 1H), 5.18 (s, 2H); <sup>13</sup>C NMR (126 MHz, DMSO-*d*<sub>6</sub>) δ 159.44, 151.76, 144.71, 144.36, 141.05, 132.89, 132.77, 131.04, 129.69, 128.75, 128.49, 128.13, 127.12, 126.33, 125.81, 125.64, 125.61, 125.17, 124.34, 108.90, 107.60, 68.62; <sup>19</sup>F NMR (471 MHz, DMSO-*d*<sub>6</sub>) δ -60.79; LRMS (ESI): *m/z* 523.1 [M + H]<sup>+</sup>; HRMS (ESI): calcd for C<sub>26</sub>H<sub>17</sub>F<sub>3</sub>N<sub>4</sub>O<sub>3</sub>S<sup>+</sup> [M + H]<sup>+</sup>, 523.1046; found, 523.1051.



## V. Charts of compounds

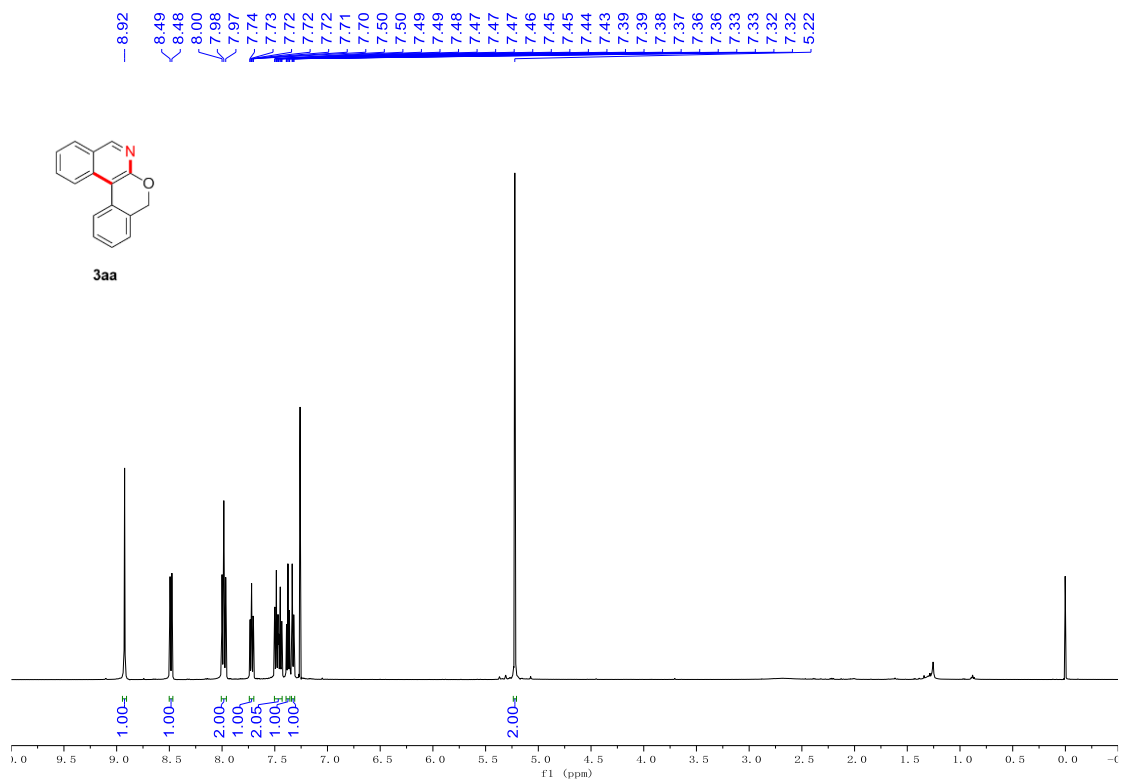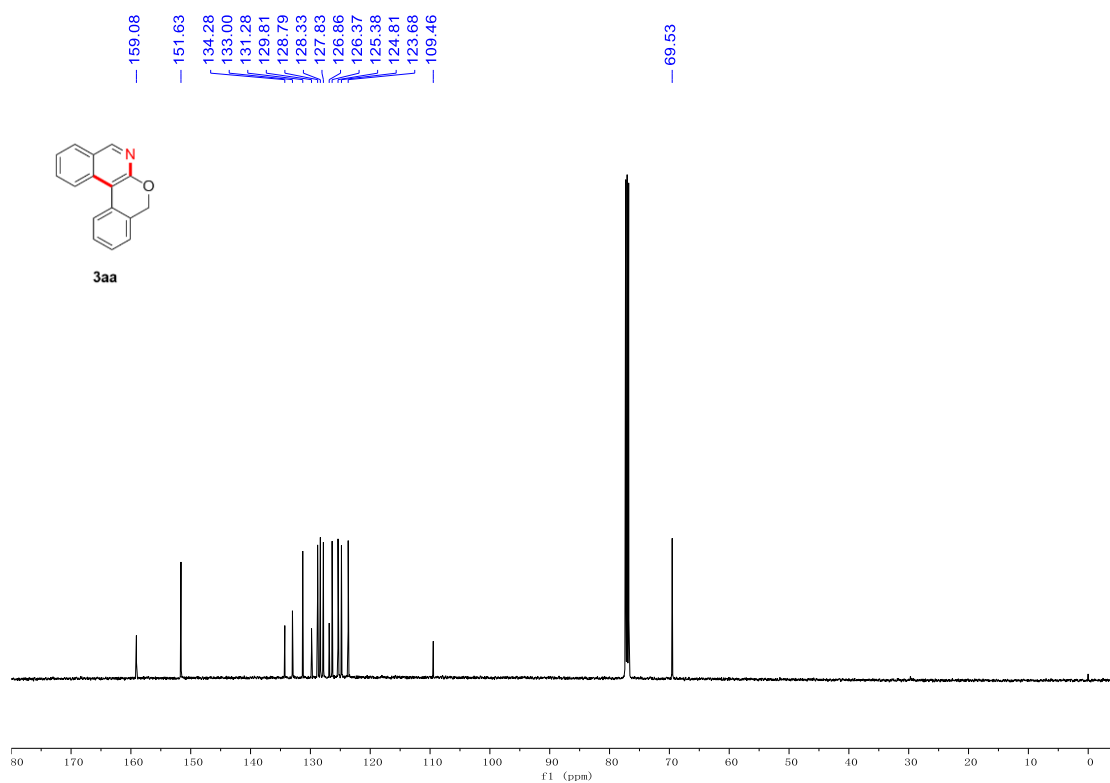

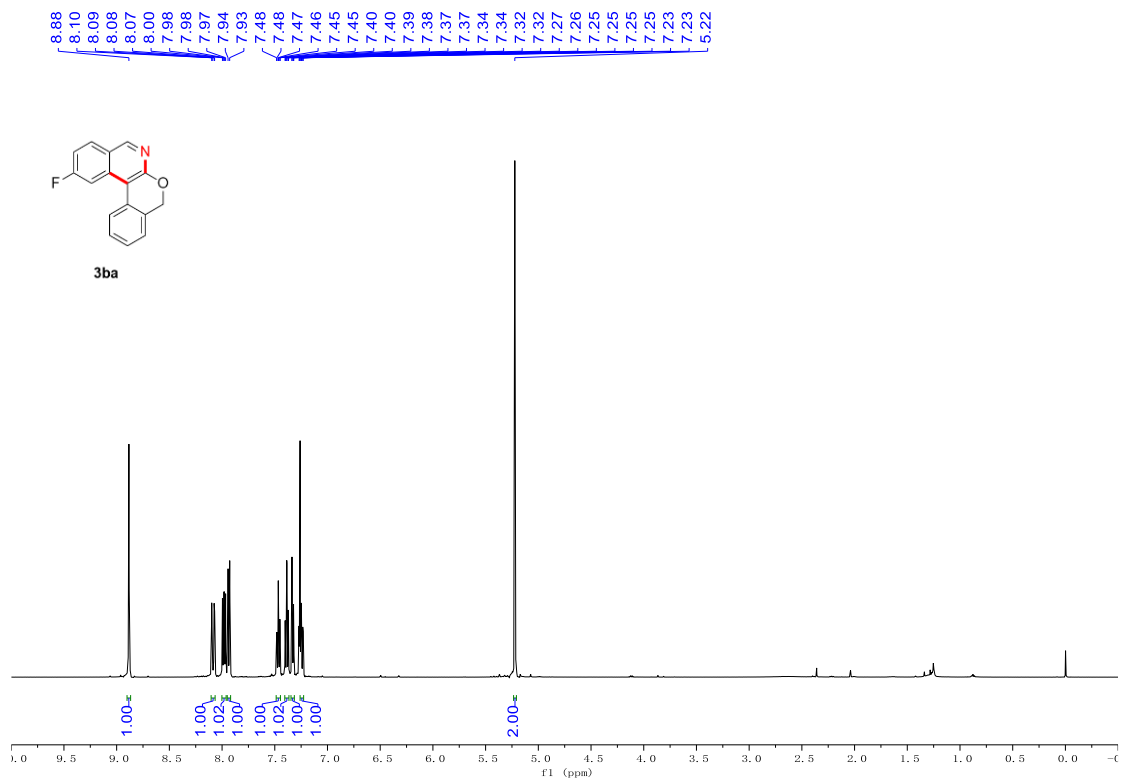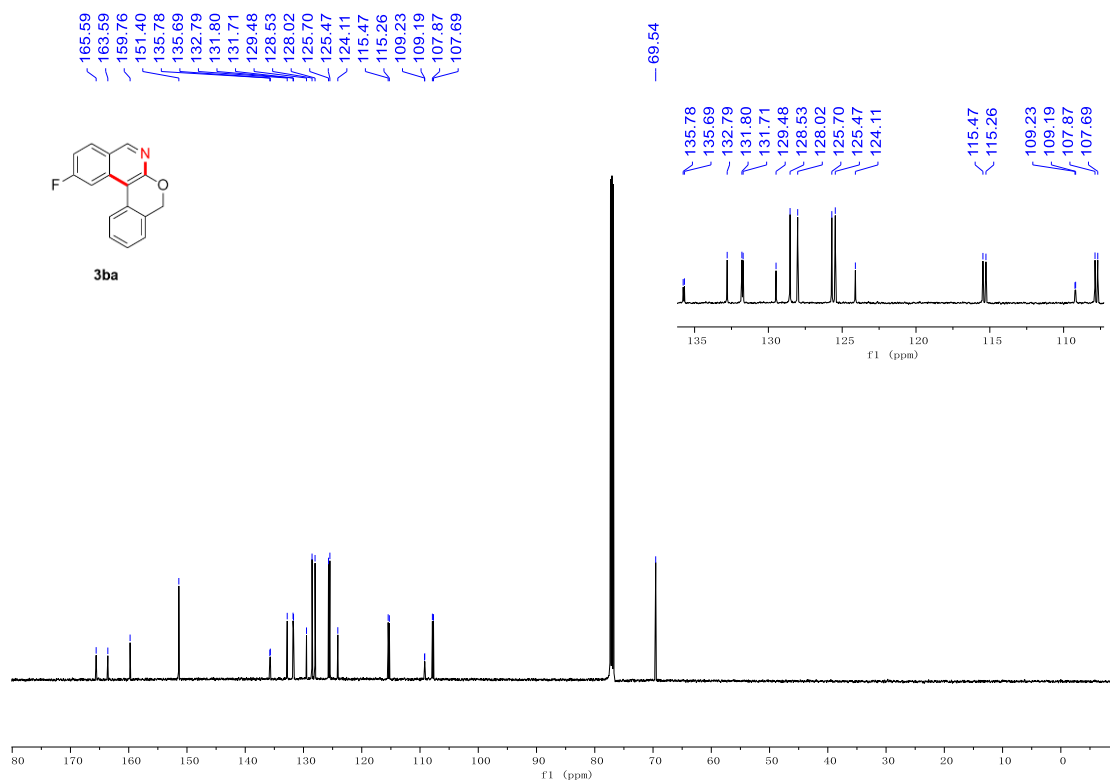

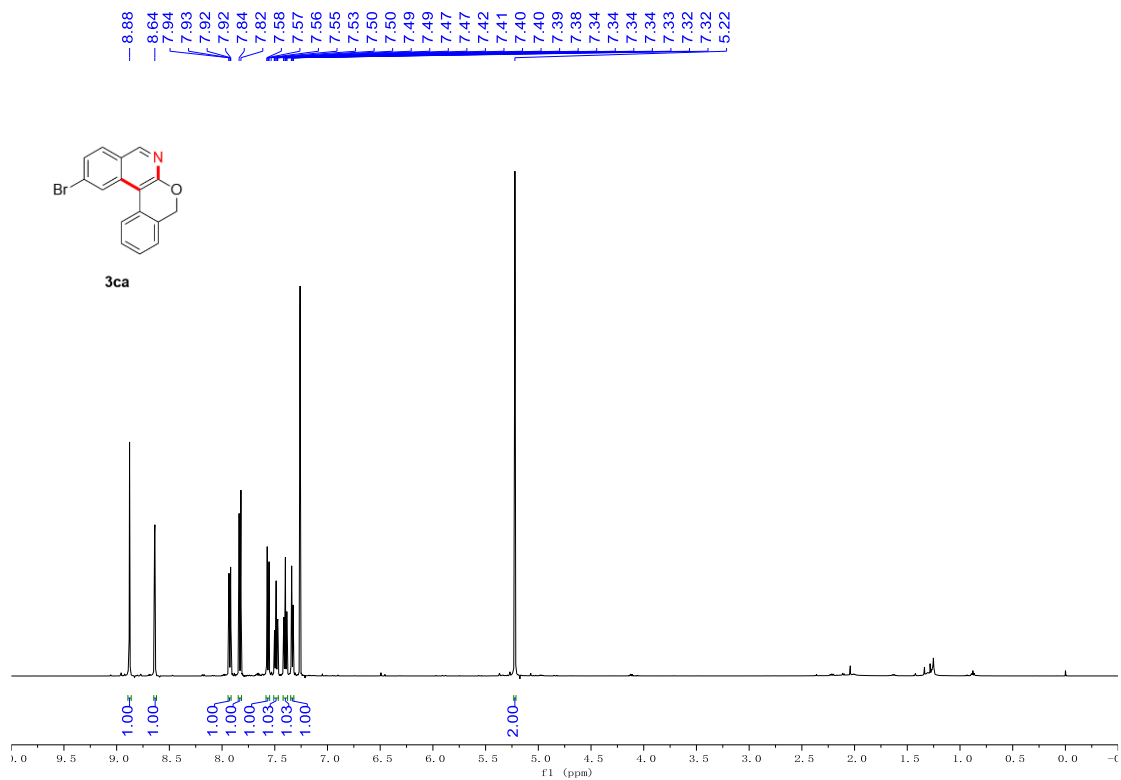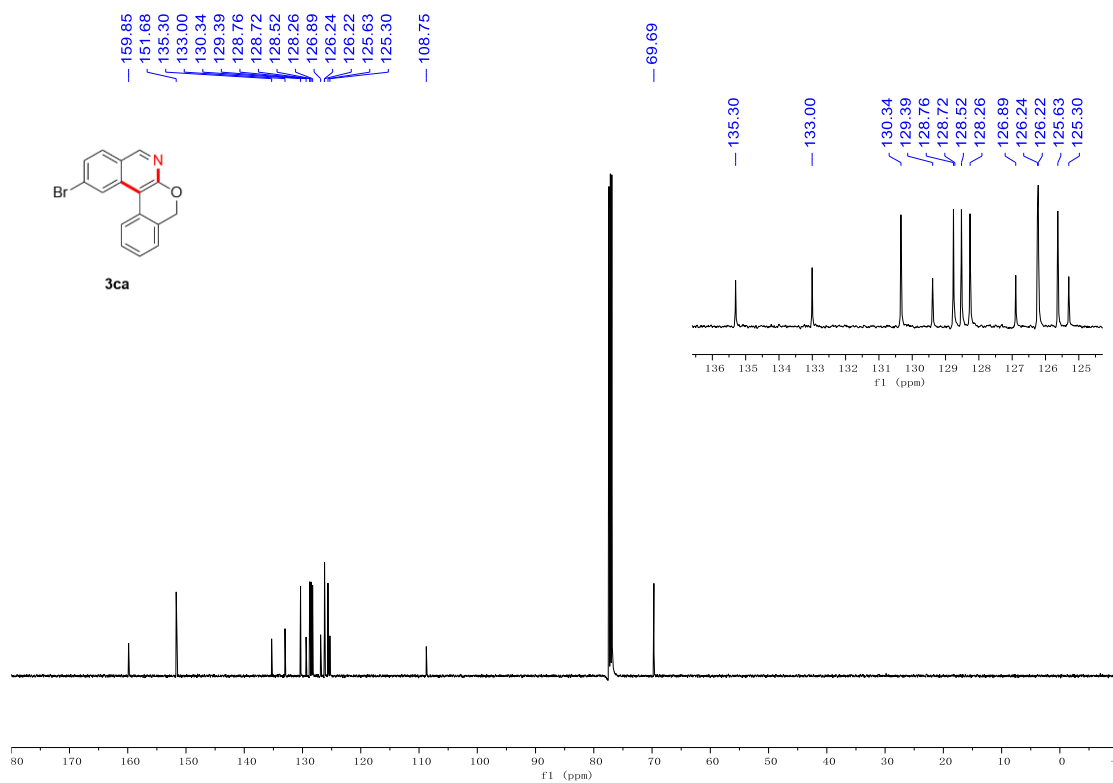

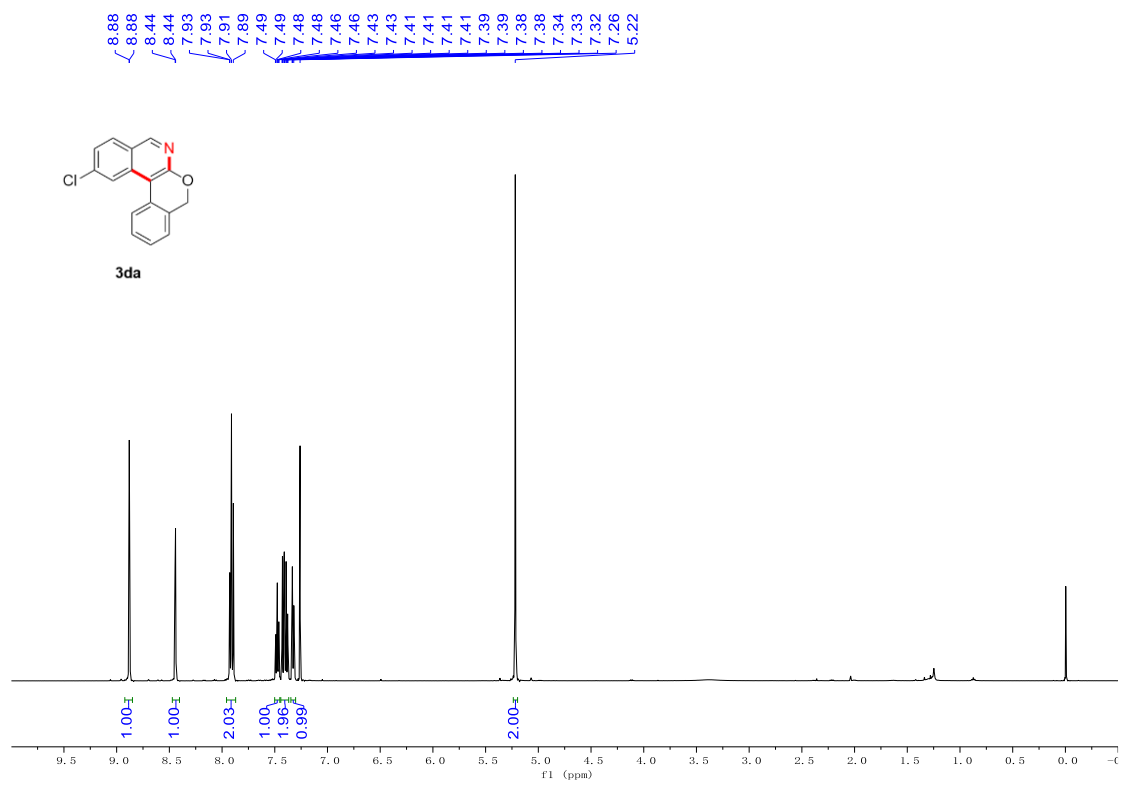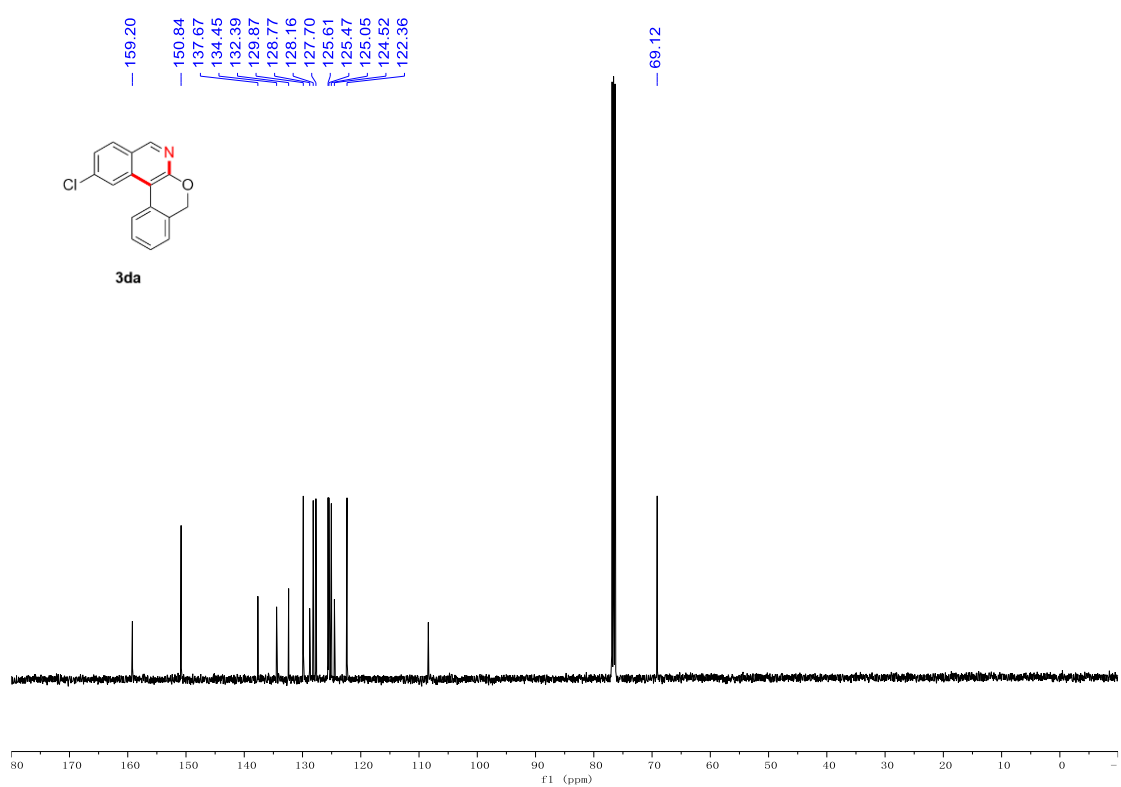

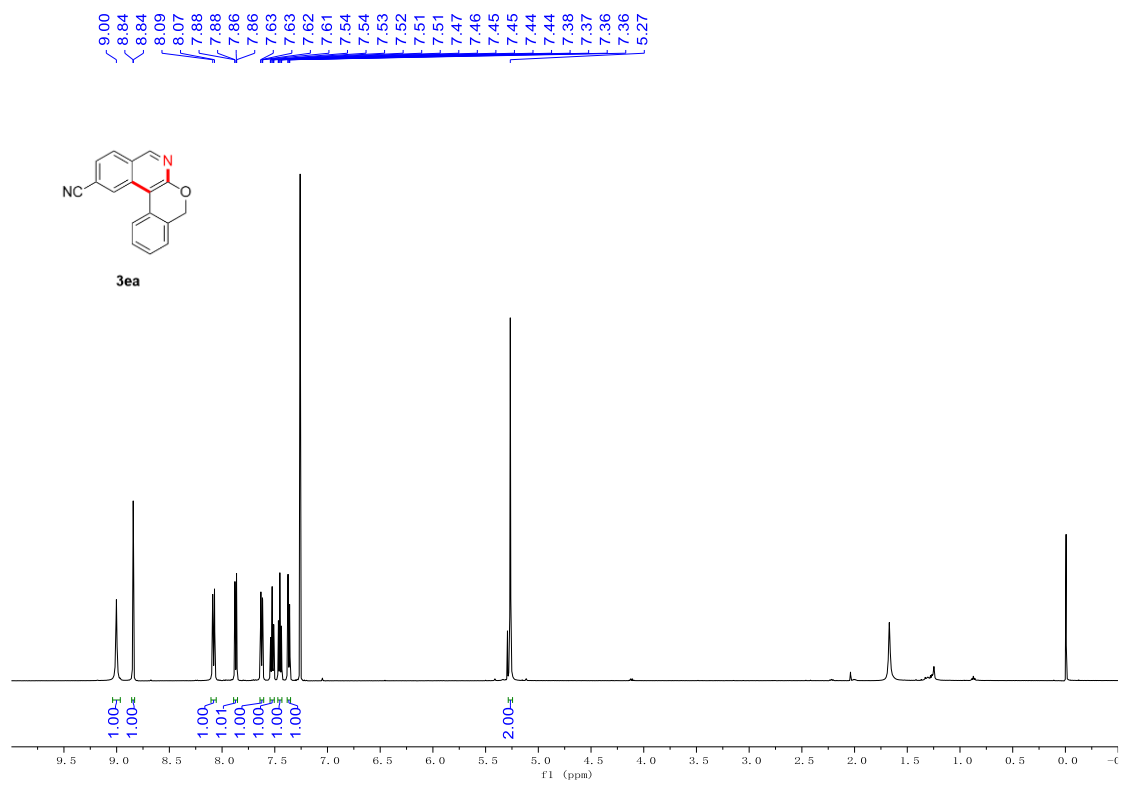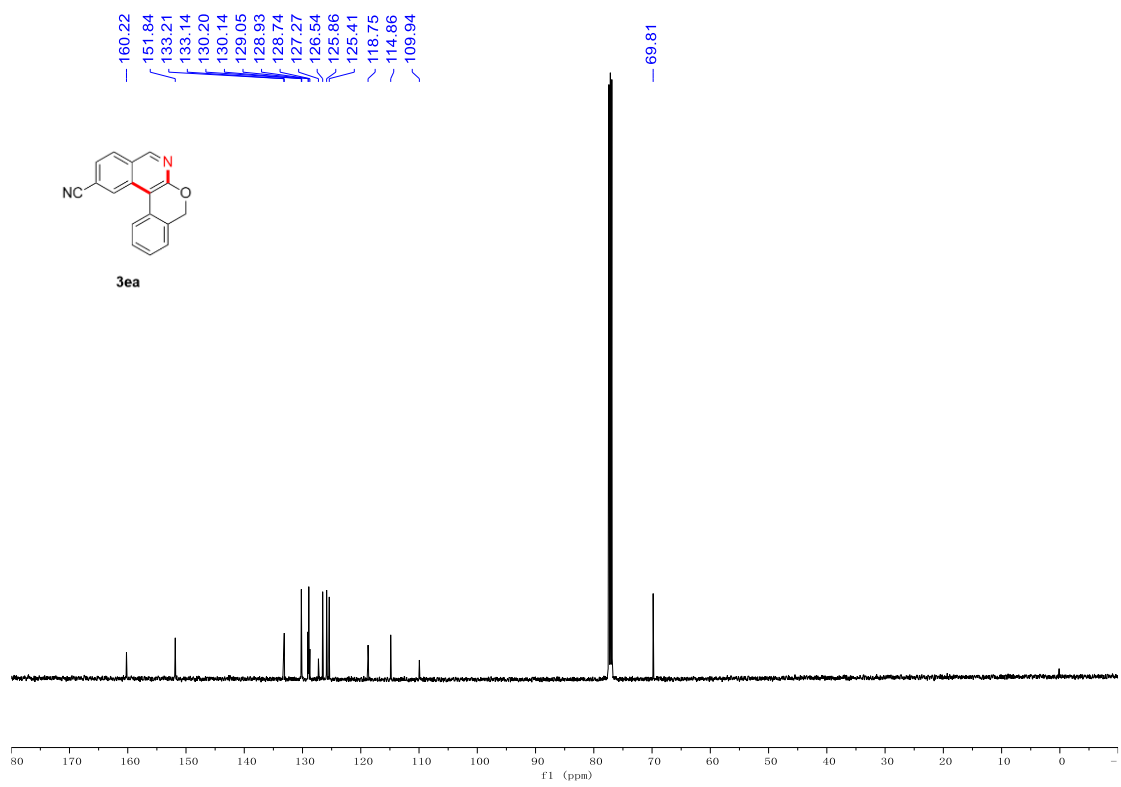

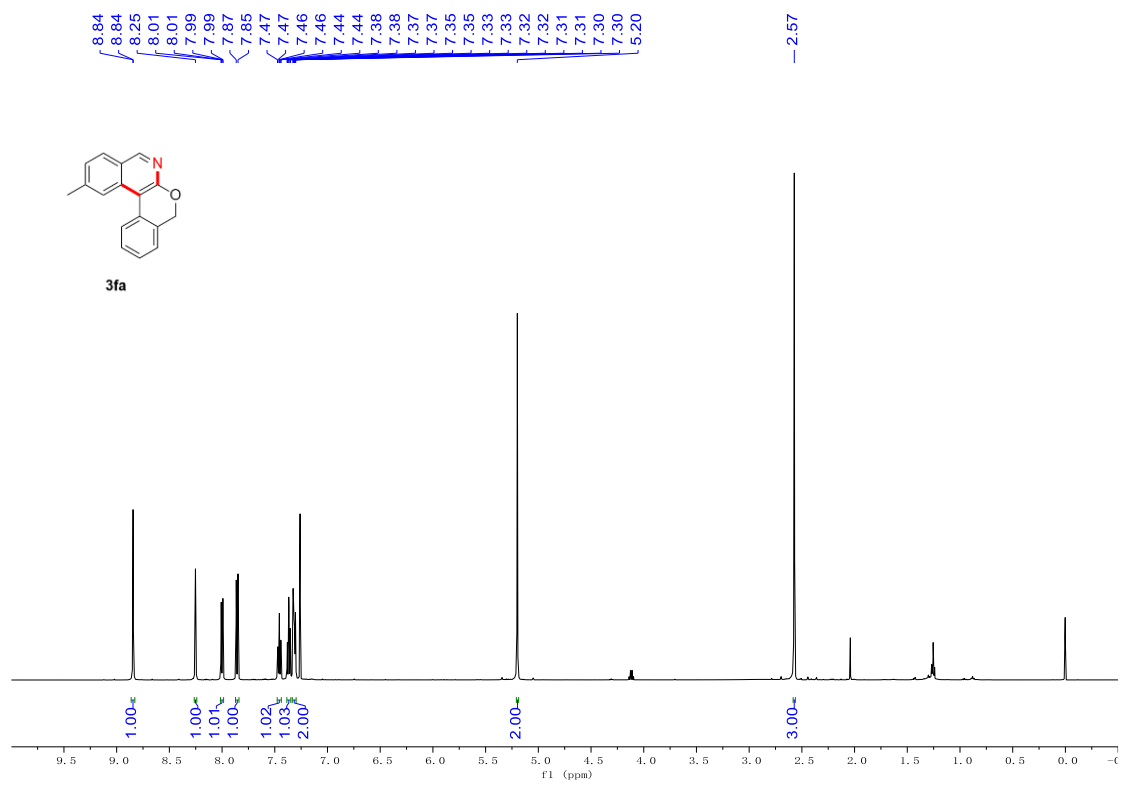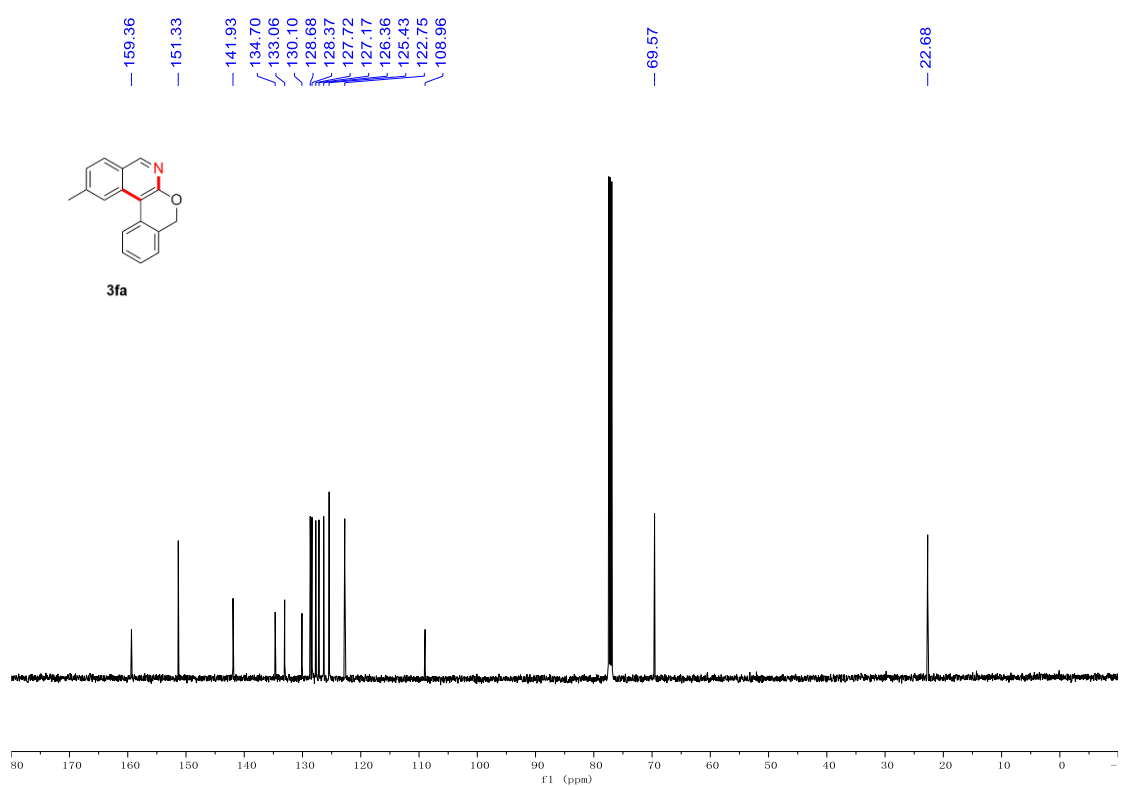

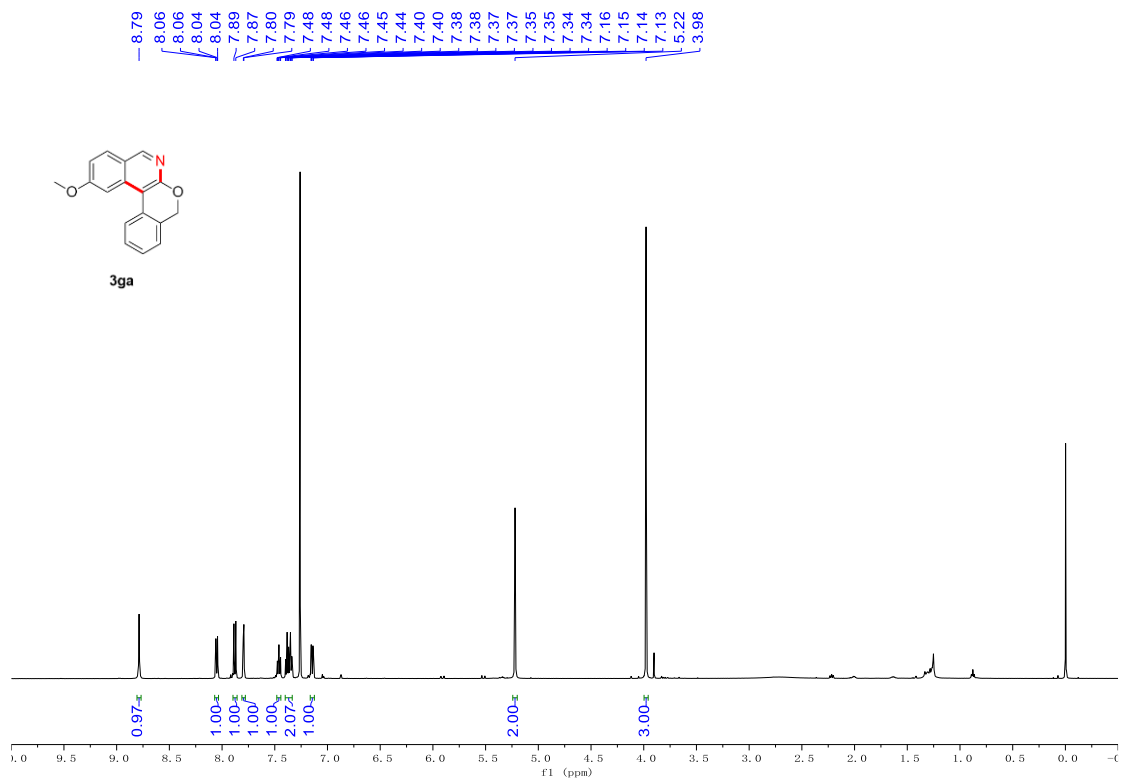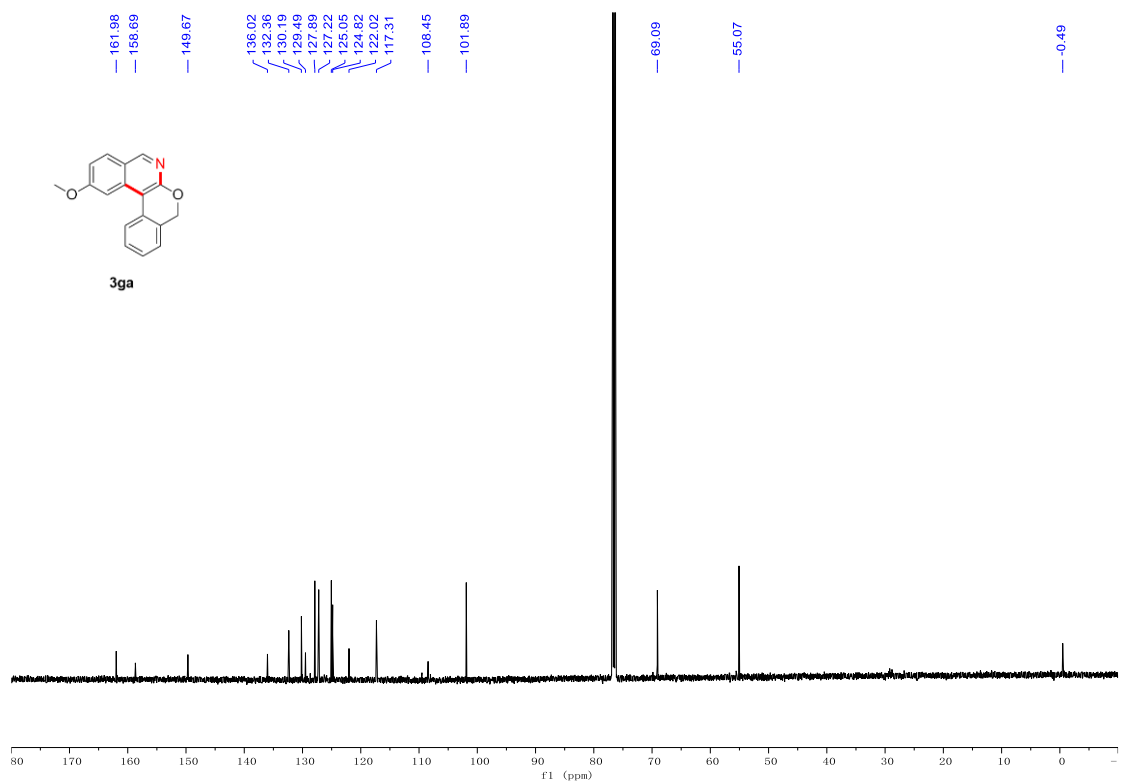

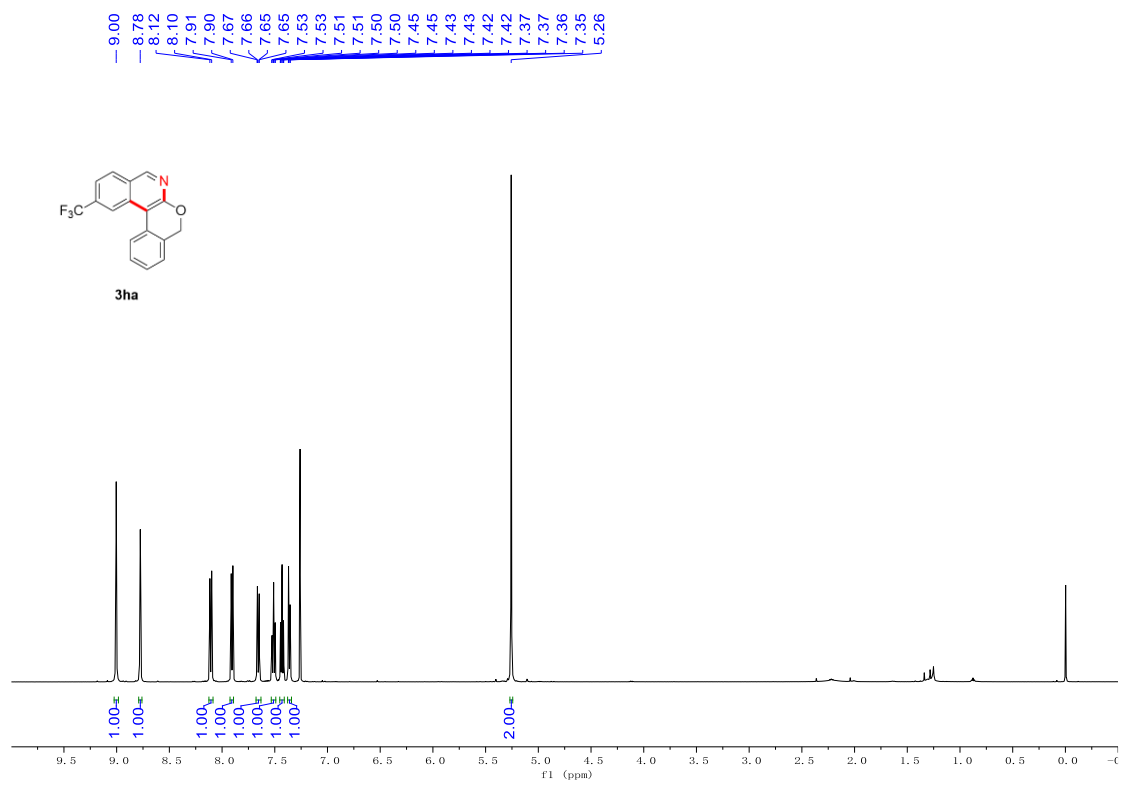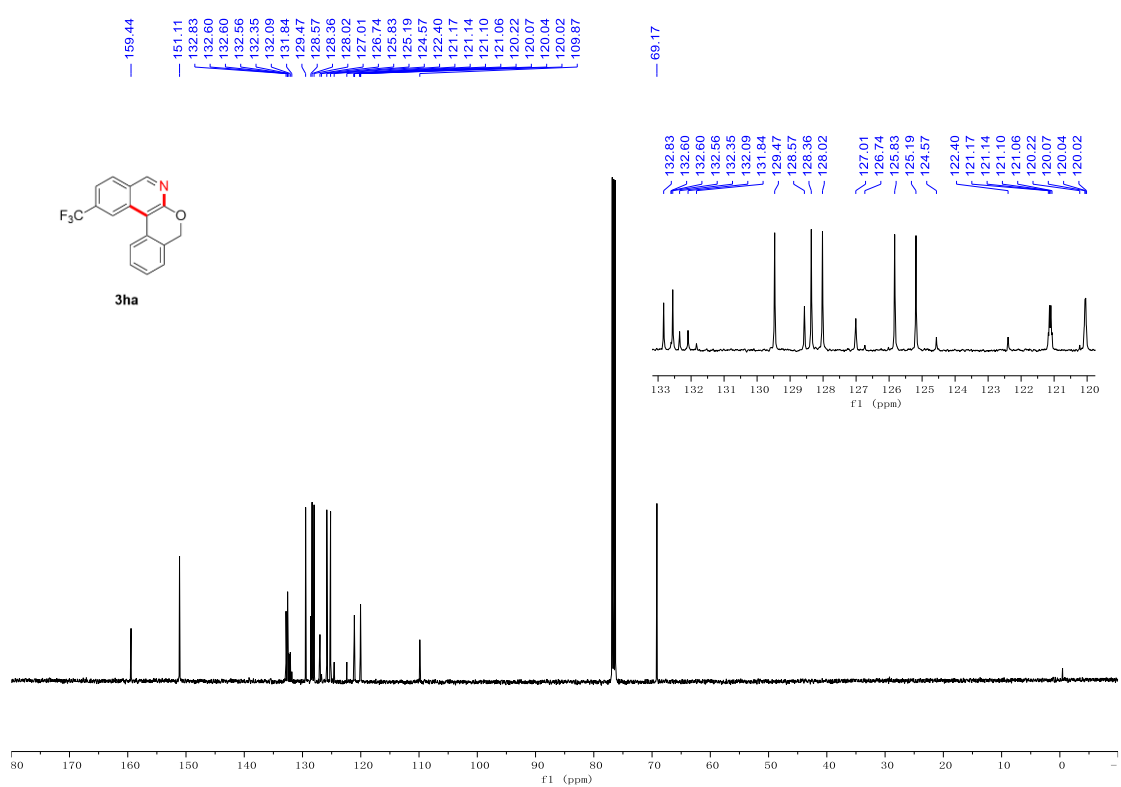



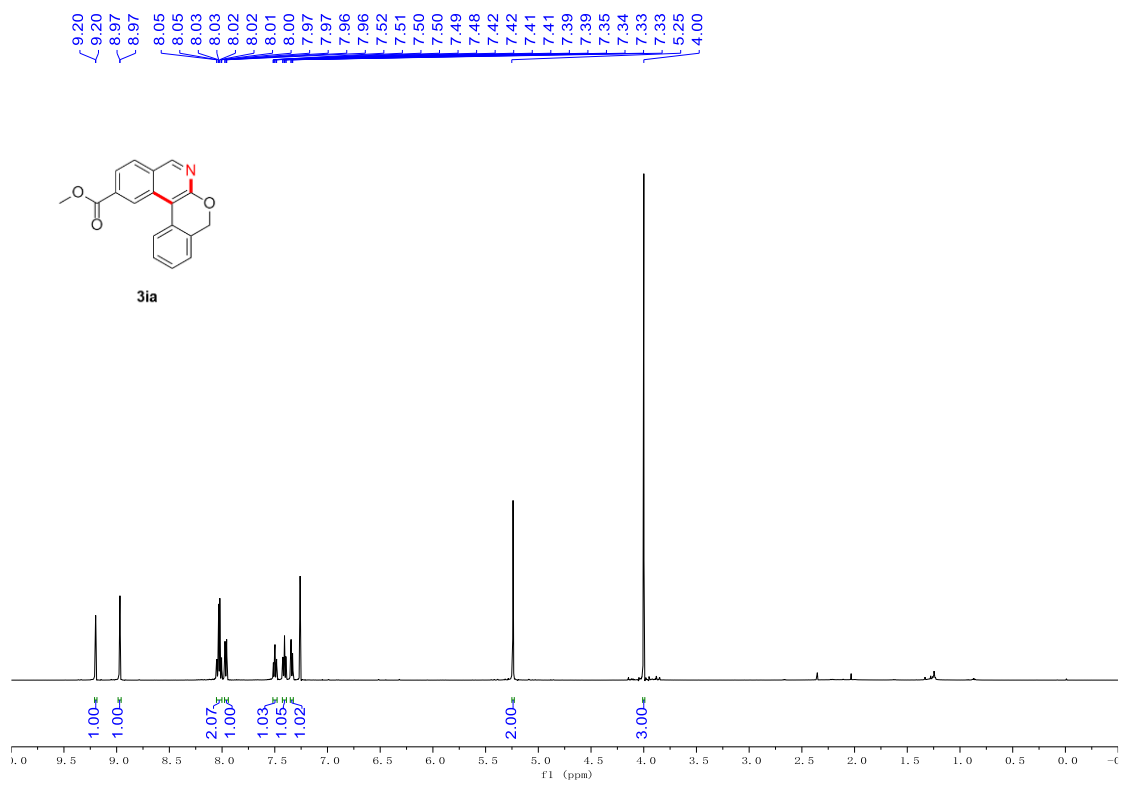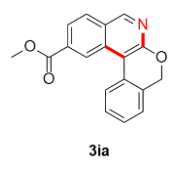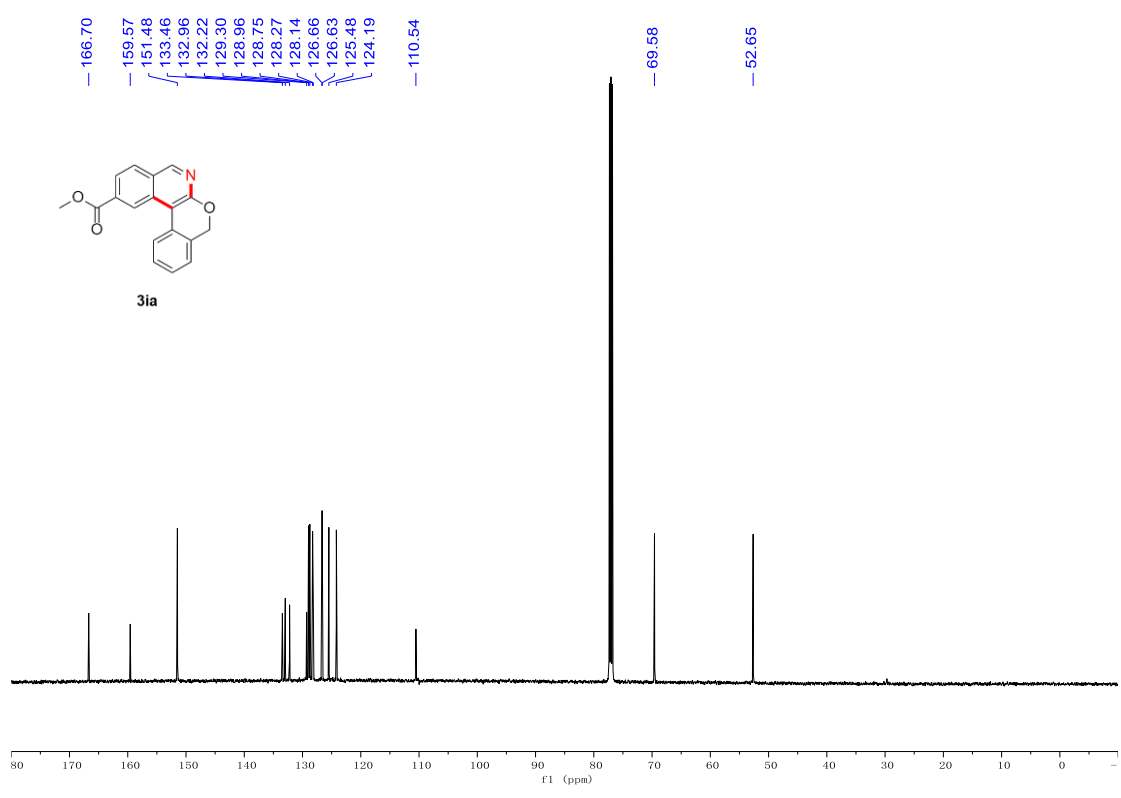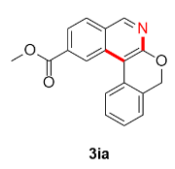

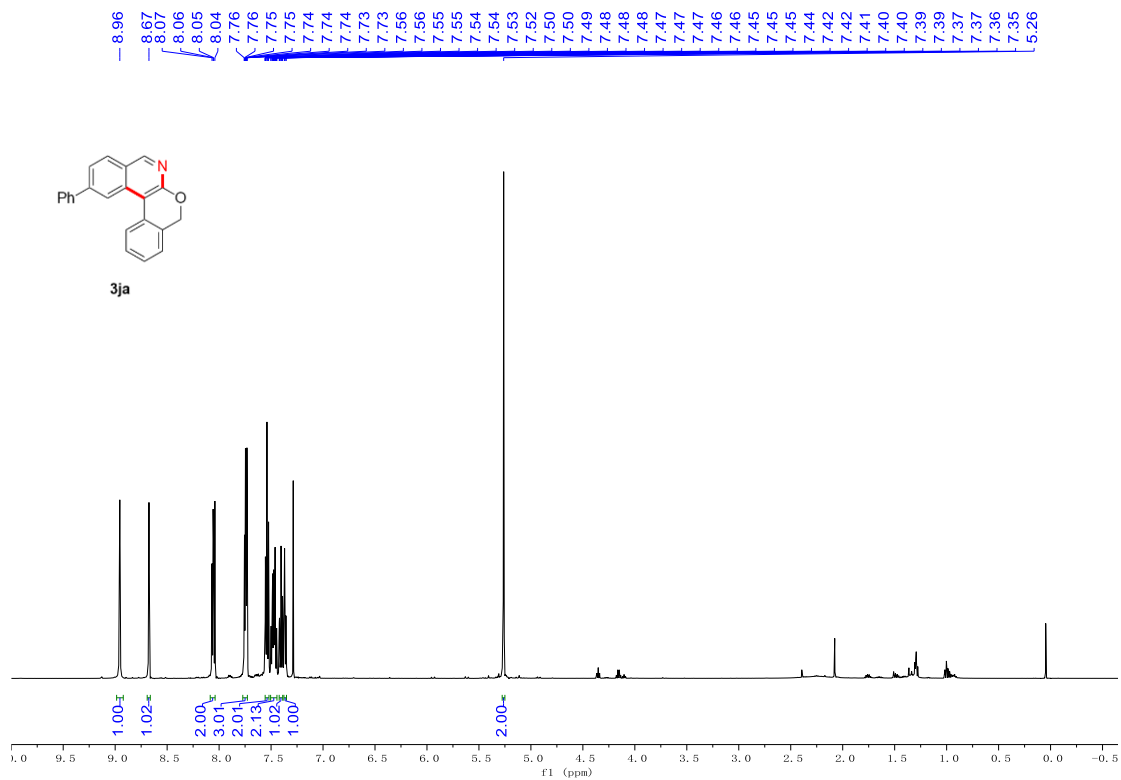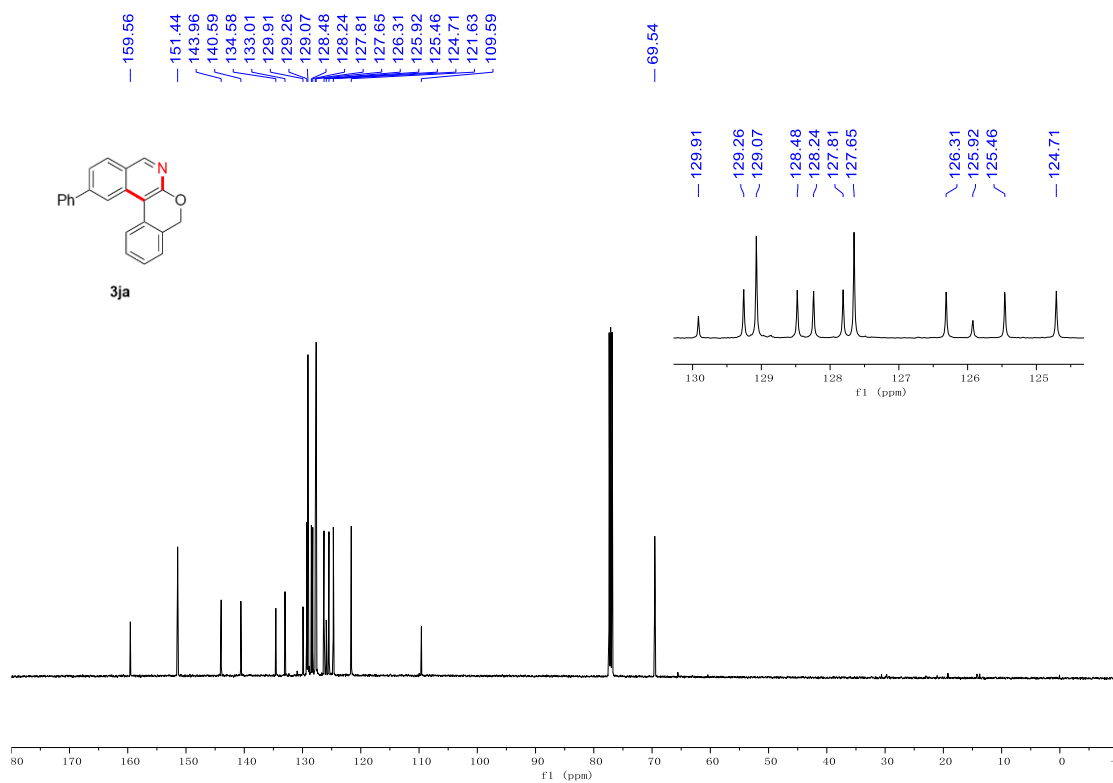

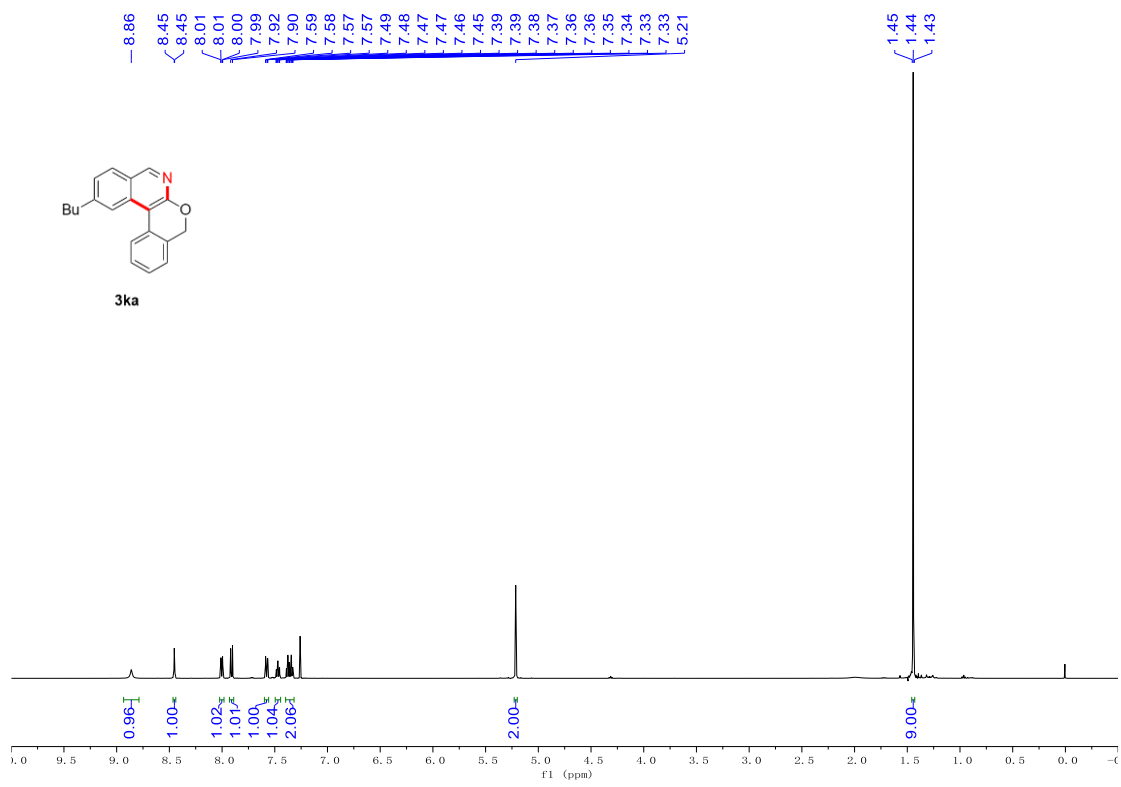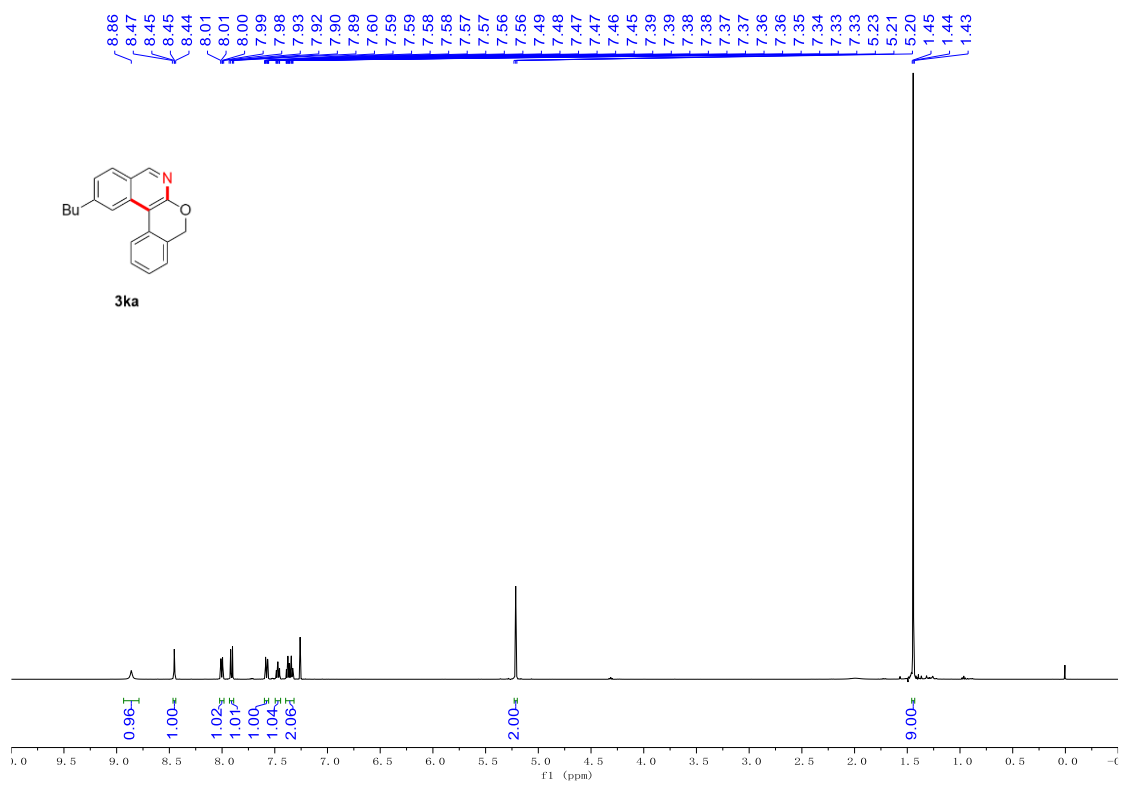

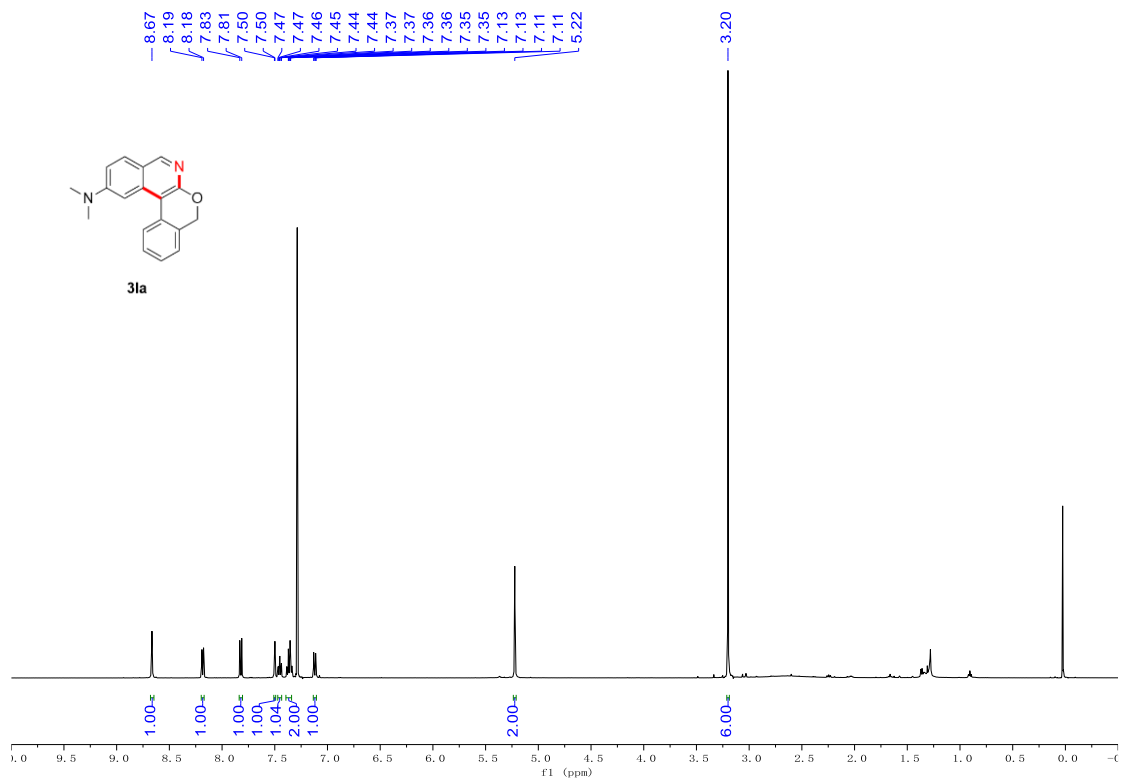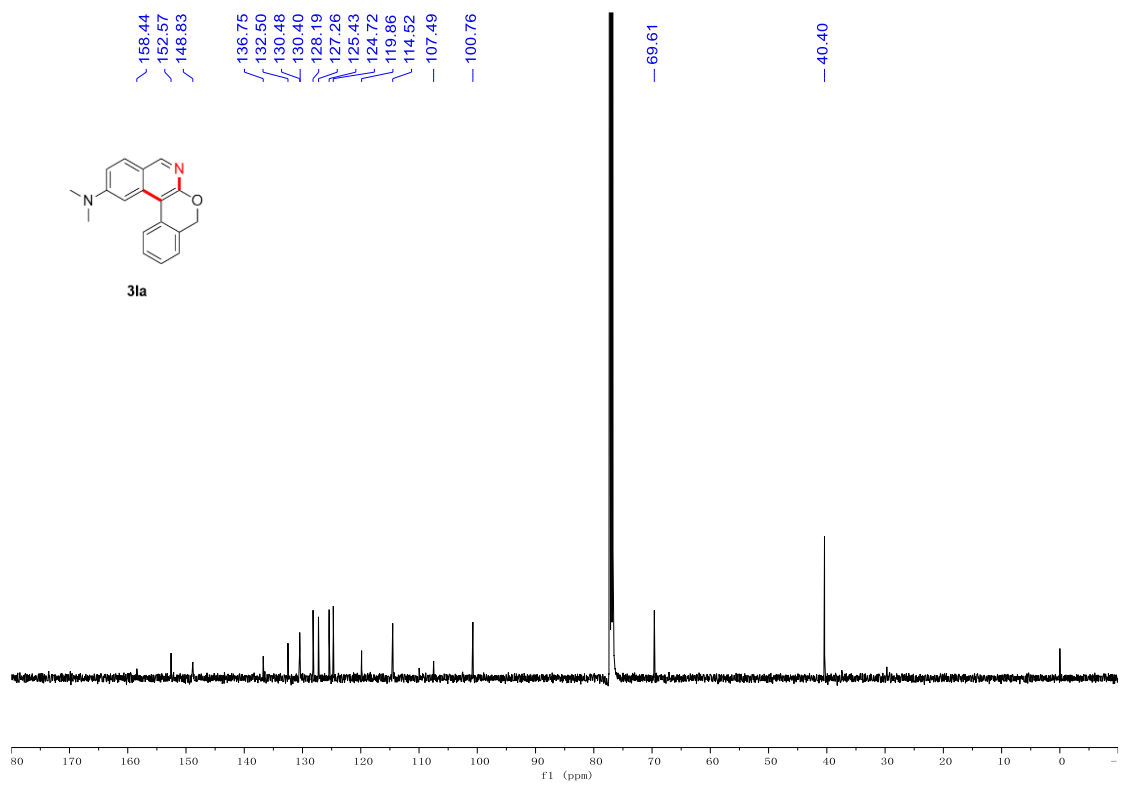

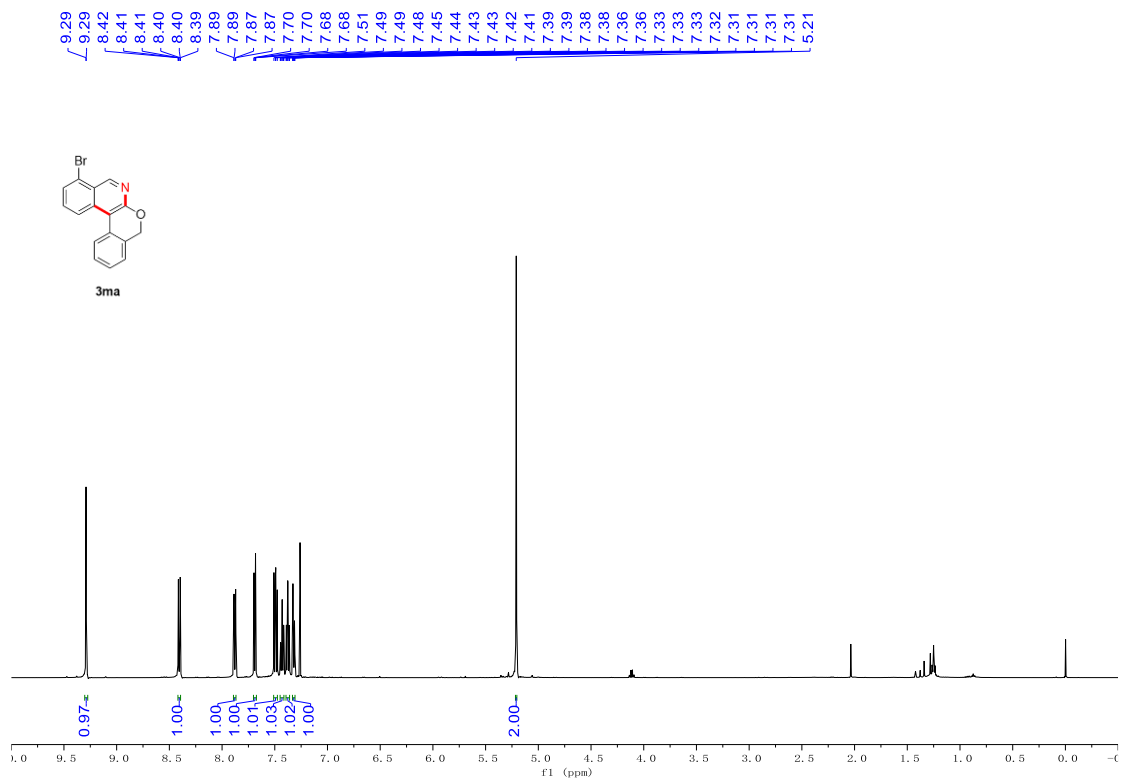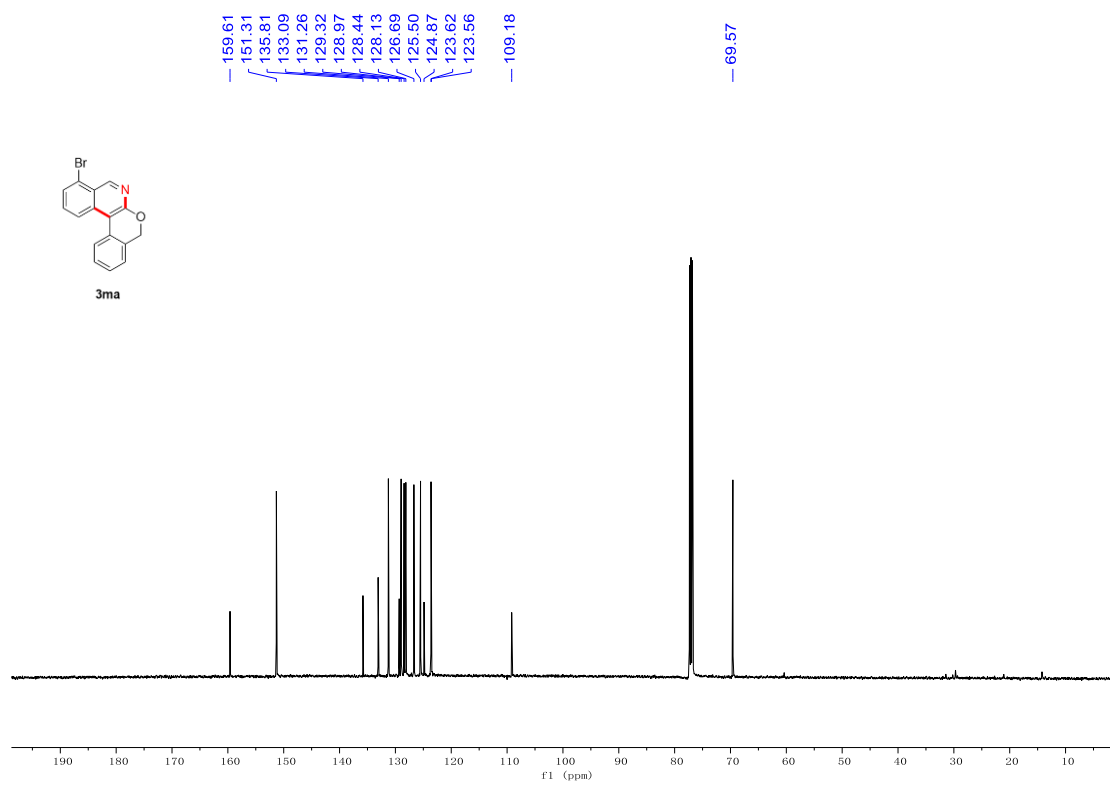

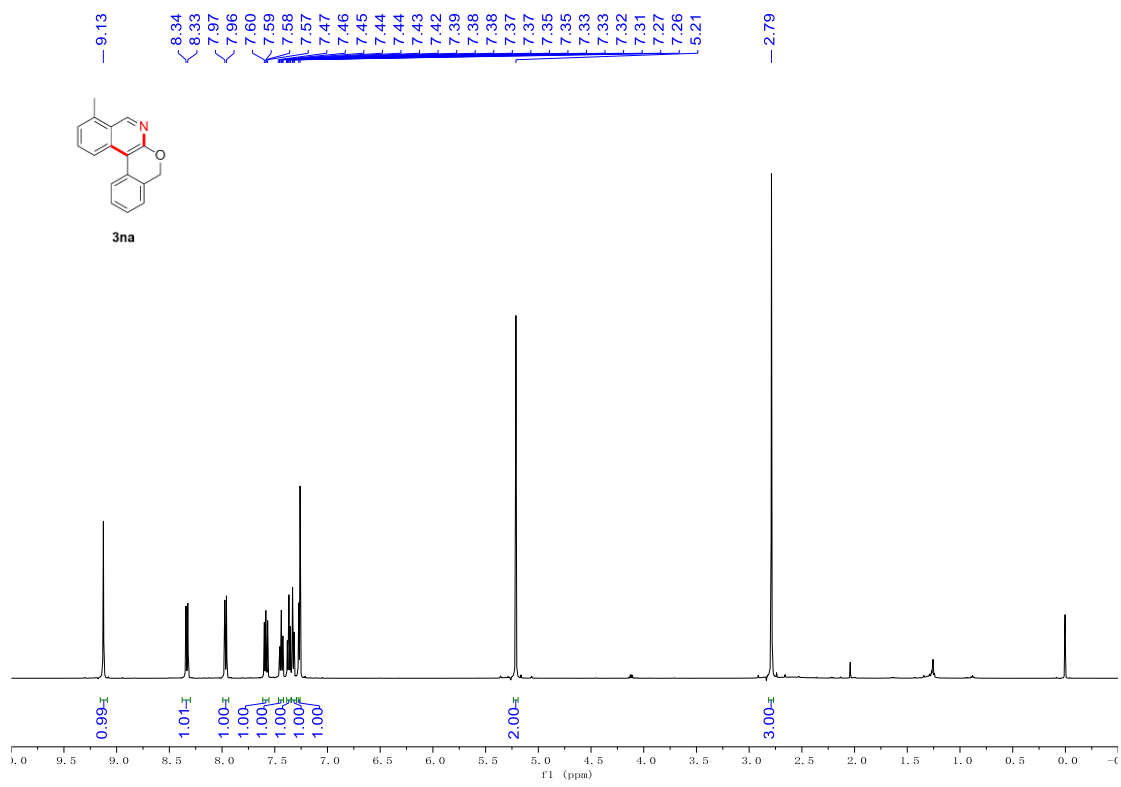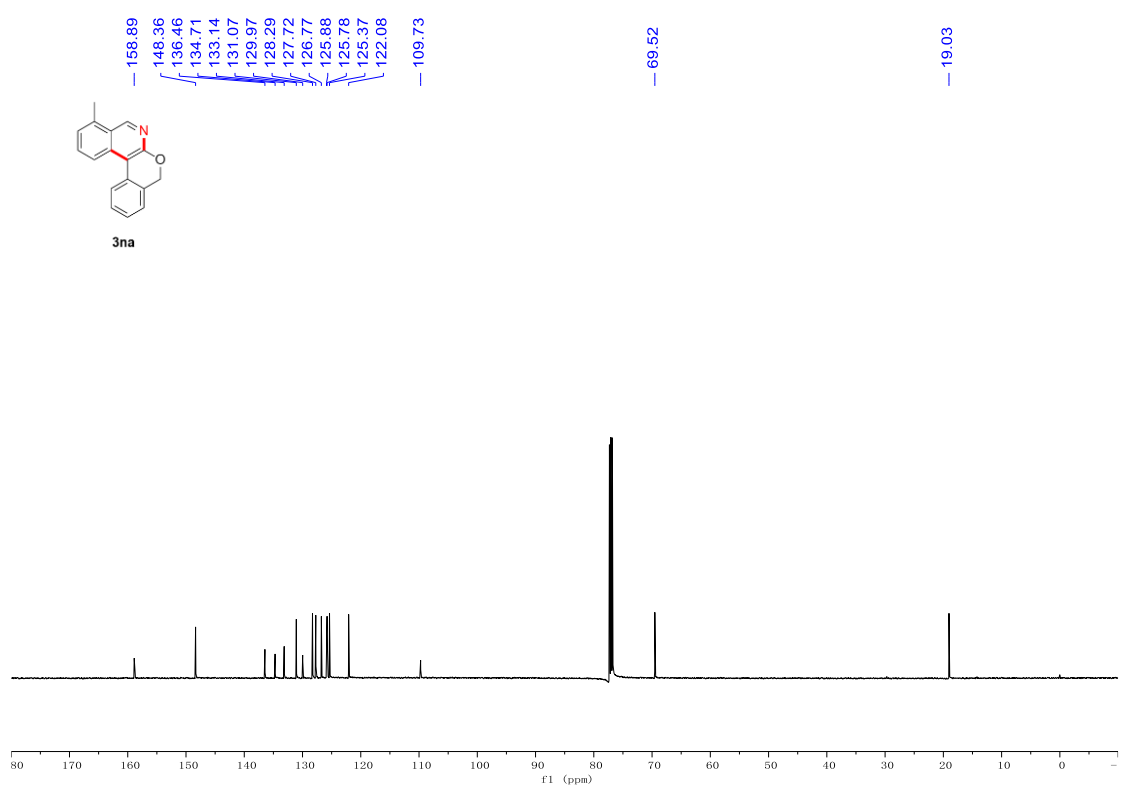

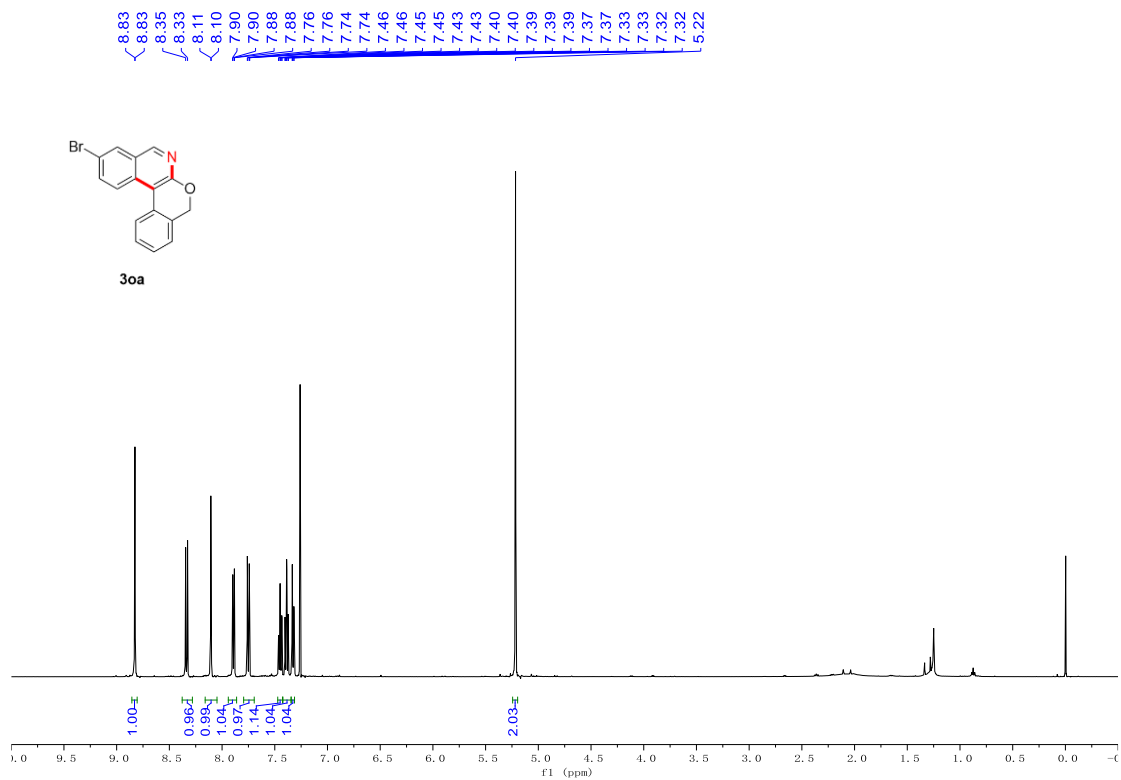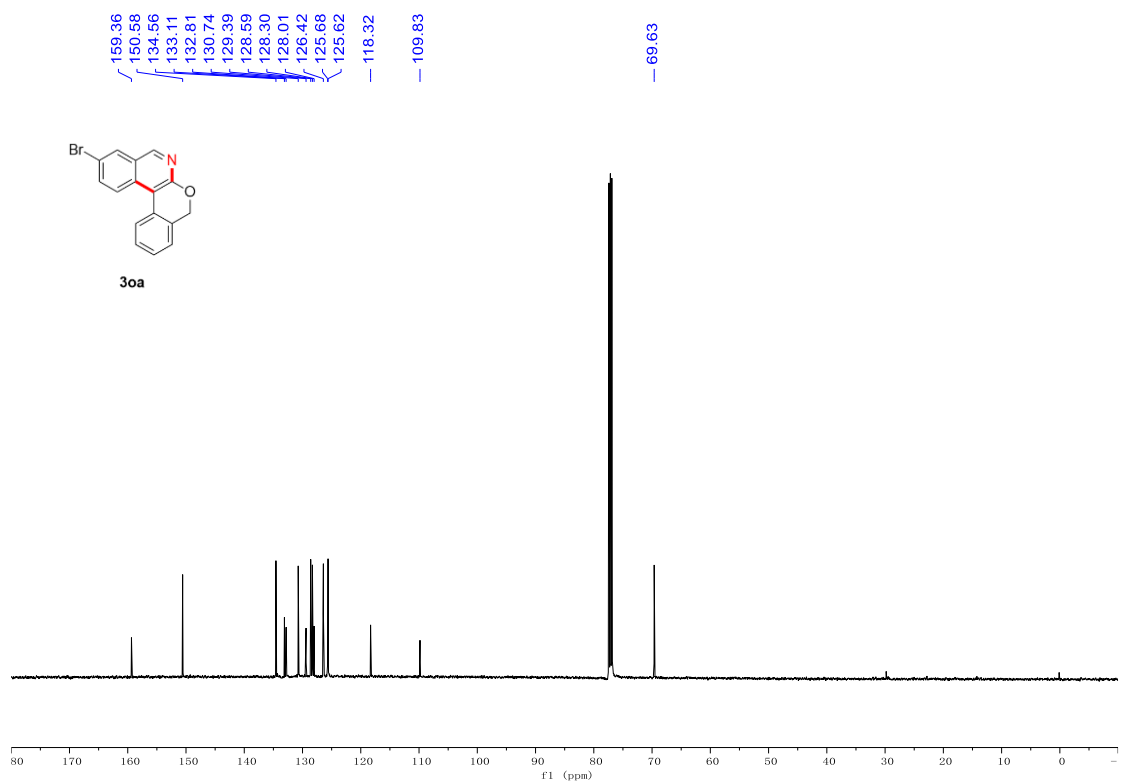

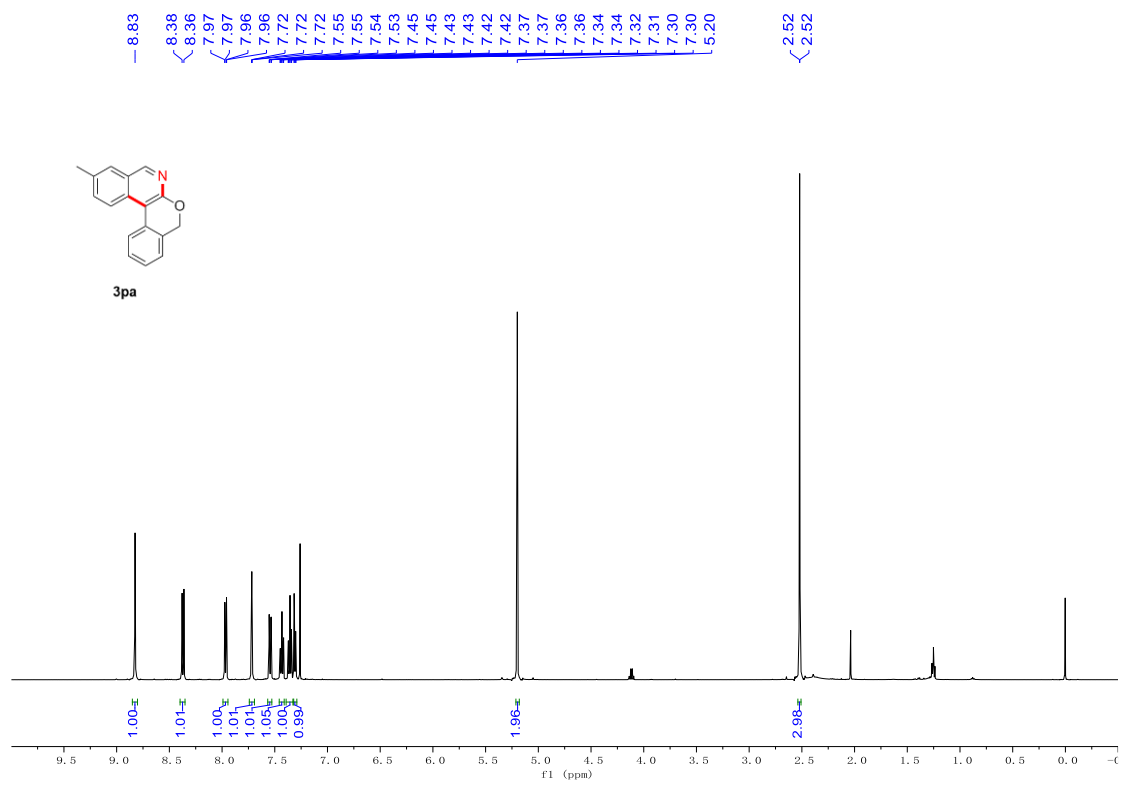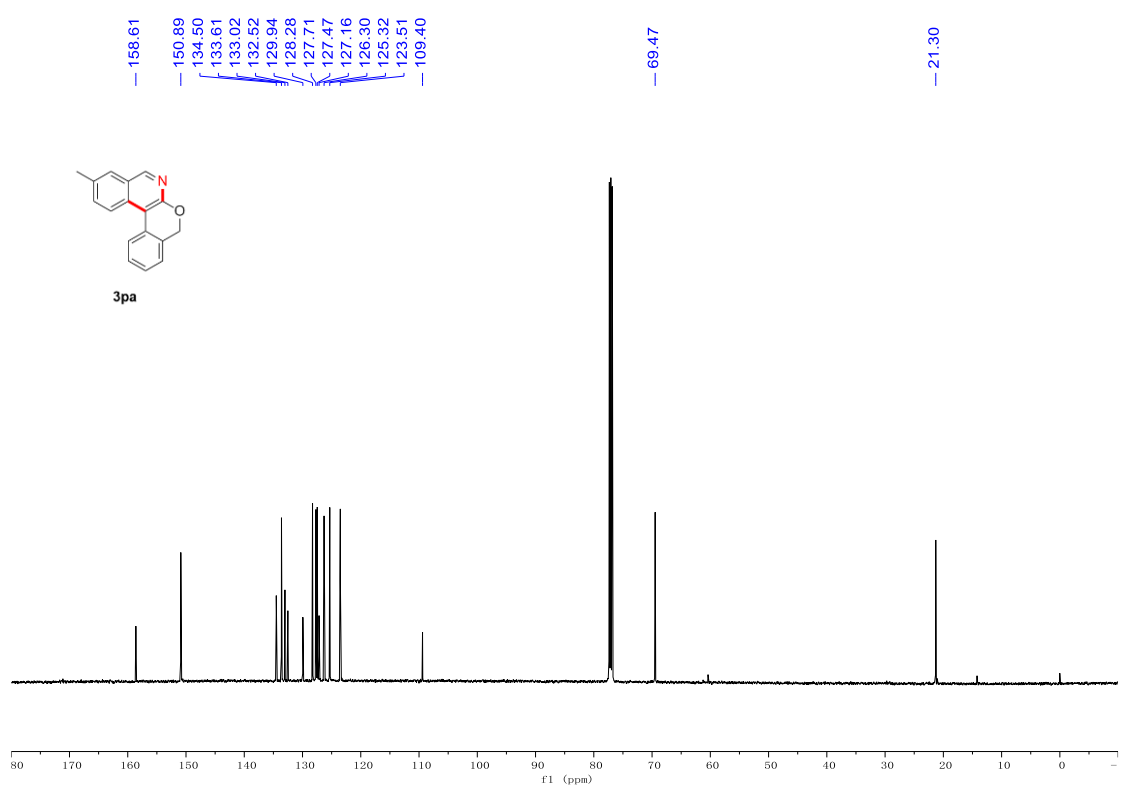



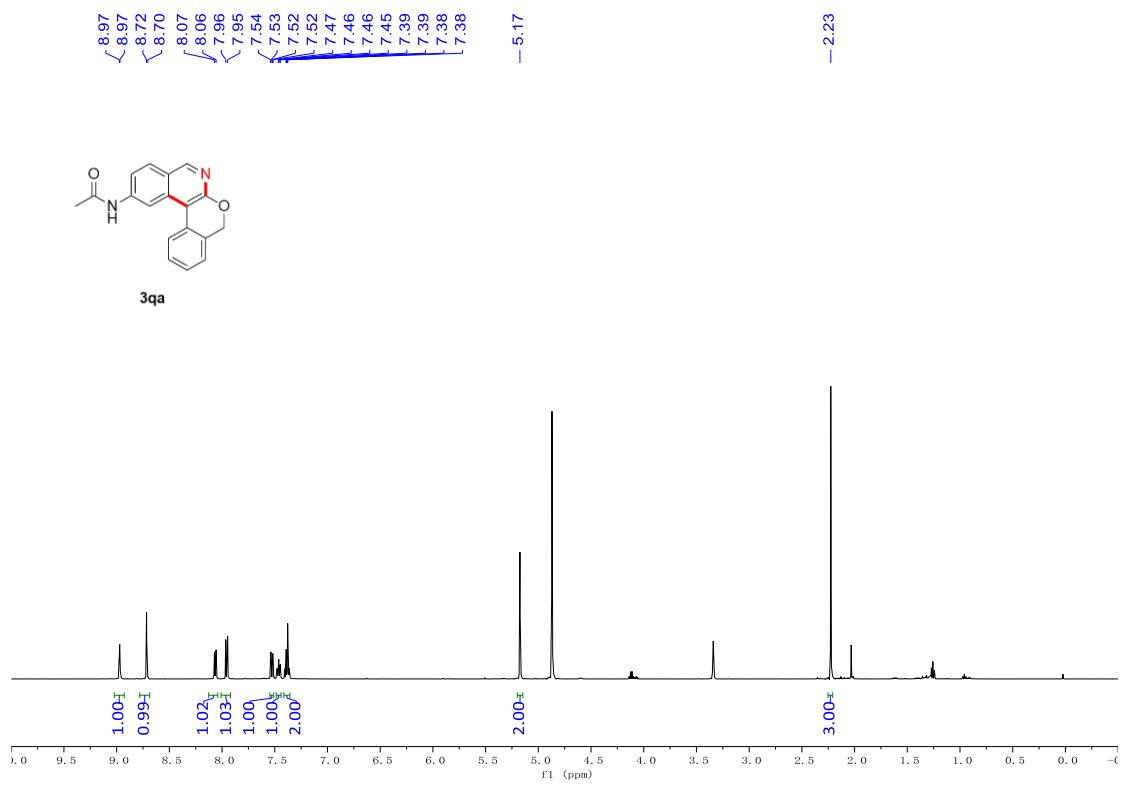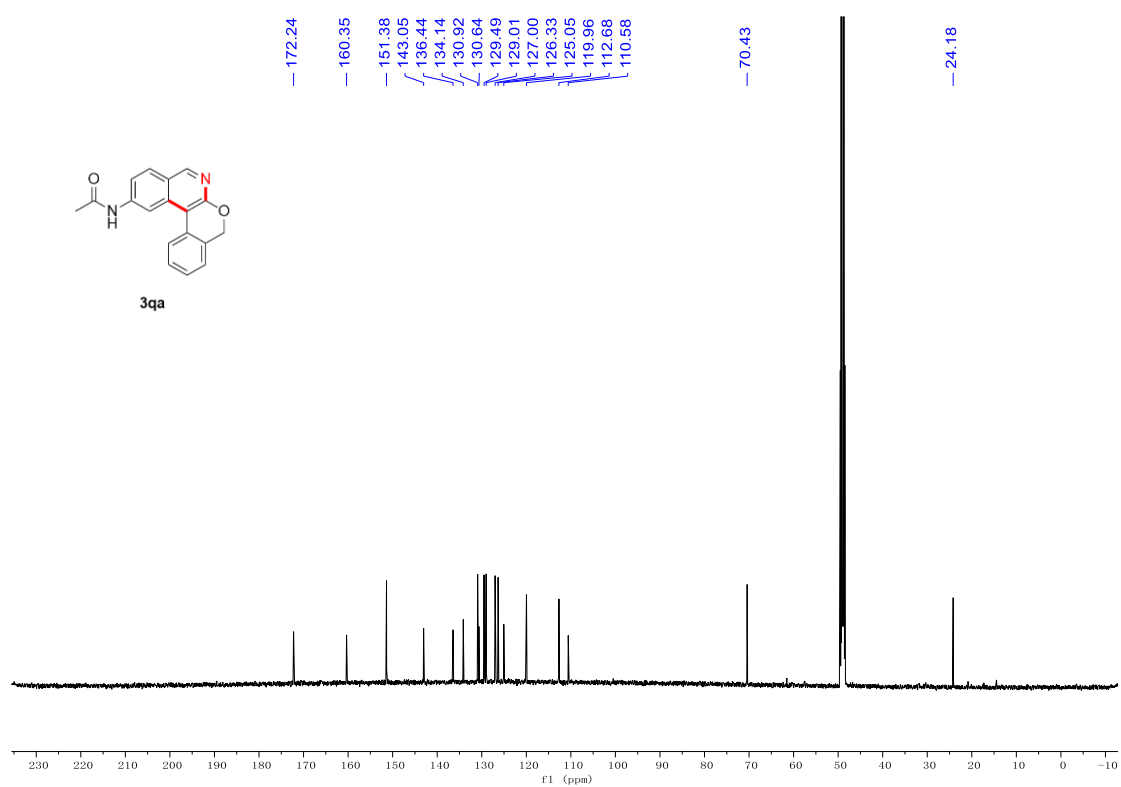

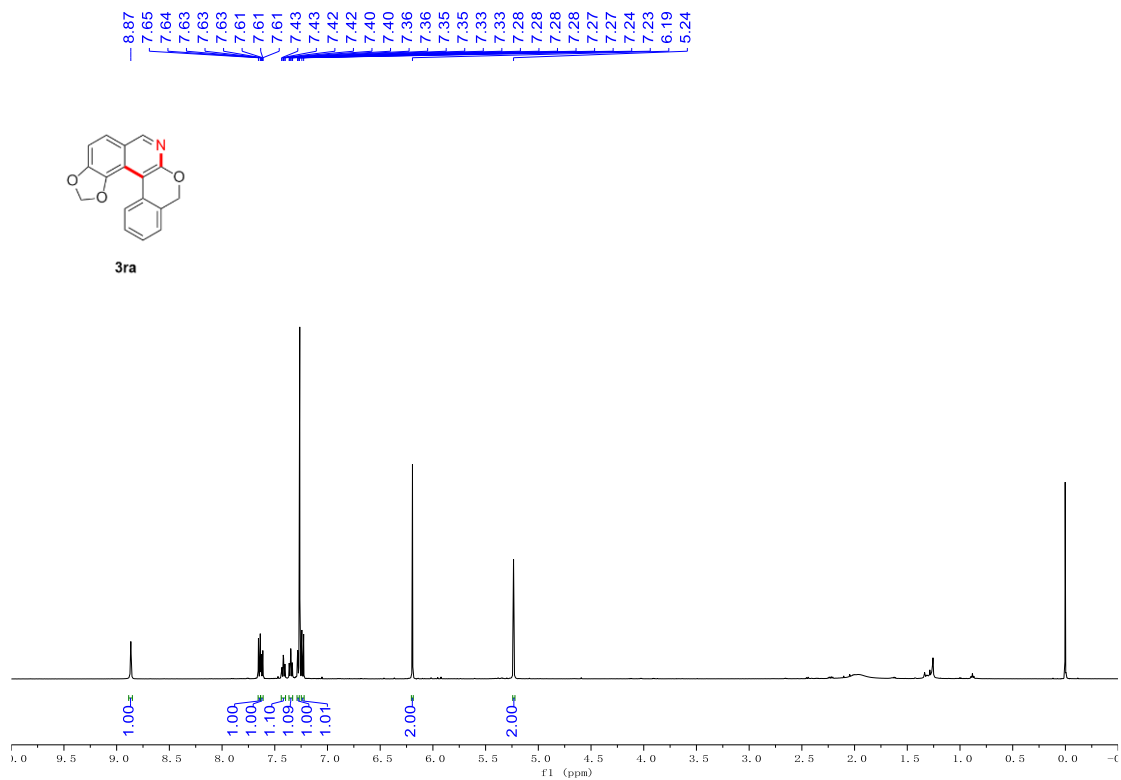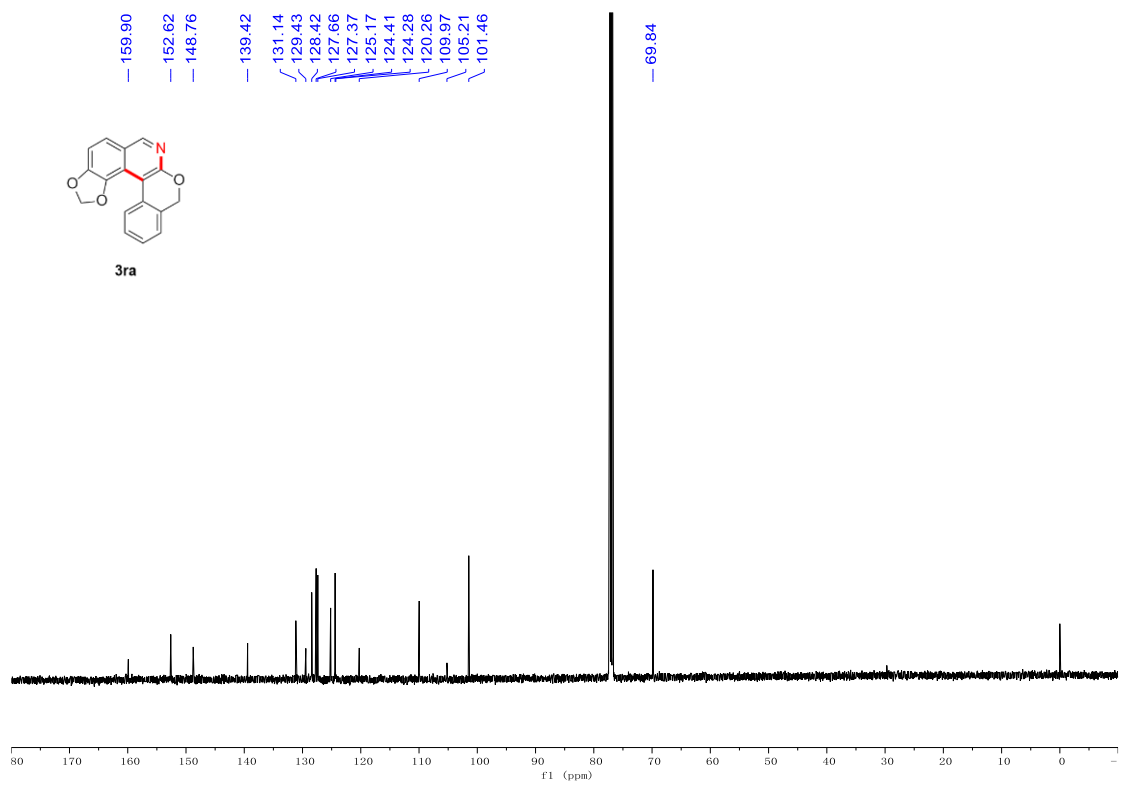

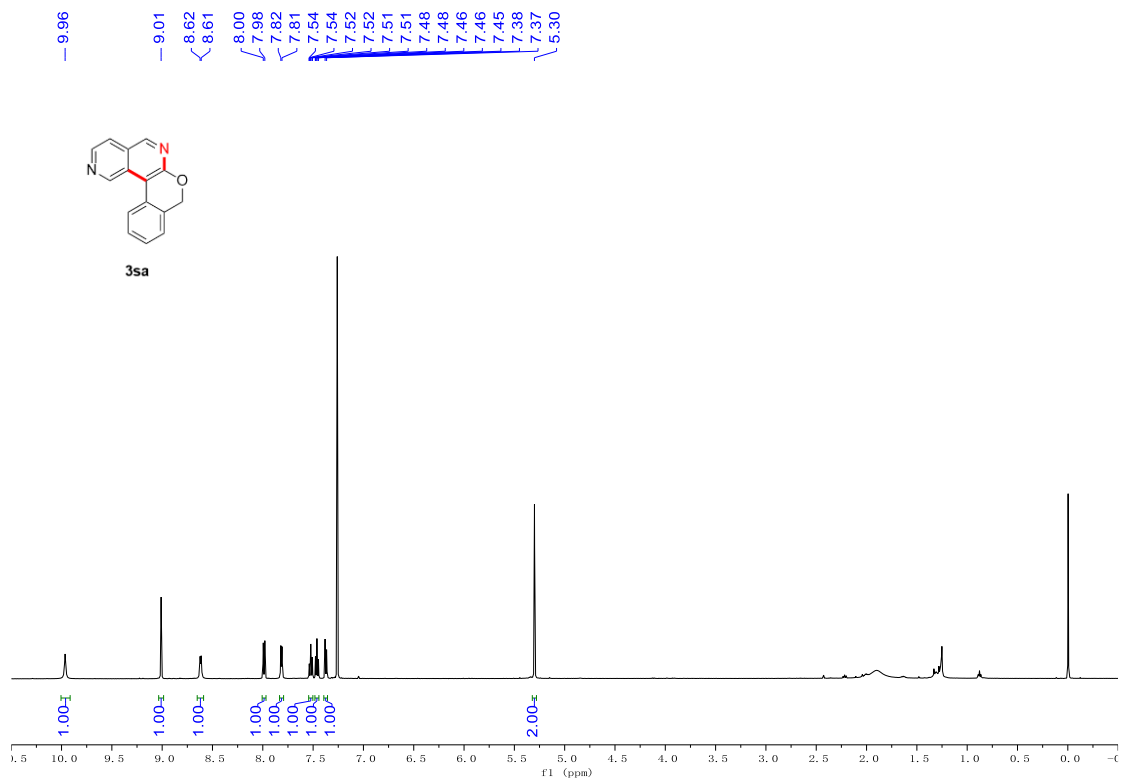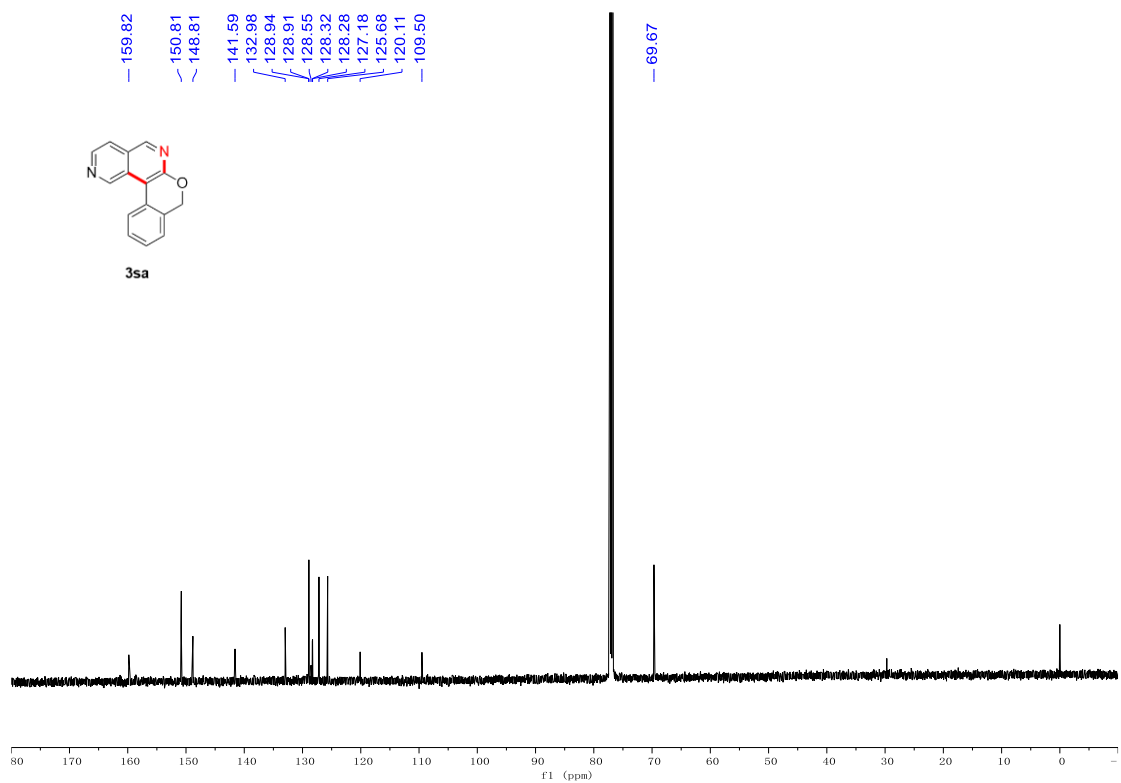

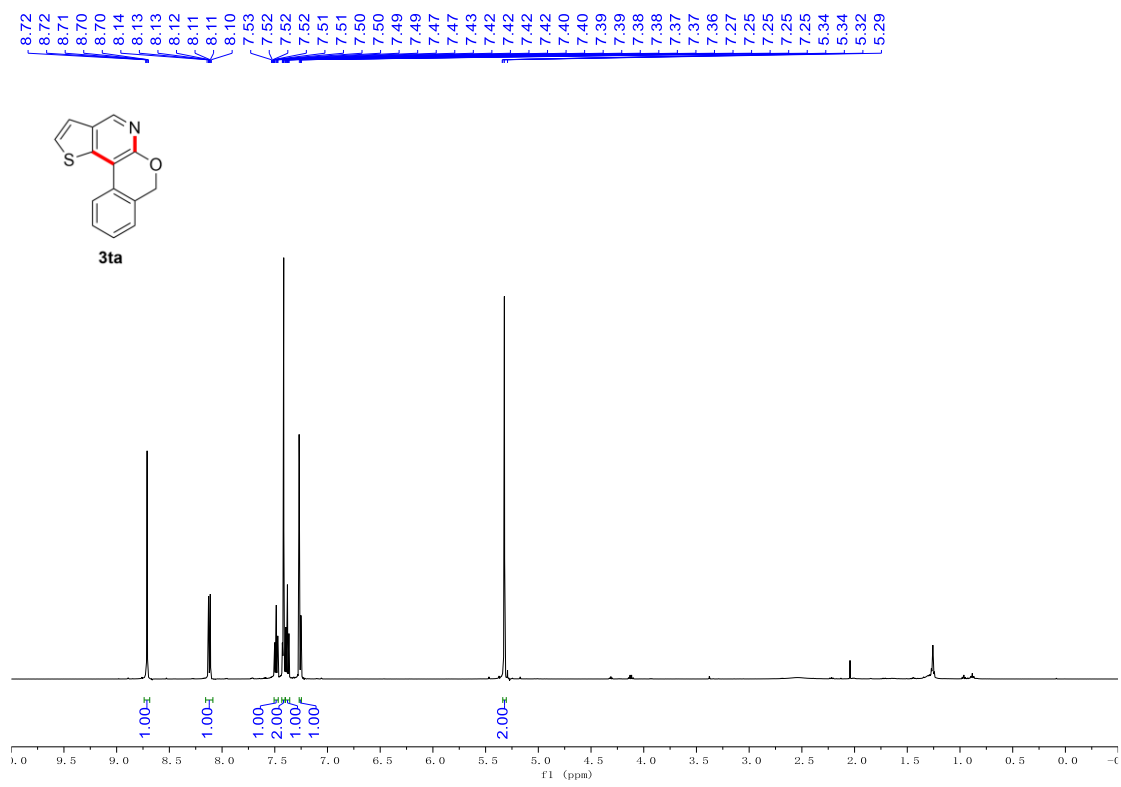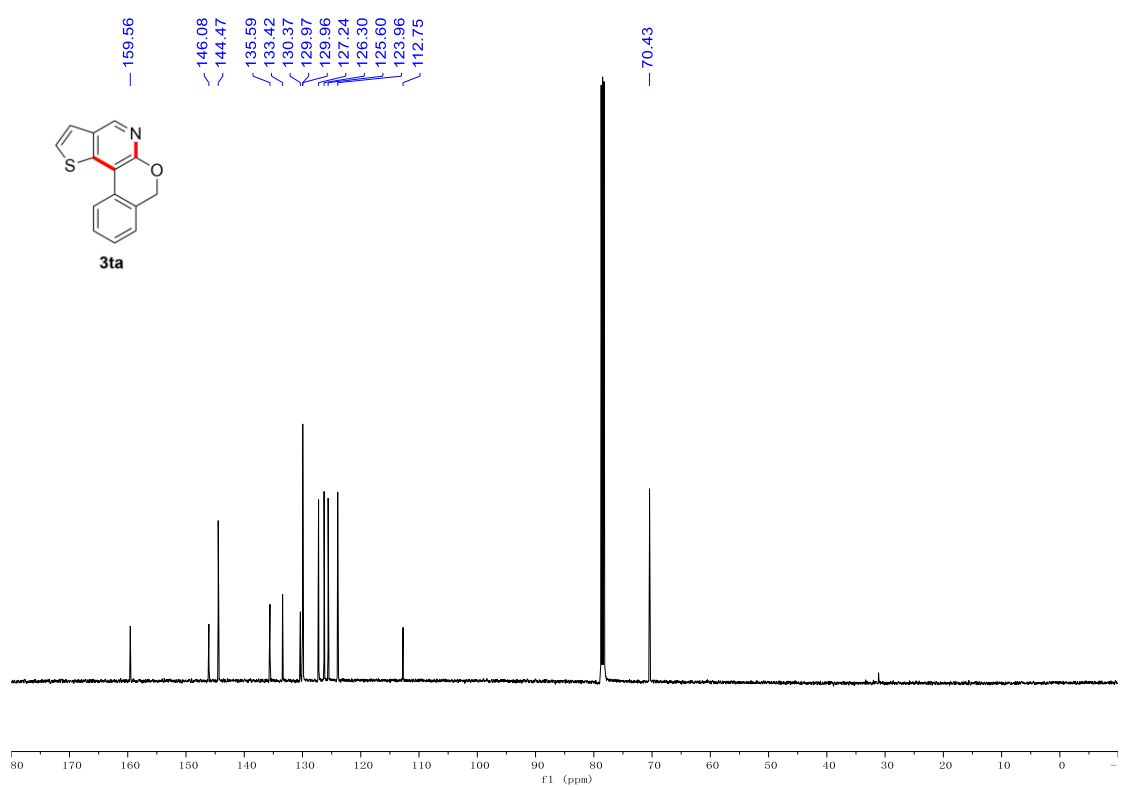

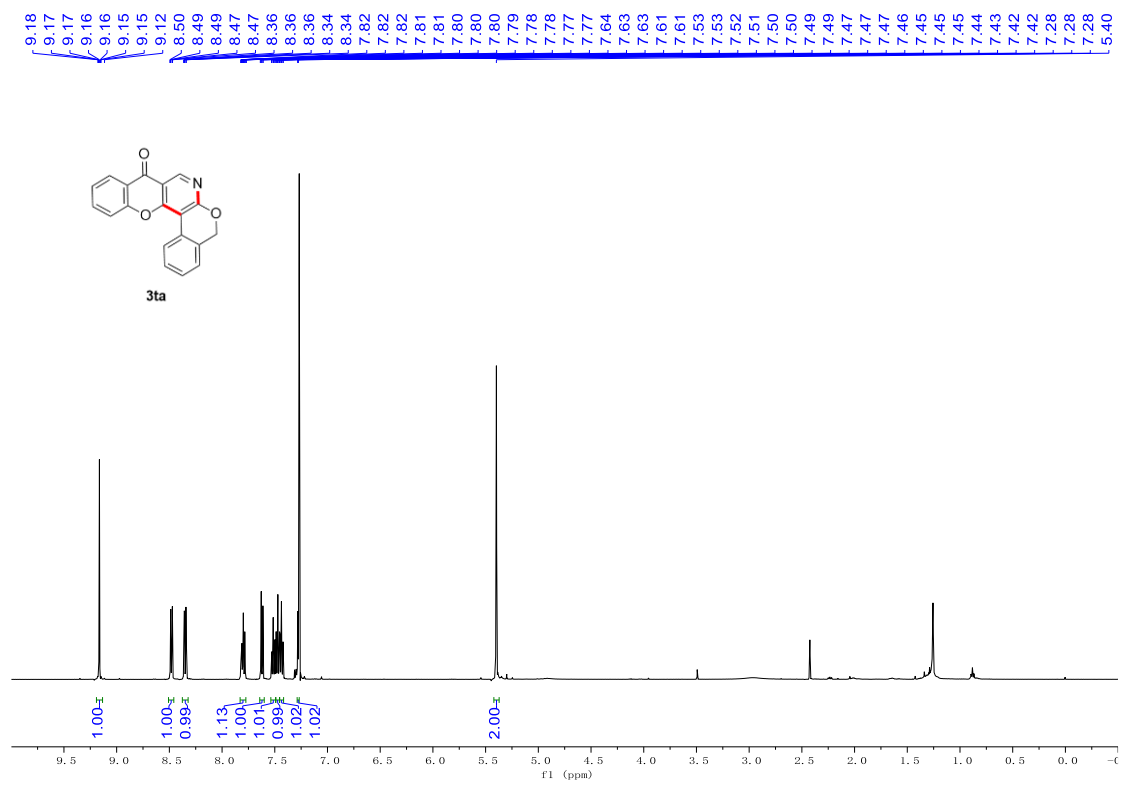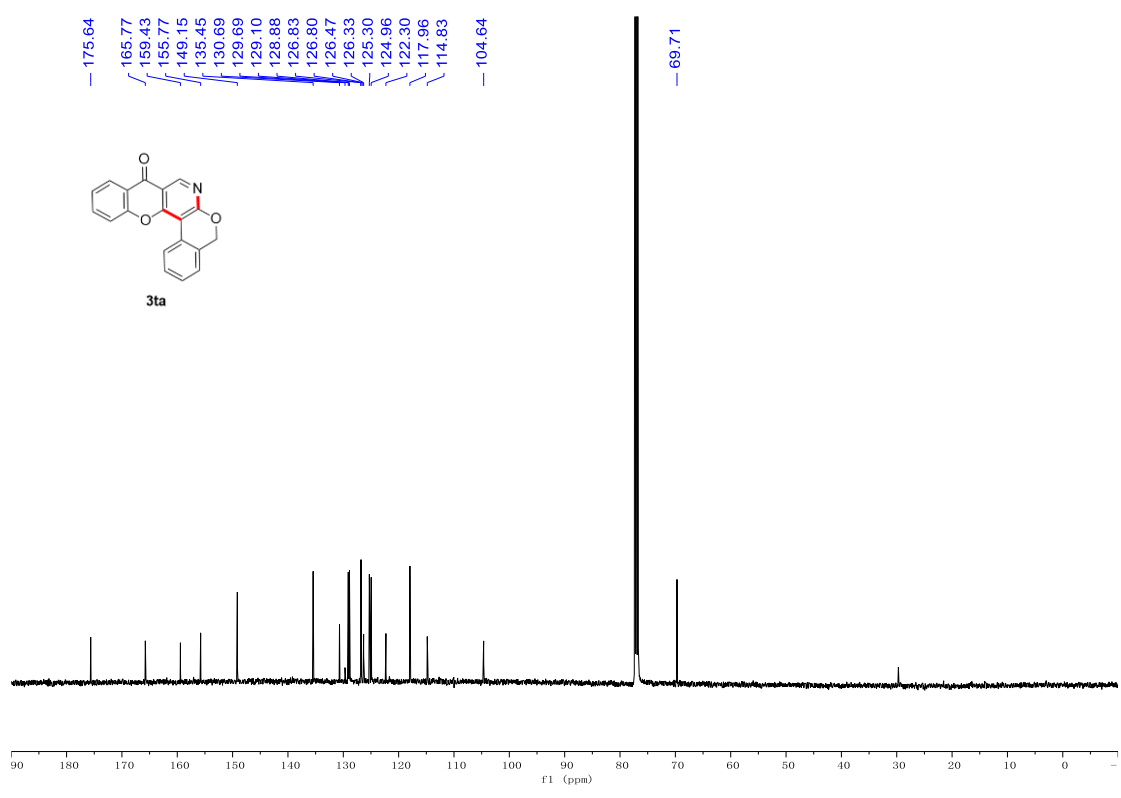

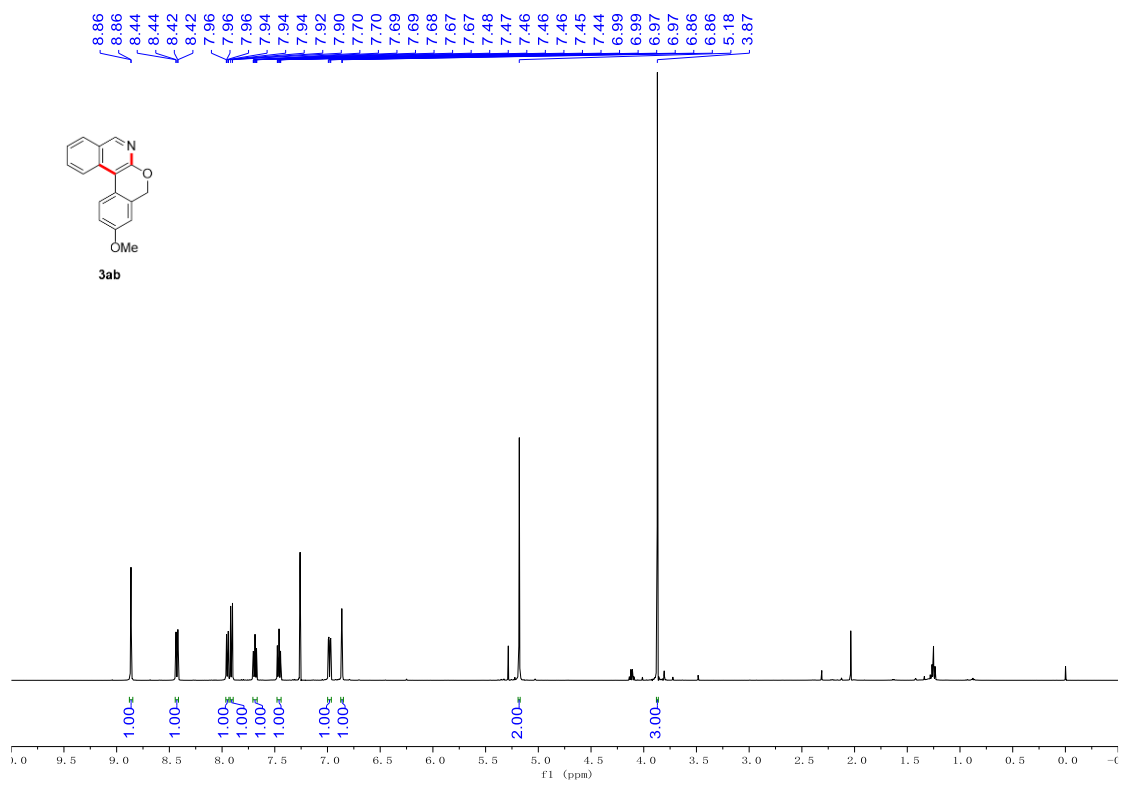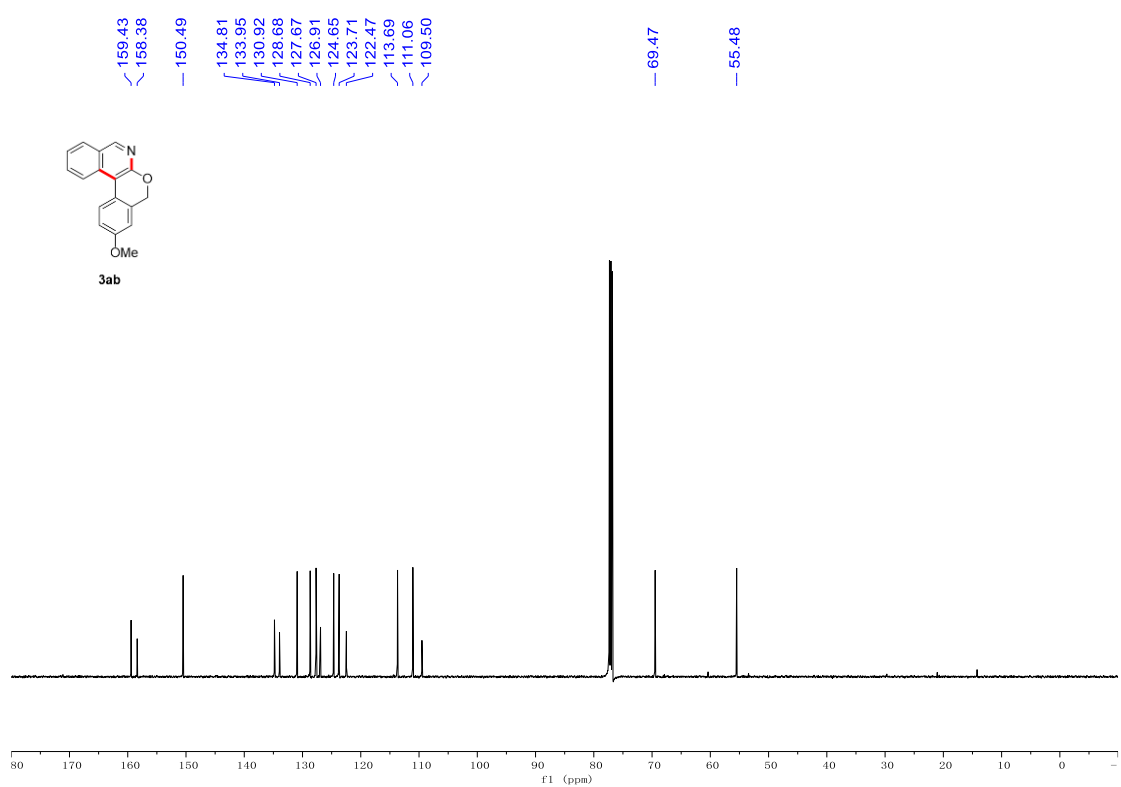

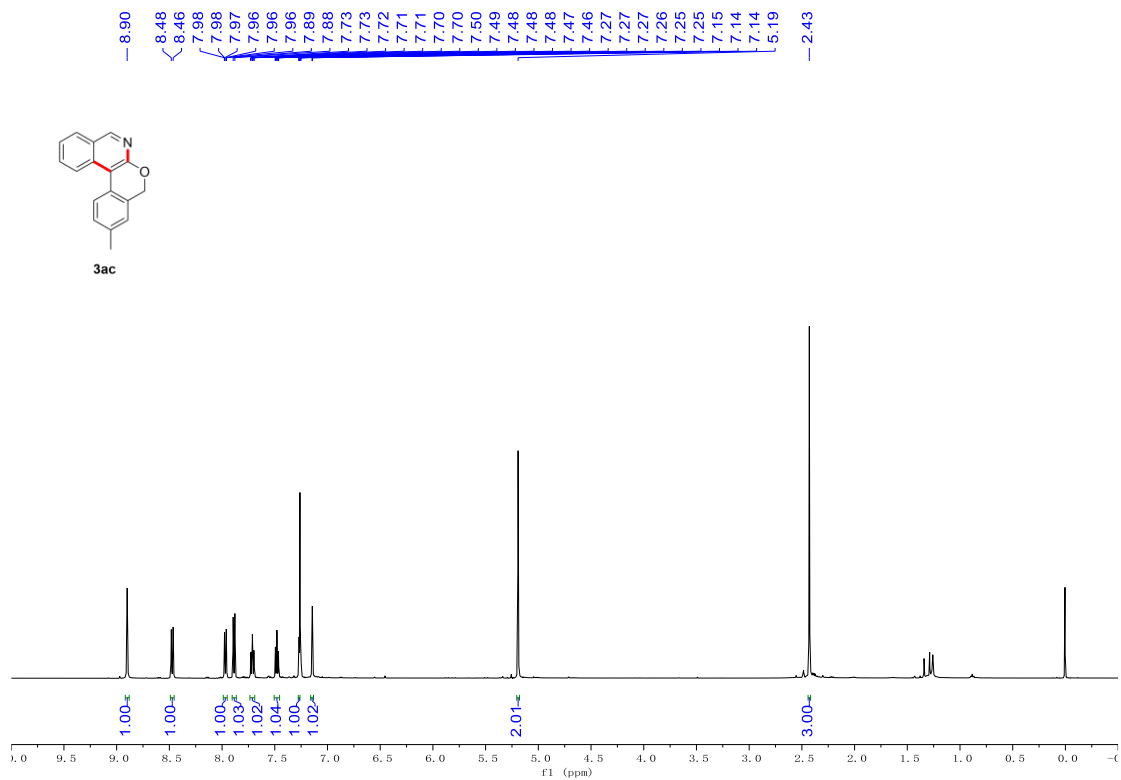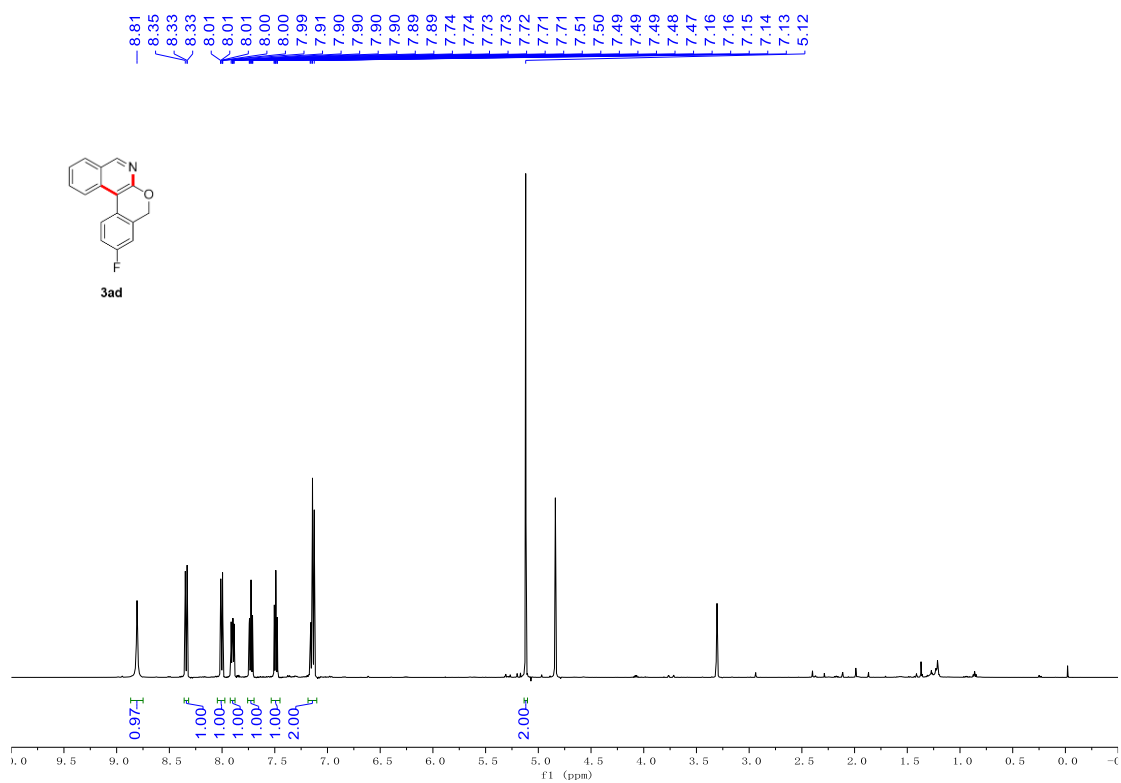

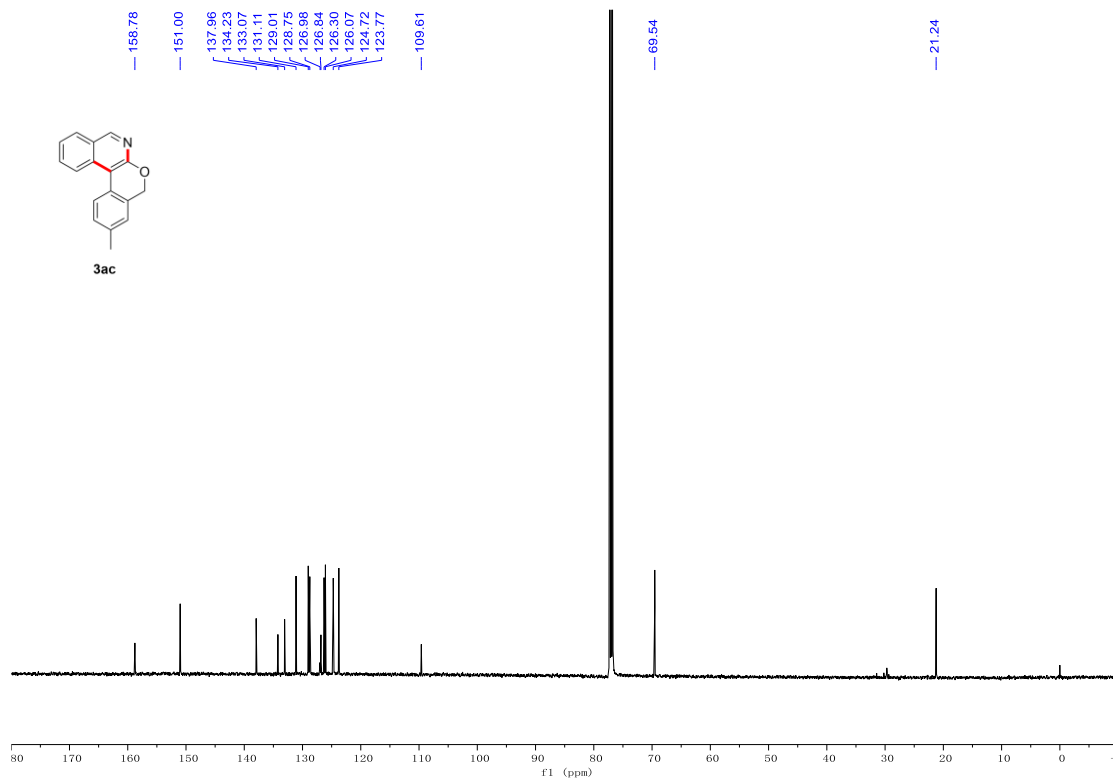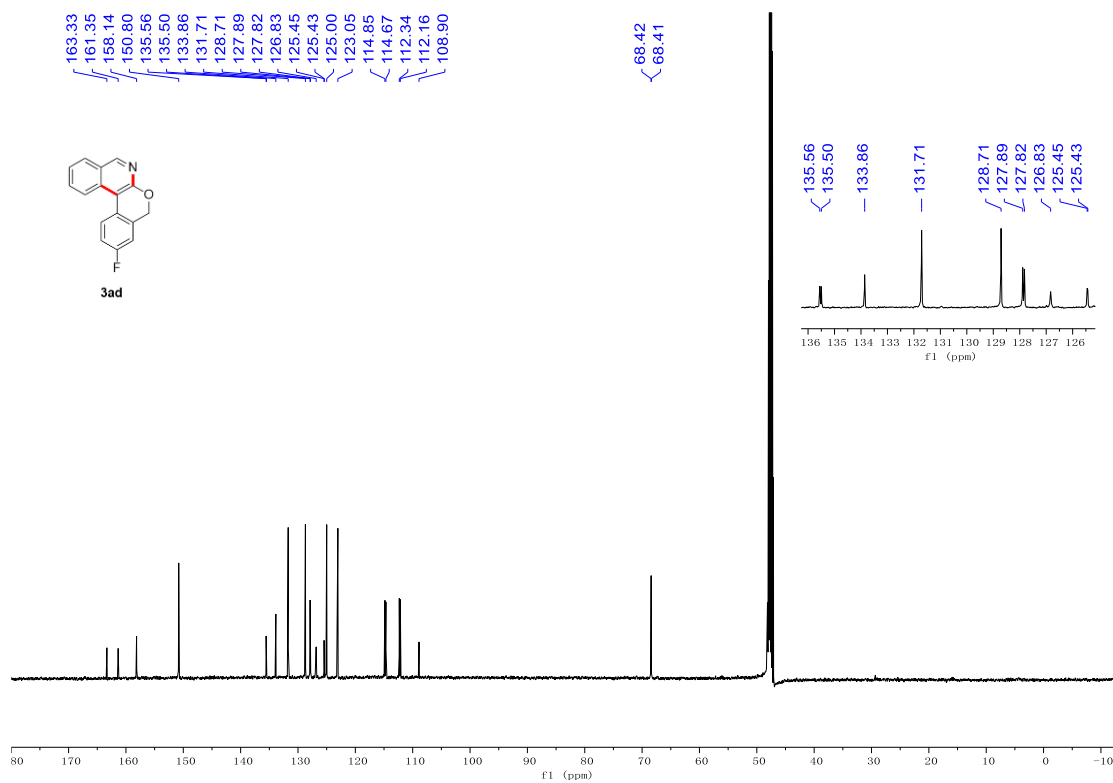



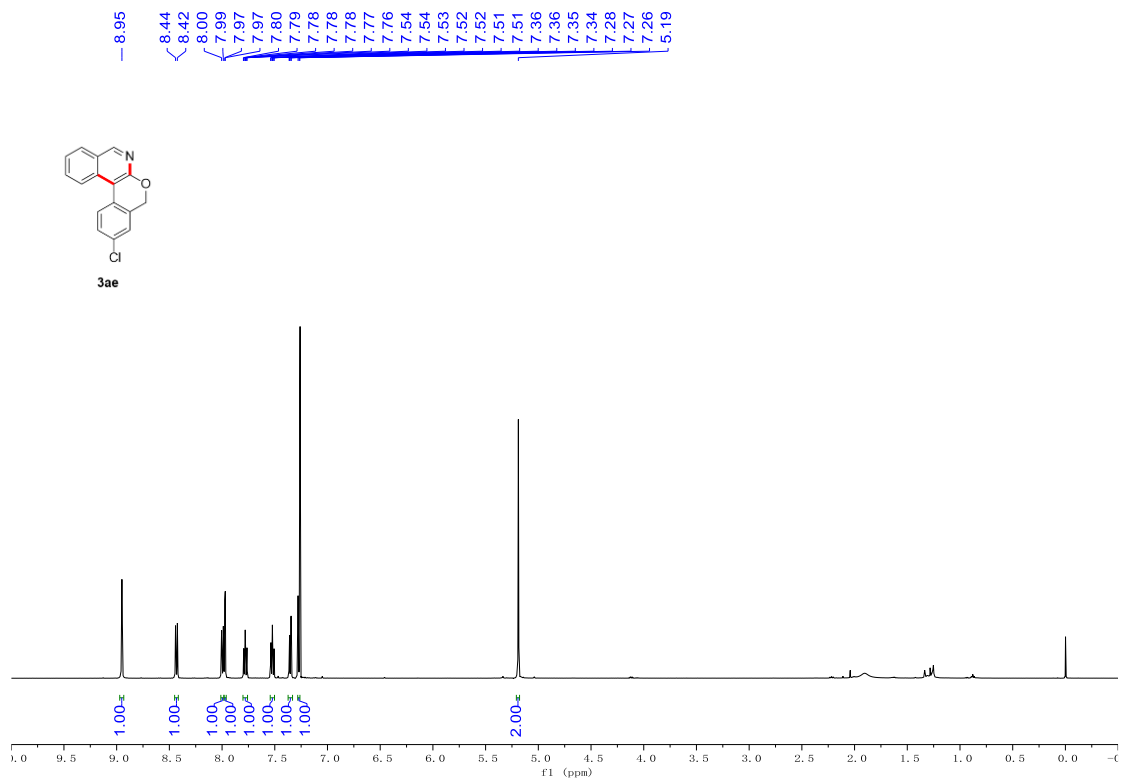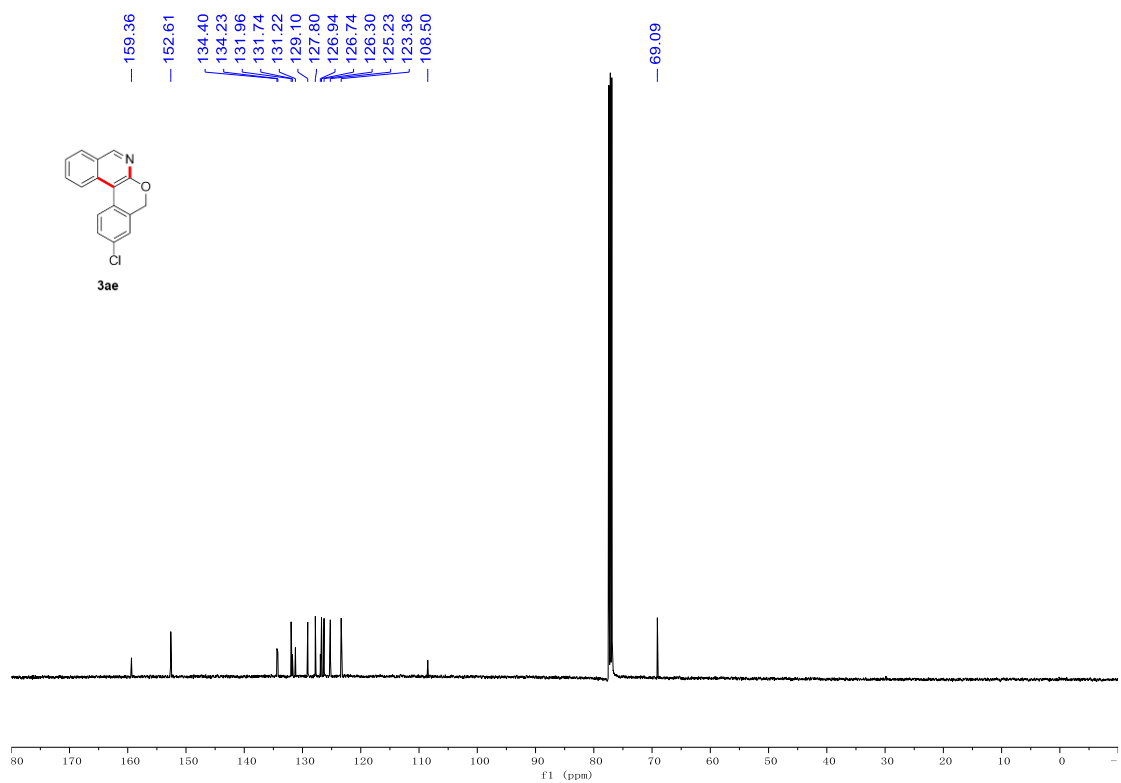

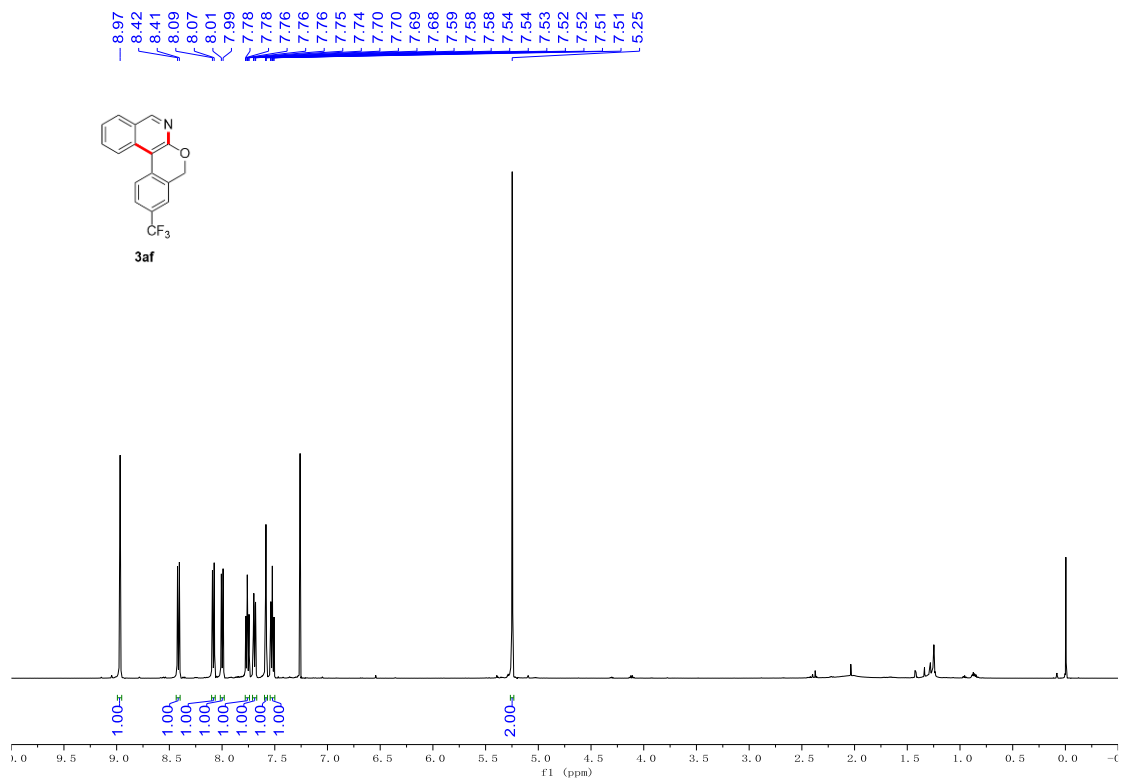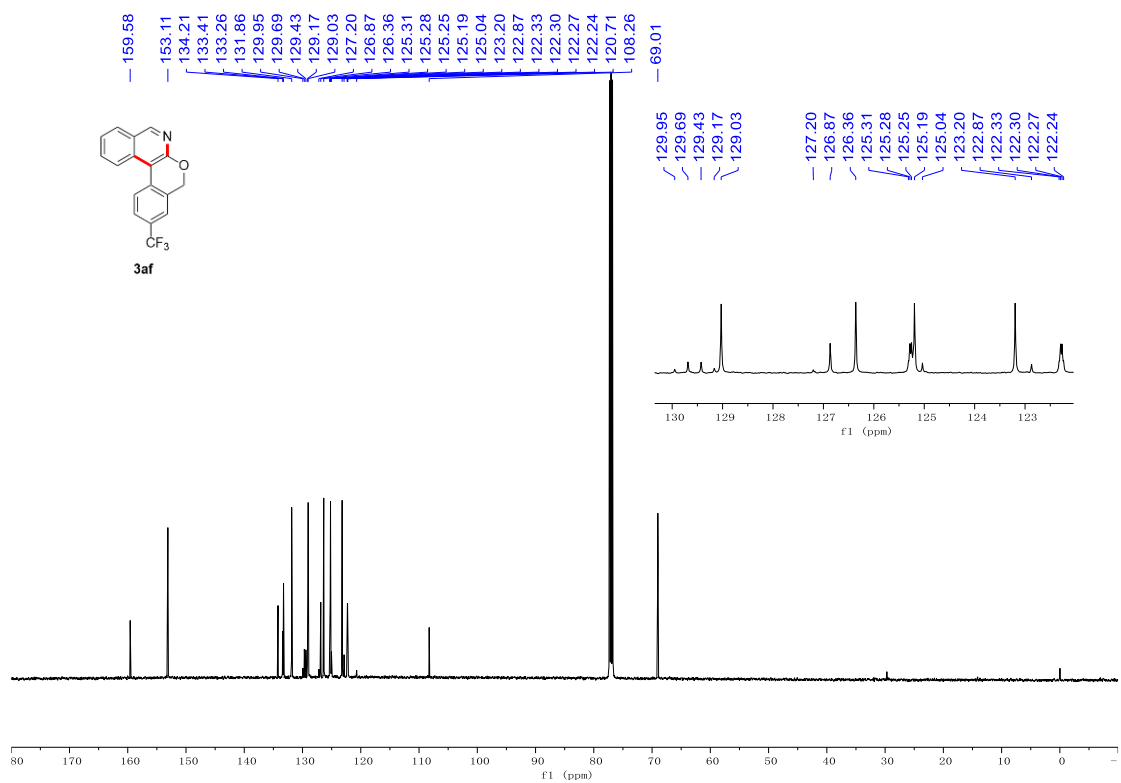

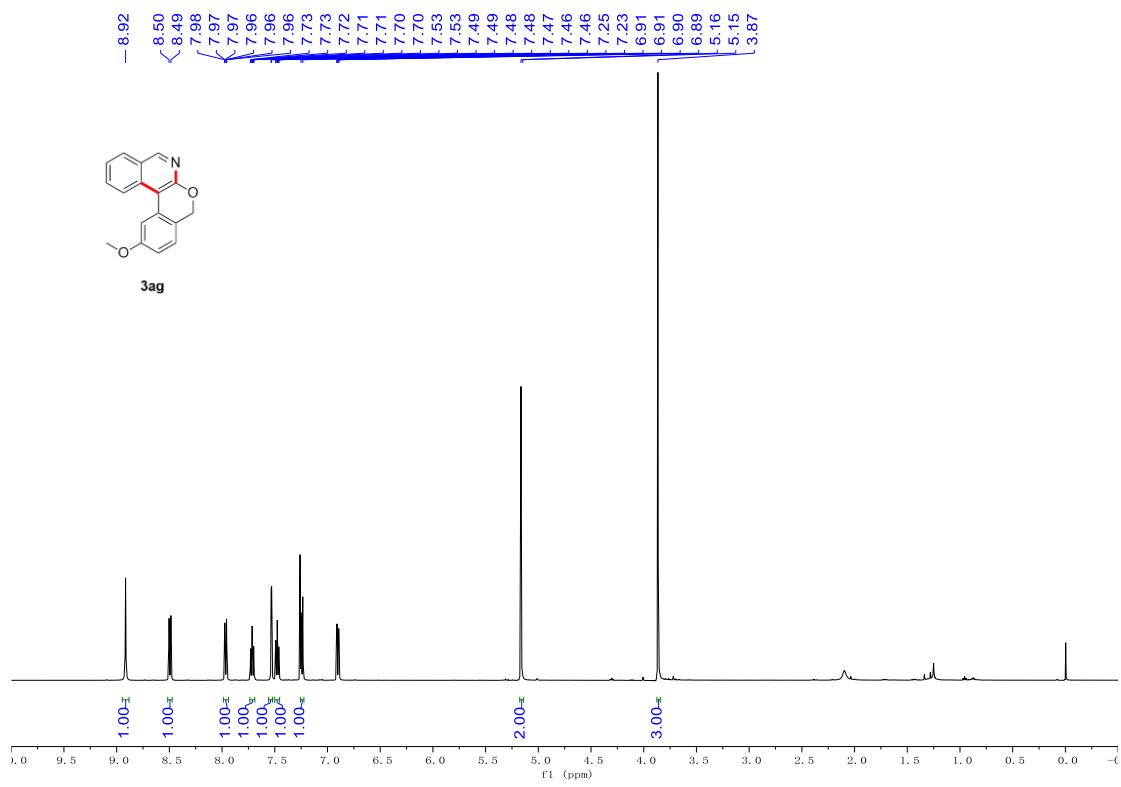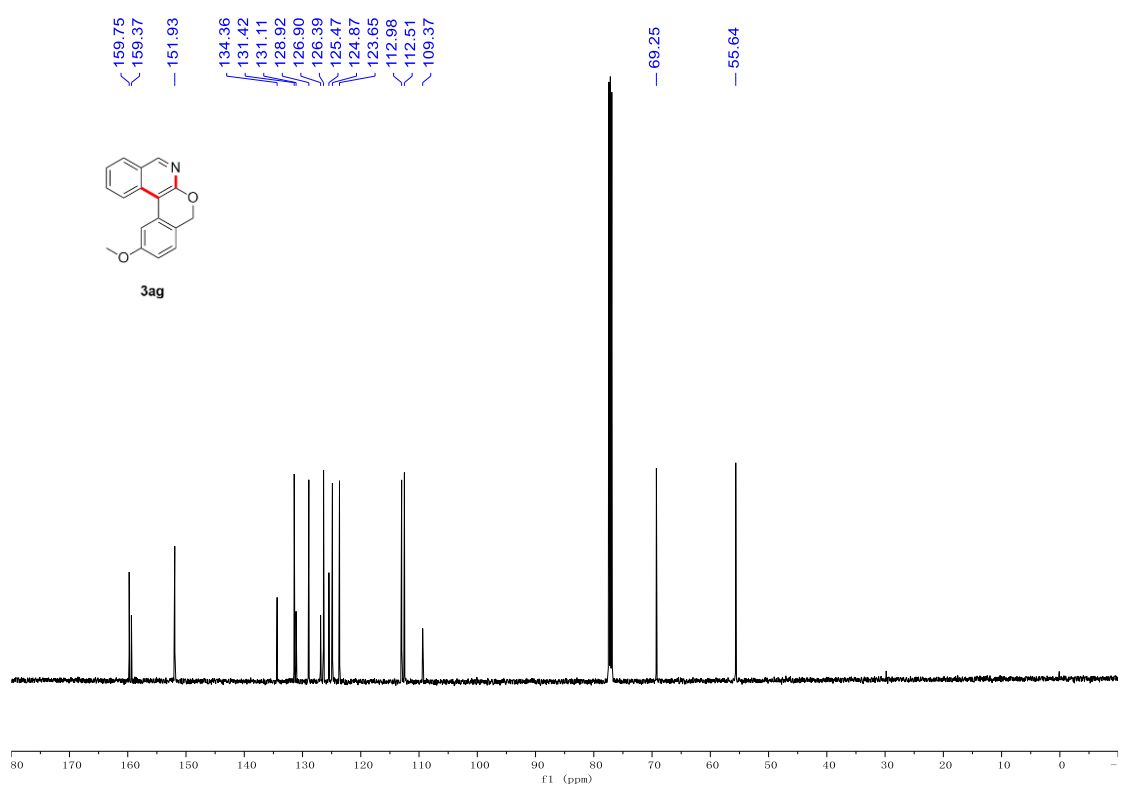

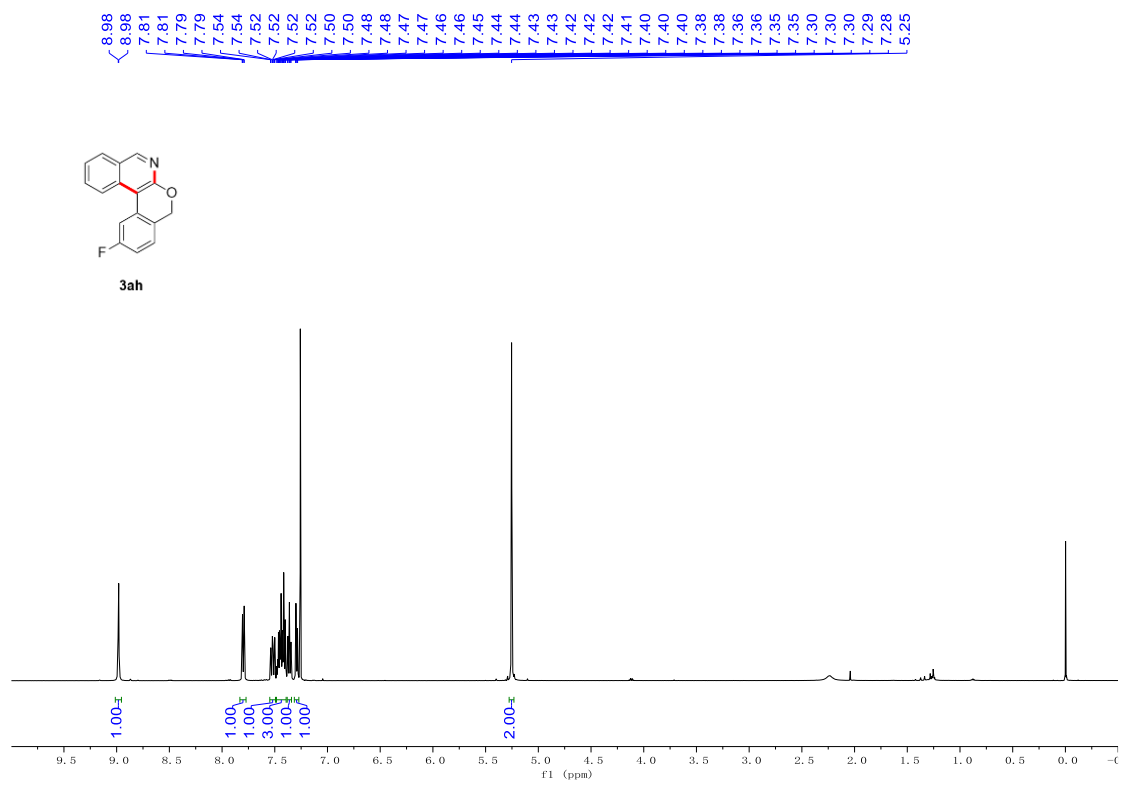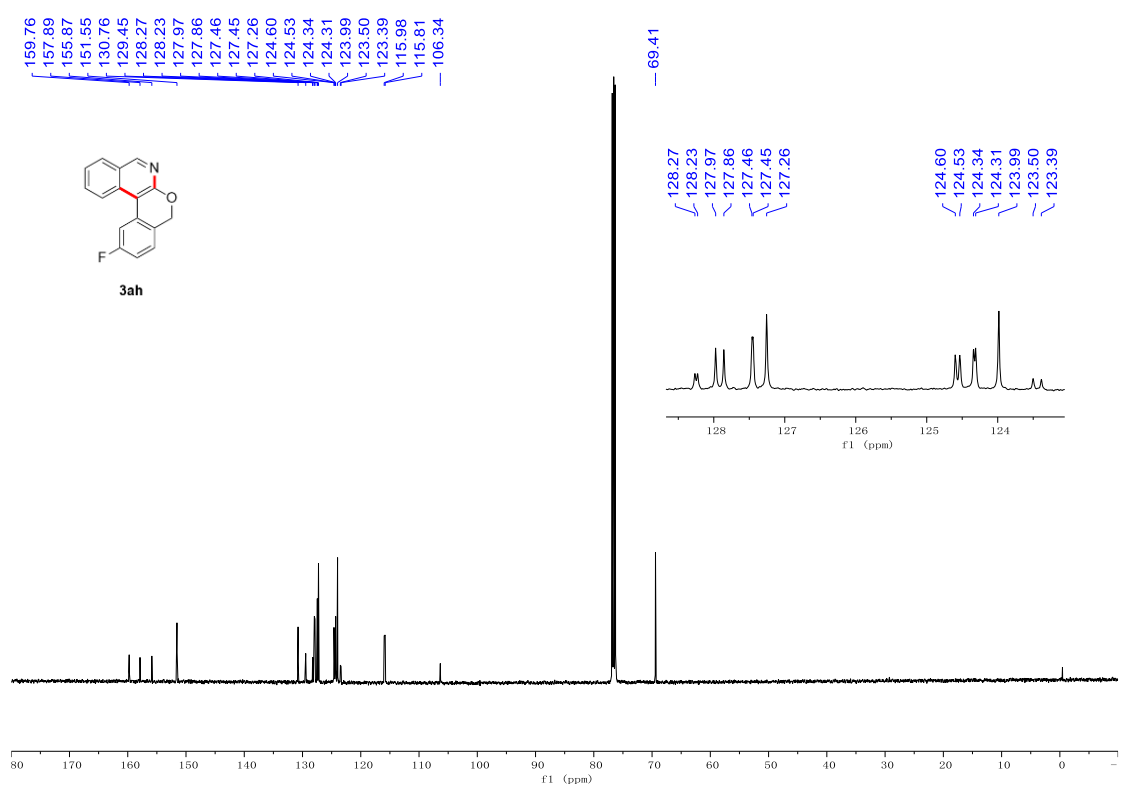

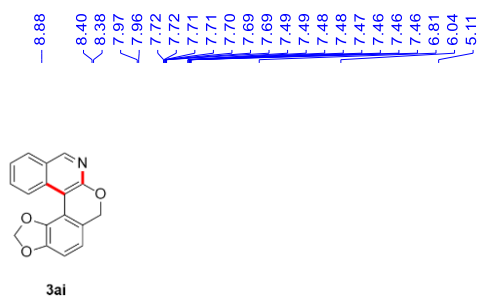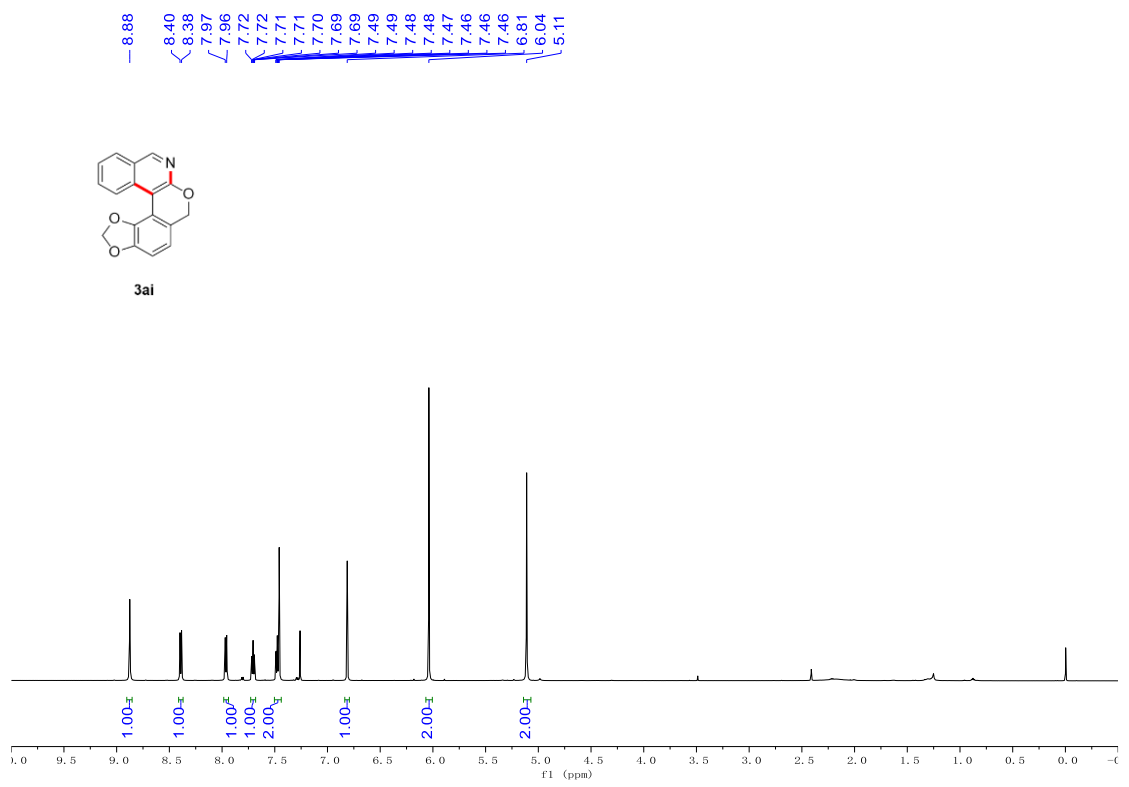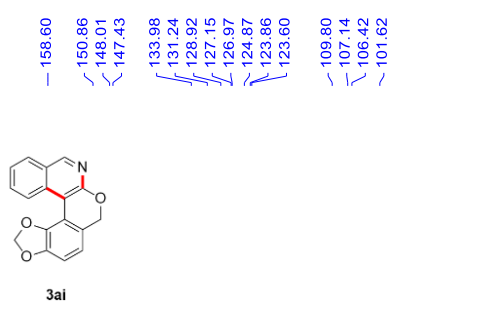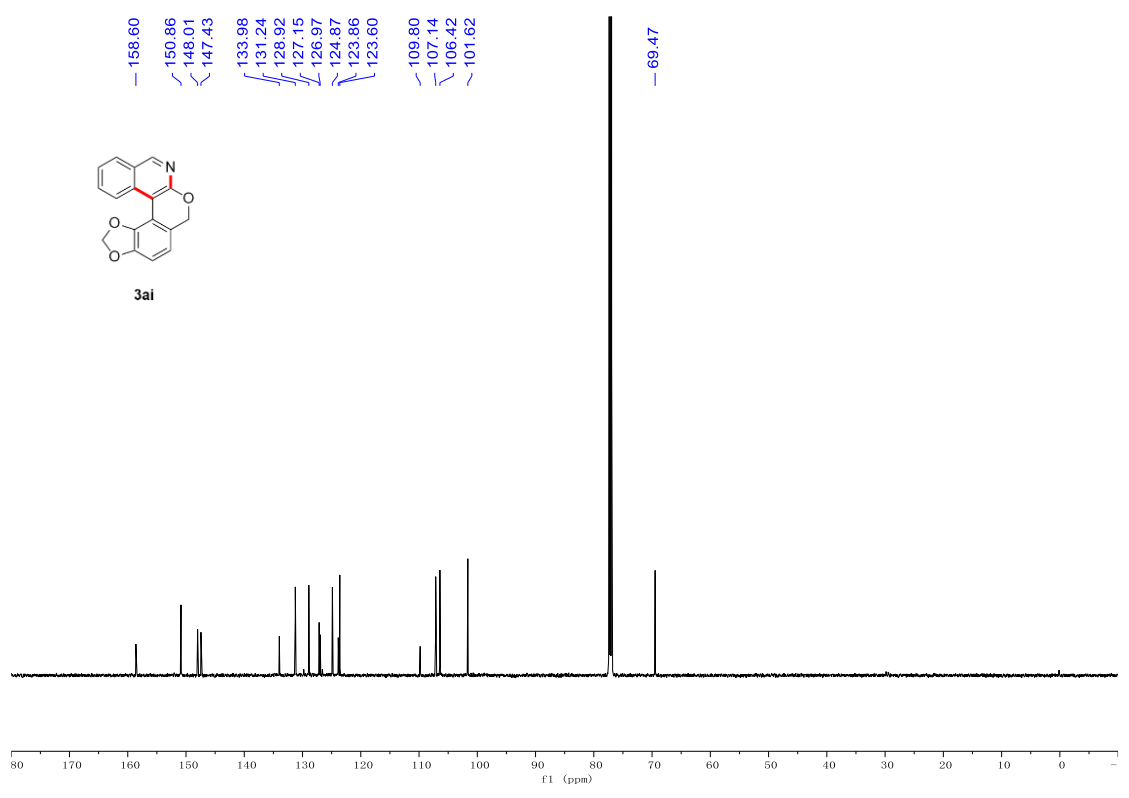

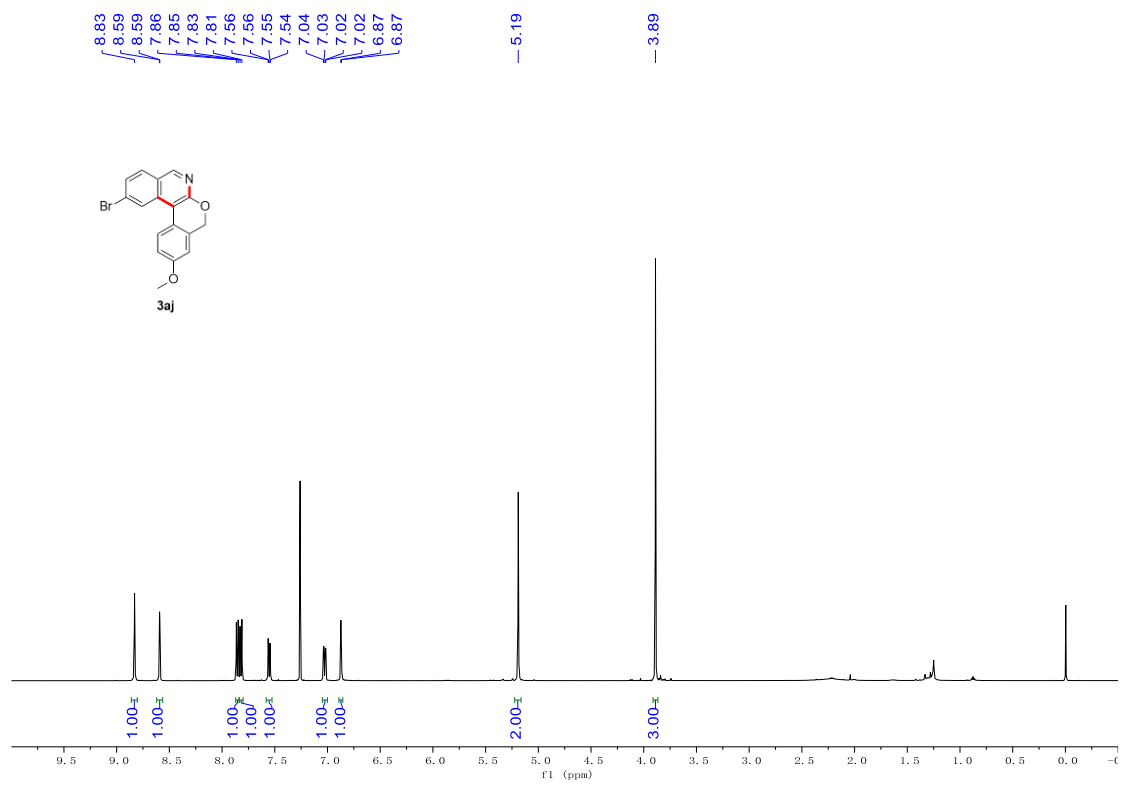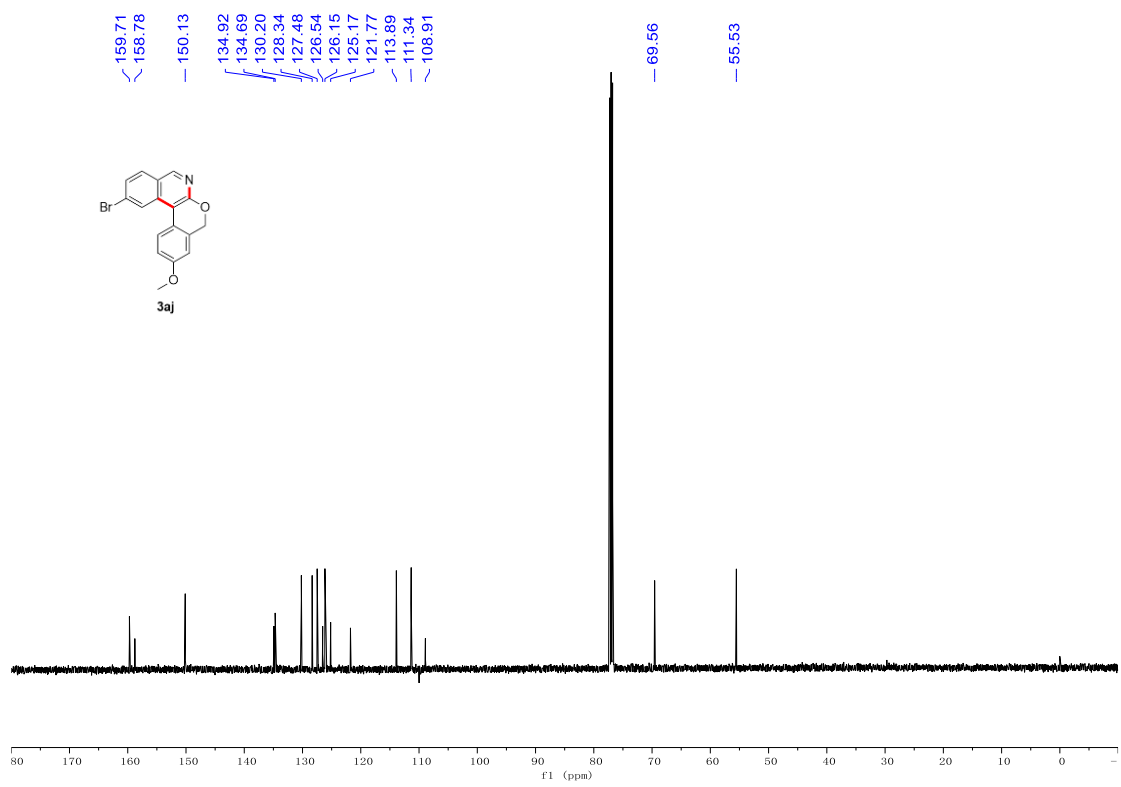

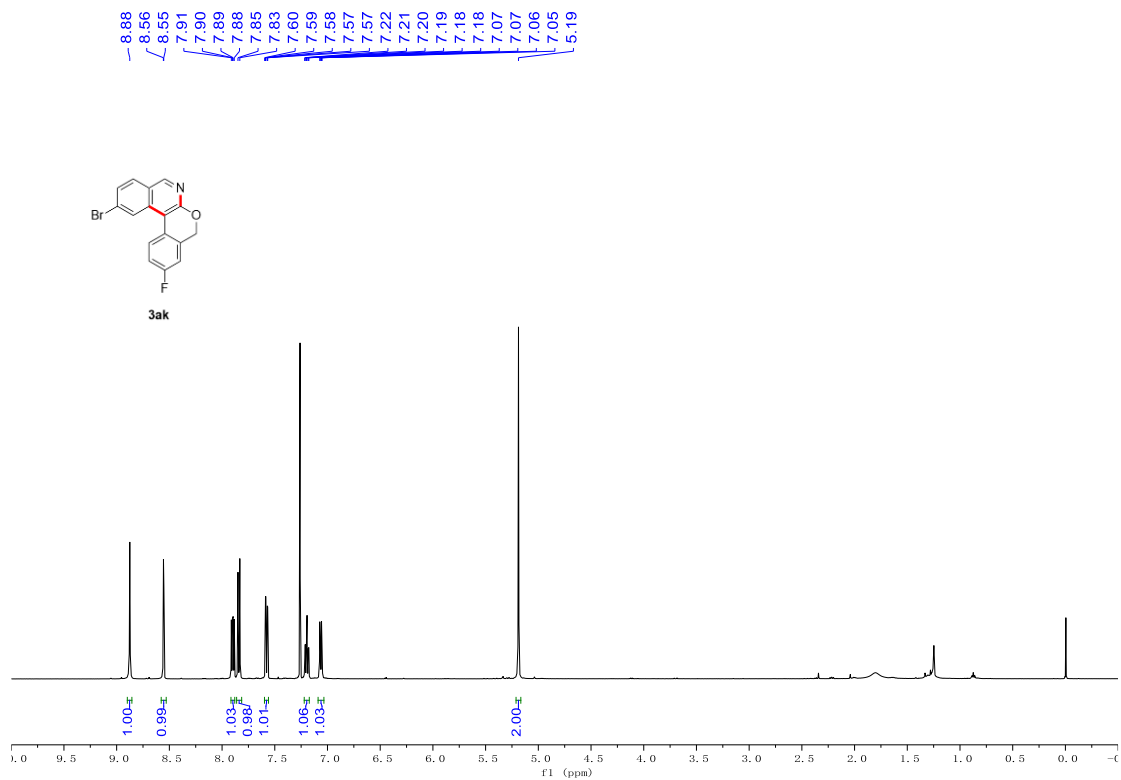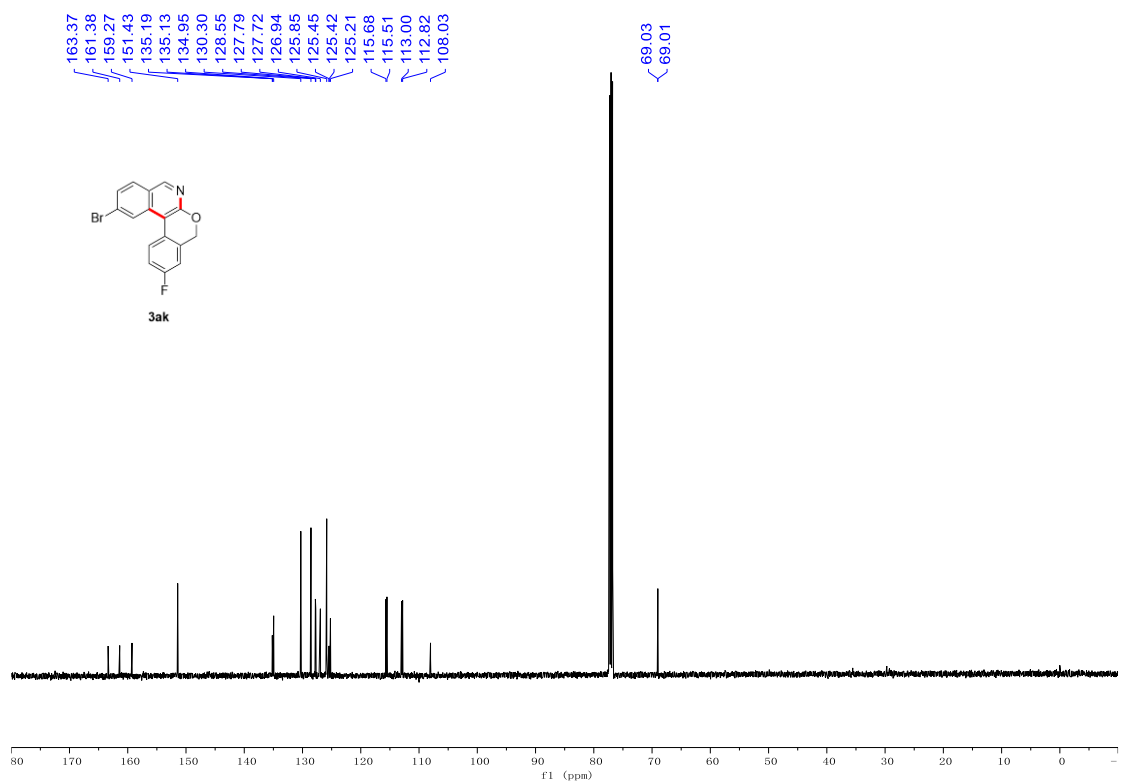

8.82  
 8.24  
 7.90  
 7.89  
 7.86  
 7.85  
 7.31  
 7.31  
 7.30  
 7.30  
 7.28  
 7.28  
 7.27  
 7.27  
 7.26  
 7.14  
 7.14  
 5.17

2.57  
 2.57  
 2.43

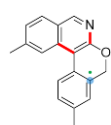

3aI

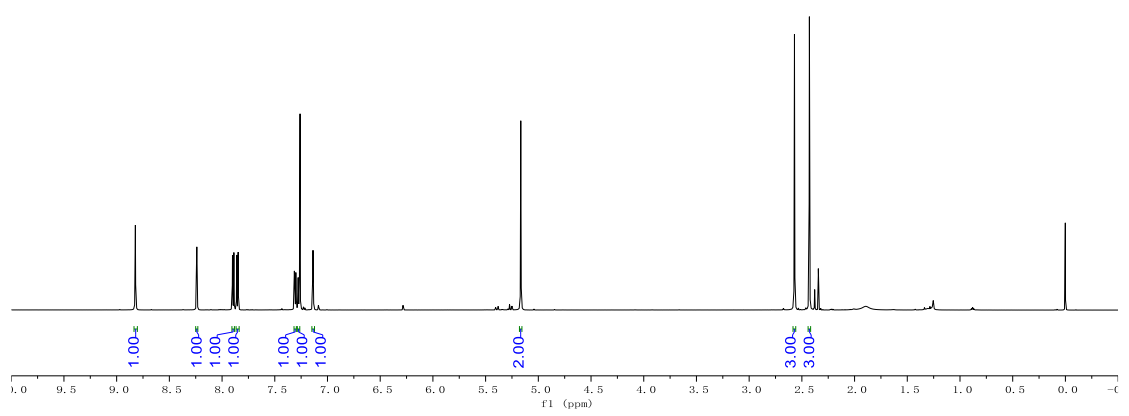

159.00  
 150.67  
 141.61  
 137.71  
 134.53  
 133.07  
 128.95  
 128.53  
 127.17  
 126.96  
 126.20  
 126.02  
 125.32  
 122.72  
 108.98

69.48

22.58  
 21.24

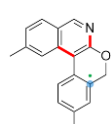

3aI

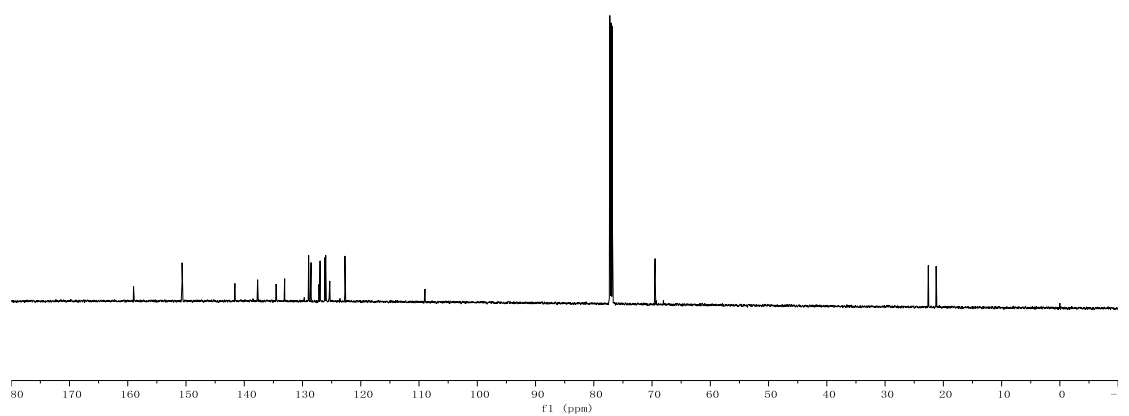



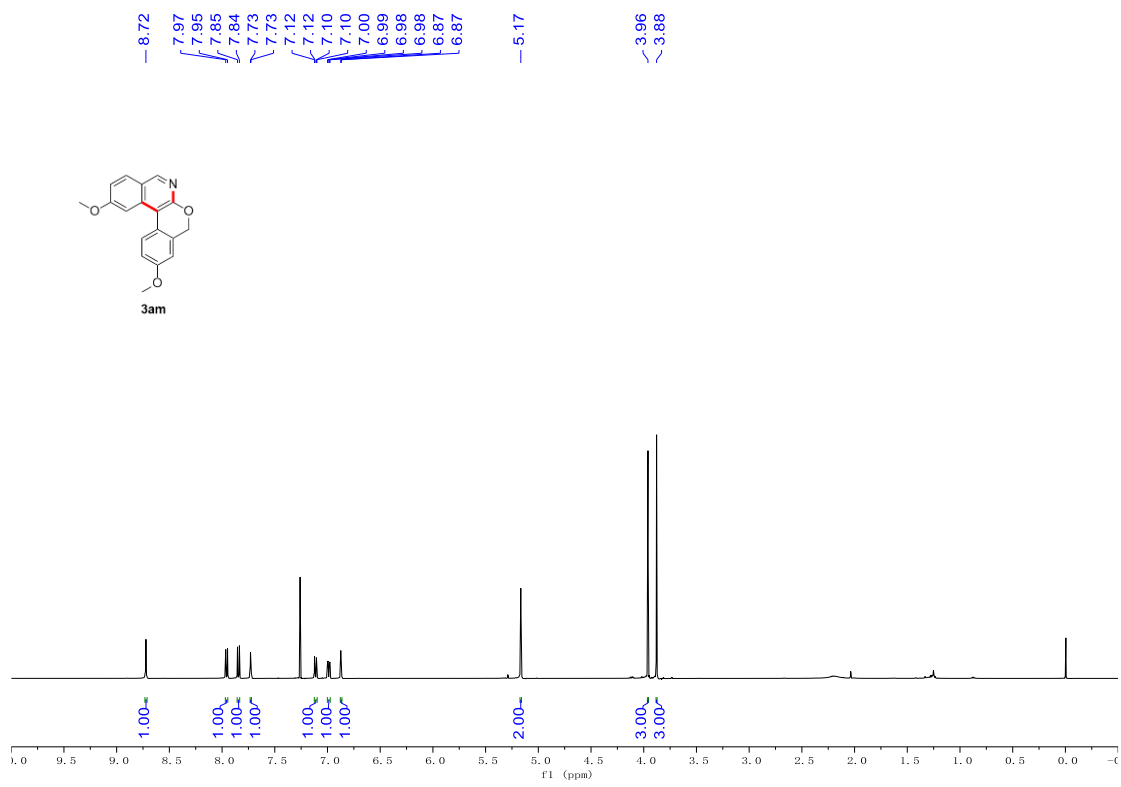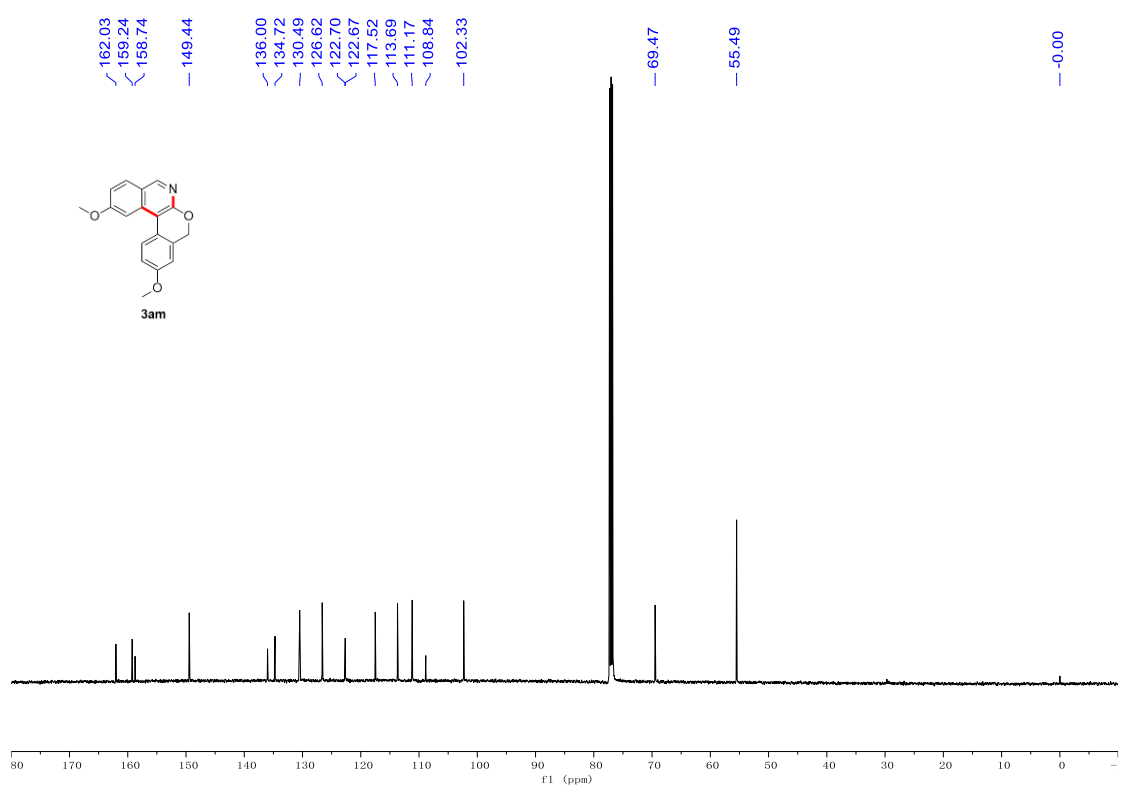

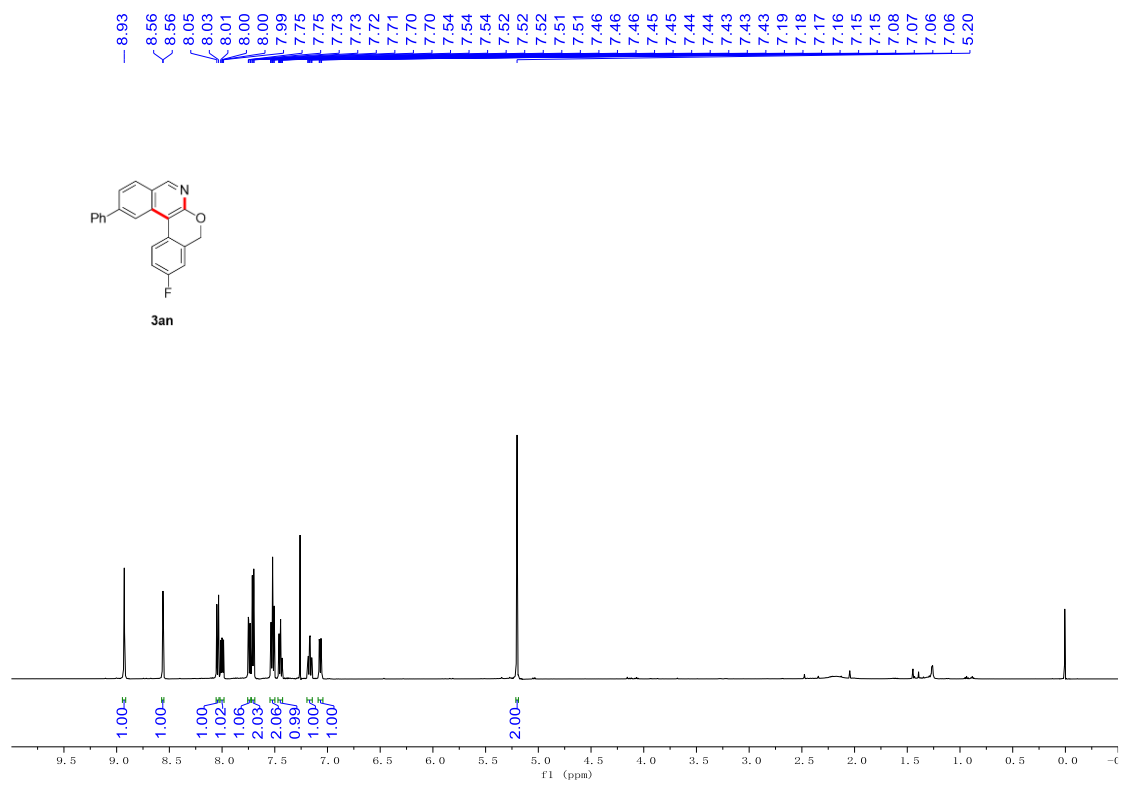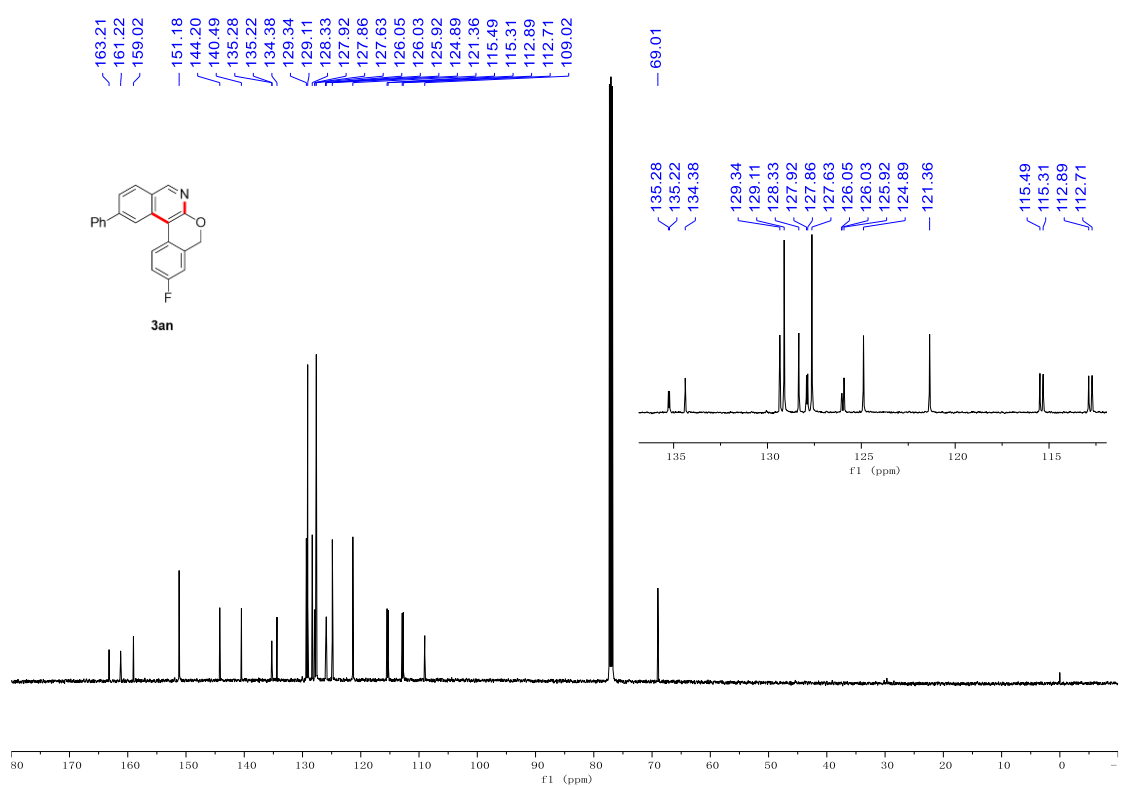

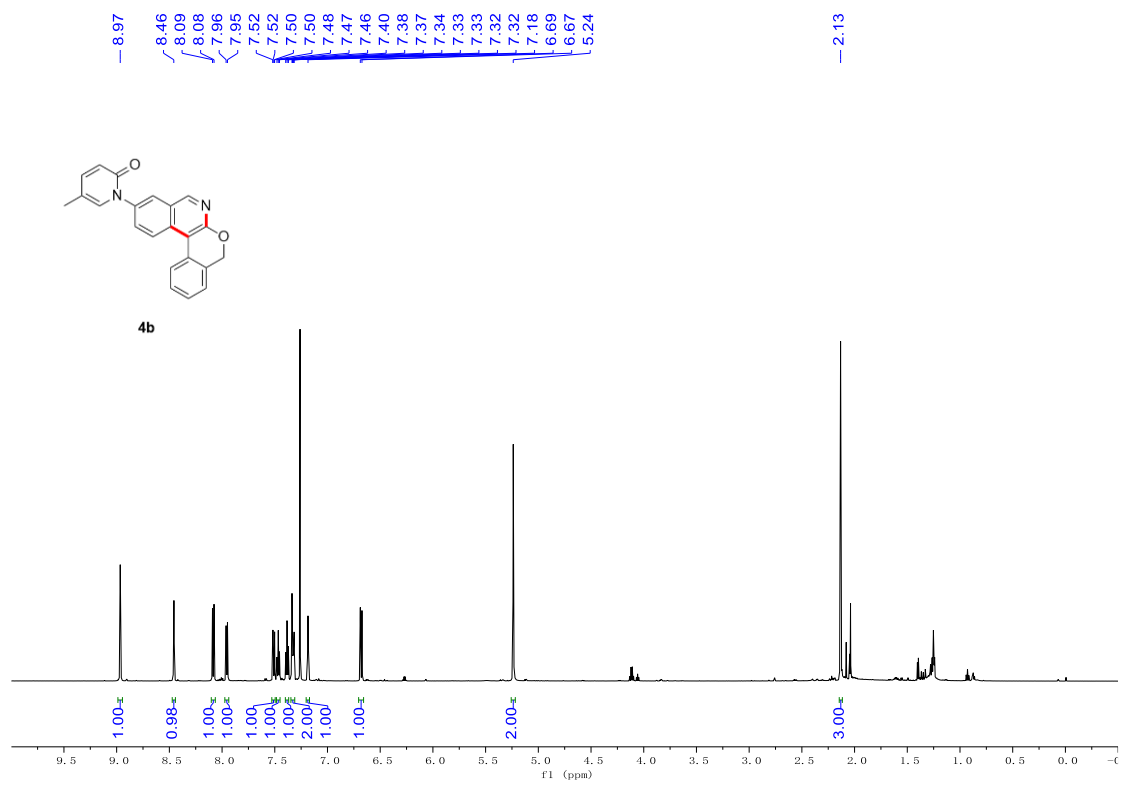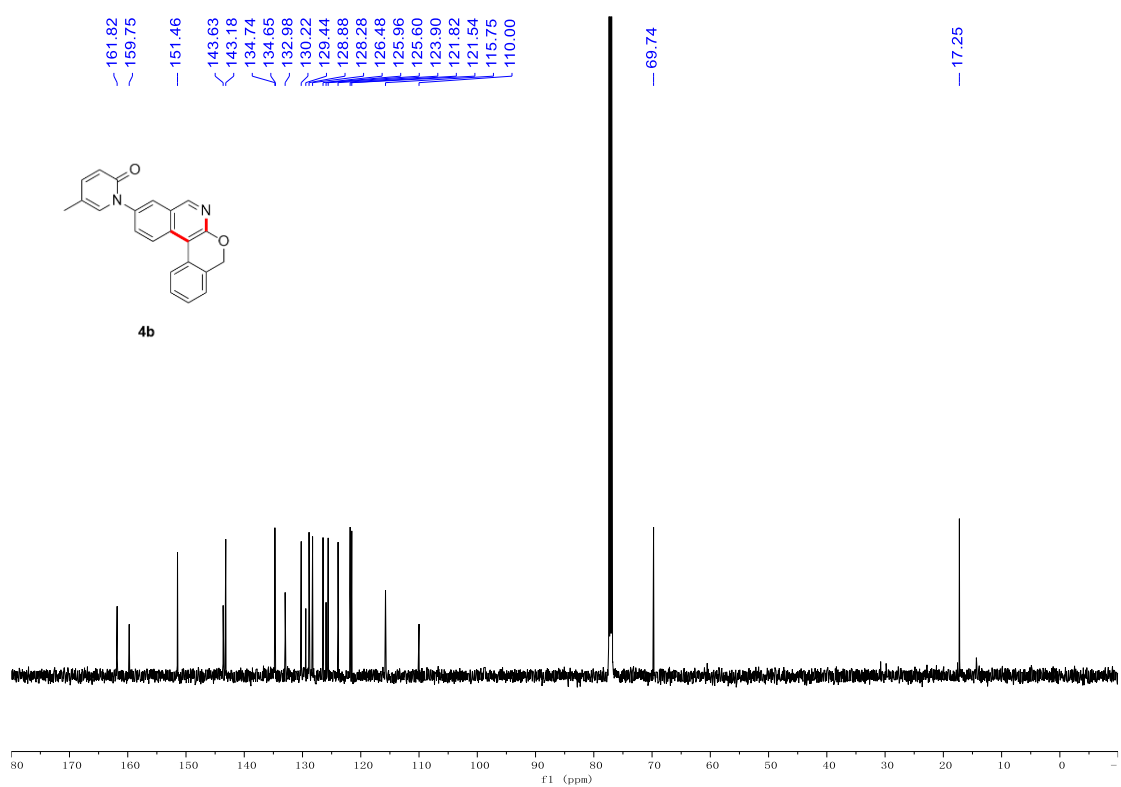

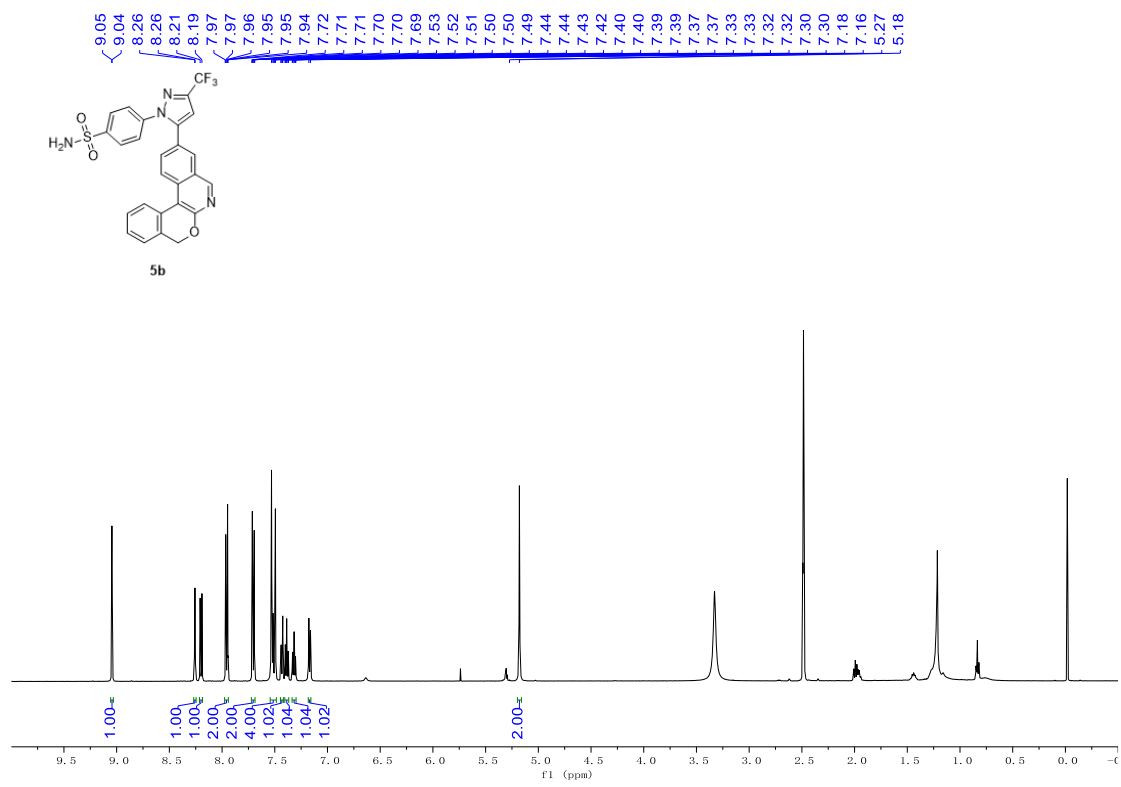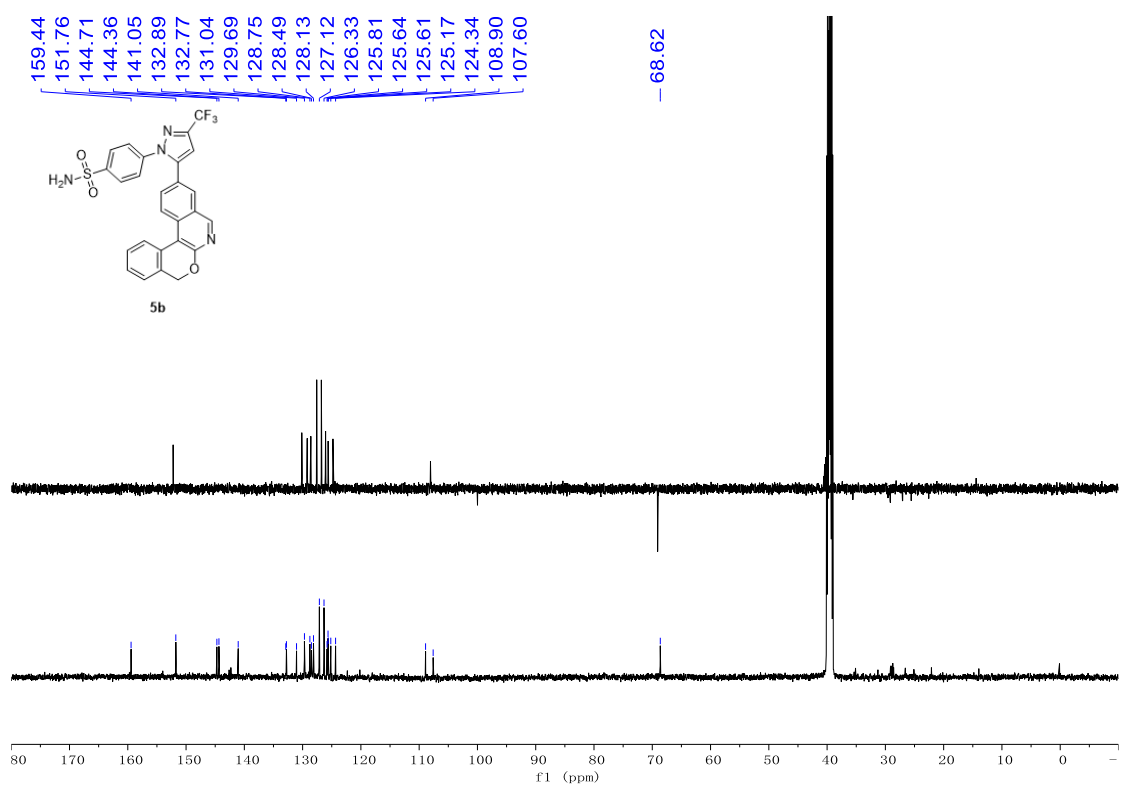

## VI. Reference

1. (a)A. Ren, P. Lu and Y. Wang, Convenient preparation of 4-diazoisochroman-3-imines and 3-substituted 3,5-dihydroisochromeno[3,4-d][1,2,3]triazoles, *Chem. Commun.*, 2017, **53**, 3769-3772; (b)M. Zhang, F. Wu, H. Wang, J. Wu and W. Chen, Copper-Catalyzed Sequential Azomethine Imine-Alkyne Cycloaddition and Umpolung Thiolation Reactions, *Adv. Synth. Catal.*, 2017, **359**, 2768-2772.
